# Supplementary material for: HIV seroprevalence in five key populations in Europe: a systematic literature review, 2009 to 2019
Source: PubMed Central journal article supplement (PMC8619876; doi:10.2807/1560-7917.es.2021.26.47.2100044), 2021-11-25
Supplement: 21-00044_STENGAARD_supplement.pdf [file 21-00044_STENGAARD_supplement.pdf]

## Supplementary material. HIV seroprevalence in five key populations in Europe: a systematic literature review, 2009 to 2019

This supplementary material is hosted by *Eurosurveillance* as supporting information alongside the article 'HIV seroprevalence in five key populations in Europe: a systematic literature review, 2009 to 2019' on behalf of the authors who remain responsible for the accuracy and appropriateness of the content. The same standards for ethics, copyright, attributions and permissions as for the article apply. Supplements are not edited by Eurosurveillance and the journal is not responsible for the maintenance of any links or email addresses provided therein.

**Supplementary Table S1a. Search string and results – PubMed**

| Search | Terms                                                                                                                                                                                                                                                                                                                                                                                                                                                                                                                                                                                                                                                                                                                                                                                                                                                                                                                                                                                                                                                                       | Results |
|--------|-----------------------------------------------------------------------------------------------------------------------------------------------------------------------------------------------------------------------------------------------------------------------------------------------------------------------------------------------------------------------------------------------------------------------------------------------------------------------------------------------------------------------------------------------------------------------------------------------------------------------------------------------------------------------------------------------------------------------------------------------------------------------------------------------------------------------------------------------------------------------------------------------------------------------------------------------------------------------------------------------------------------------------------------------------------------------------|---------|
| #1     | Search ("Prevalence"[Mesh] OR "Population Surveillance"[Mesh] OR "Seroepidemiologic Studies"[Mesh] OR "Epidemiological Monitoring"[Mesh] OR prevalen*[TW] OR seroprevalen*[TW] OR sero prevalen*[TW] OR seroepidemiolog*[TW] OR sero epidemiolog*[TW] OR serosurvey*[TW] OR sero survey*[TW] OR seropositiv*[TW] OR sero positiv*[TW] OR serolog*[TI] OR epidemiolog*[TI] OR surveillance*[TI] OR epidemiolog*[OT] OR surveillance*[OT])                                                                                                                                                                                                                                                                                                                                                                                                                                                                                                                                                                                                                                    | 1043340 |
| #2     | Search ("HIV Infections"[Mesh:NoExp] OR "HIV"[Mesh] OR HIV[TW] OR "Human immune deficiency virus"[TW] OR "Human immune deficiency viruses"[TW] OR Human immunodeficiency virus*[TW] OR Human immuno deficiency virus*[TW])                                                                                                                                                                                                                                                                                                                                                                                                                                                                                                                                                                                                                                                                                                                                                                                                                                                  | 351509  |
| #3     | Search (#1 AND #2)                                                                                                                                                                                                                                                                                                                                                                                                                                                                                                                                                                                                                                                                                                                                                                                                                                                                                                                                                                                                                                                          | 74441   |
| #4     | Search ("HIV Seroprevalence"[Mesh] OR "HIV Seropositivity"[Mesh] OR HIV serodiagnos*[TW] OR HIV serolog*[TW] OR HIV diagnos*[TW] OR HIV screen*[TW] OR ((serolog*[TI] OR serodiagnos*[TI] OR diagnos*[TI] OR screen*[TI] AND (HIV[TI] OR "Human immune deficiency virus"[TI] OR "Human immune deficiency viruses"[TI] OR Human immunodeficiency virus*[TI] OR Human immuno deficiency virus*[TI])) OR ((serolog*[OT] OR serodiagnos*[OT] OR diagnos*[OT] OR screen*[OT] AND (HIV[OT] OR "Human immune deficiency virus"[OT] OR "Human immune deficiency viruses"[OT] OR Human immunodeficiency virus*[OT] OR Human immuno deficiency virus*[OT])))                                                                                                                                                                                                                                                                                                                                                                                                                          | 37222   |
| #5     | Search (#3 OR #4)                                                                                                                                                                                                                                                                                                                                                                                                                                                                                                                                                                                                                                                                                                                                                                                                                                                                                                                                                                                                                                                           | 82315   |
| #6     | Search ("Emigrants and Immigrants"[Mesh] OR "Transients and Migrants"[Mesh] OR "person resettlement"[TW] OR "person resettlements"[TW] OR "persons resettlement"[TW] OR "persons resettlements"[TW] OR "people resettlement"[TW] OR "people resettlements"[TW] OR "request for asylum"[TW] OR "request for political asylum"[TW] OR "requested asylum"[TW] OR "requested for political asylum"[TW] OR "requested political asylum"[TW] OR "resettlement of people"[TW] OR "resettlement of person"[TW] OR "resettlement of persons"[TW] OR alien*[TW] OR asylum*[TW] OR displaced*[TW] OR emigrant*[TW] OR emigrat*[TW] OR foreig*[TW] OR immigrant*[TW] OR immigrat*[TW] OR migrant*[TW] OR migrat*[TW] OR minorities[TW] OR minority[TW] OR refugee*[TW] OR born abroad [TW] OR born outside[TW] OR ethnic group [TW] OR ethnicity [TW] OR ((countr*[tiab] OR africa*[tiab] OR asia*[tiab] OR racial*[tiab] OR eastern europe*[tiab] OR endemic area*[tiab] OR foreign*[tiab]) AND (origin*[tiab] OR born*[tiab] OR nationalit*[tiab])) OR origin[TW] OR nationality[TW]) | 990544  |

|     |                                                                                                                                                                                                                                                                                                                                                                                                                                                                                                                                                                                                                                                                                                                         |         |
|-----|-------------------------------------------------------------------------------------------------------------------------------------------------------------------------------------------------------------------------------------------------------------------------------------------------------------------------------------------------------------------------------------------------------------------------------------------------------------------------------------------------------------------------------------------------------------------------------------------------------------------------------------------------------------------------------------------------------------------------|---------|
| #7  | Search ("Prisoners"[Mesh] OR "Prisons"[Mesh] OR cellmate*[TW] OR closed setting*[TW] OR confinement*[TW] OR convict*[TW] OR correctional*[TW] OR custodial*[TW] OR custody[TW] OR custodies[TW] OR detainee*[TW] OR detention*[TW] OR gaol*[TW] OR imprison*[TW] OR incarcerat*[TW] OR inmate*[TW] OR jail*[TW] OR offender[TW] OR offenders[TW] OR penal[TW] OR penitentiary*[TW] OR prison*[TW] OR reformatory*[TW] OR remand*[TW])                                                                                                                                                                                                                                                                                   | 73347   |
| #8  | Search ("Bisexuality"[Mesh] OR "Homosexuality, Male"[Mesh] OR "Sexual and Gender Minorities"[Mesh] OR "male to male sexual contact"[TW] OR "male to male sex"[TW] OR "men having sex with men"[TW] OR "men having sexual relations with men"[TW] OR "men reporting sex with men"[TW] OR "men who had sex with men"[TW] OR "men who have sex with both men and women"[TW] OR "men who have sex with both women and men"[TW] OR "men who have sex with men"[TW] OR "non binary"[TW] OR non heterosexual*[TW] OR bisexual*[TW] OR cruisin'[TW] OR cruising*[TW] OR gay*[TW] OR homosexual*[TW] OR lgbt[TW] OR lesbigay*[TW] OR MASM[TW] OR MSM[TW] OR MSMW[TW] OR GBMSM[TW] OR GB-MSM[TW] OR queer*[TW])                   | 47161   |
| #9  | Search ("Transgender Persons"[Mesh] OR "Transsexualism"[Mesh] OR gender reassignment*[TW] OR gender variant*[TW] OR gblt[TW] OR gbltq[TW] OR gbltqq[TW] OR intersex individual*[TW] OR intersex people[TW] OR intersex person*[TW] OR lgbt[TW] OR lgbtq[TW] OR lgbtqq[TW] OR sexual dissident*[TW] OR trans female*[TW] OR trans gender*[TW] OR trans man[TW] OR trans men[TW] OR trans people[TW] OR trans person*[TW] OR trans sexual*[TW] OR trans woman[TW] OR trans women[TW] OR transgender*[TW] OR transman[TW] OR transmen[TW] OR transpeople[TW] OR transperson*[TW] OR transsexual*[TW] OR transwoman[TW] OR transwomen[TW] OR two spirit individual*[TW] OR two spirit people[TW] OR two spirit person*[TW]) | 9510    |
| #10 | Search ("Sex Work"[Mesh] OR "Sex Workers"[Mesh] OR sex work*[TW] OR sex industr*[TW] OR prostitut*[TW] OR exchange sex[TW] OR transactional sex[TW] OR survival sex[TW] OR paid sex[TW] OR "sex for payment"[TW] OR female sex work*[TW] OR fsw[TW] OR male sex work*[TW] OR msw[TW] OR whore*[TW] OR call girl*[TW] OR streetwalker*[TW] OR nightwalker*[TW] OR "lady of the night"[TW] OR "ladies of the night"[TW] OR "walk the pavement"[TW] OR csw)                                                                                                                                                                                                                                                                | 14712   |
| #11 | Search ("Gravidity"[Mesh] OR "Pregnancy"[Mesh] OR "Pregnant Women"[Mesh] OR "Prenatal Care"[Mesh] OR "Prenatal Diagnosis"[Mesh] OR antenatal*[TW] OR ante natal*[TW] OR expectant[TW] OR expecting[TW] OR gravid*[TW] OR pregnanc*[TW] OR pregnant*[TW])                                                                                                                                                                                                                                                                                                                                                                                                                                                                | 990897  |
| #12 | Search ("Substance Abuse, Intravenous"[Mesh] OR "people who inject drugs"[TW] OR "person who inject drugs"[TW] OR "persons who inject drugs"[TW] OR intravenous substance abus*[TW] OR parenteral drug abus*[TW] OR intravenous drug abus*[TW] OR intravenous substance use*[TW] OR intravenous substance misus*[TW] OR parenteral drug use*[TW] OR intravenous drug use*[TW] OR injecting drug use*[TW] OR pwid[TW] OR idu[TW] OR ivdu[TW] OR ((inject*[TI] OR intraven*[TI] OR parenteral[TI] OR use[TI] OR misus*[TI] OR use*[TI]) AND (drug*[TI] OR substance*[TI])) OR ((inject*[OT] OR intraven*[OT] OR parenteral[OT]) AND (drug*[OT] OR substance*[OT])))                                                       | 33560   |
| #13 | Search (#6 OR #7 OR #8 OR #9 OR #10 OR #11 OR #12)                                                                                                                                                                                                                                                                                                                                                                                                                                                                                                                                                                                                                                                                      | 2087848 |
| #14 | Search (Europe*[ad] OR Europa*[ad] OR EU[ad] OR EEA[ad] OR EFTA[ad] OR "EU/EEA"[ad] OR "EU/EFTA"[ad] OR ECSC[ad] OR Euratom[ad] OR Eurozone[ad] OR EEC[ad] OR ec[ad] OR (Schengen[ad] AND (area[ad] OR countr*[ad] OR region*[ad]                                                                                                                                                                                                                                                                                                                                                                                                                                                                                       | 78623   |

|     |                                                                                                                                                                                                                                                                                                                                                                                                                                                                                                                                                                                                                                                                                                                                                                                                                                                                                                                                                                                                                                                                                                                                                                                                                                                                                                                                                                                                                                                                                                                                                                                                                                                                                                                                                                                                                                                                                                                                                                                                                                                                                                                                                                                                                                                                                                                                                                                                                                                                                                                                                                                                                                                                                                                                                                                                                                                                                                                                                                                                                                                                                                                                                   |         |
|-----|---------------------------------------------------------------------------------------------------------------------------------------------------------------------------------------------------------------------------------------------------------------------------------------------------------------------------------------------------------------------------------------------------------------------------------------------------------------------------------------------------------------------------------------------------------------------------------------------------------------------------------------------------------------------------------------------------------------------------------------------------------------------------------------------------------------------------------------------------------------------------------------------------------------------------------------------------------------------------------------------------------------------------------------------------------------------------------------------------------------------------------------------------------------------------------------------------------------------------------------------------------------------------------------------------------------------------------------------------------------------------------------------------------------------------------------------------------------------------------------------------------------------------------------------------------------------------------------------------------------------------------------------------------------------------------------------------------------------------------------------------------------------------------------------------------------------------------------------------------------------------------------------------------------------------------------------------------------------------------------------------------------------------------------------------------------------------------------------------------------------------------------------------------------------------------------------------------------------------------------------------------------------------------------------------------------------------------------------------------------------------------------------------------------------------------------------------------------------------------------------------------------------------------------------------------------------------------------------------------------------------------------------------------------------------------------------------------------------------------------------------------------------------------------------------------------------------------------------------------------------------------------------------------------------------------------------------------------------------------------------------------------------------------------------------------------------------------------------------------------------------------------------------|---------|
|     | <p>OR state[ad] OR states[ad])) OR Euroregion[ad] OR Euroregions[ad] OR Balkan[ad] OR Balkans[ad] OR Baltic[ad] OR (Mediterranean[ad] AND (area[ad] OR countr*[ad] OR region*[ad] OR state[ad] OR states[ad])) OR (Alpine[ad] AND (area[ad] OR countr*[ad] OR region*[ad] OR state[ad] OR states[ad])) OR Scandinavia[ad] OR Scandinavian[ad] OR "Nordic country"[ad] OR "Nordic countries"[ad] OR "Nordic state"[ad] OR "Nordic states"[ad] OR Danubian[ad] OR "Iberian peninsula"[ad] OR "Peninsula iberica"[ad] OR "Peninsule Iberique"[ad] OR "Iberiar Penintsula"[ad] OR Iberia[ad] OR Anatolia[ad] OR Anadolu[ad] OR Anatole[ad] OR Anatolian[ad] OR Yugoslavia[ad] OR Czechoslovakia[ad] OR "Czecho Slovakia"[ad] OR Ceskoslovensko[ad] OR "Cesko slovensko"[ad] OR Benelux[ad] OR Fennoscandia[ad] OR "Fenno Scandinavia"[ad] OR Fennoskandi*[ad] OR (Visegrad[ad] AND (Group[ad] OR Four[ad] OR Triangle[ad])) OR "Visegradska ctyrka"[ad] OR "Visegradska skupina"[ad] OR "Visegradi Egyuttmukodes"[ad] OR "Visegradi negyek"[ad] OR "Grupa Wyszehradzka"[ad] OR "Vysehradaska skupina"[ad] OR "Vysehradaska stvorka"[ad])</p>                                                                                                                                                                                                                                                                                                                                                                                                                                                                                                                                                                                                                                                                                                                                                                                                                                                                                                                                                                                                                                                                                                                                                                                                                                                                                                                                                                                                                                                                                                                                                                                                                                                                                                                                                                                                                                                                                                                                                                                                          |         |
| #15 | <p>Search (GB[ad] OR "United kingdom"[ad] OR UK[ad] OR Britain[ad] OR British[ad] OR England[ad] OR English[ad] OR Scotland[ad] OR Scottish[ad] OR Scots[ad] OR Wales[ad] OR Cymru[ad] OR Welsh[ad] OR "North Ireland"[ad] OR "Northern Ireland"[ad] OR Irish[ad] OR Avon[ad] OR Bedfordshire[ad] OR Berkshire[ad] OR Bristol[ad] OR Buckinghamshire[ad] OR Cambridgeshire[ad] OR "Isle of Ely"[ad] OR Cheshire[ad] OR Cleveland[ad] OR Cornwall[ad] OR Cumberland[ad] OR Cumbria[ad] OR Derbyshire[ad] OR Devon[ad] OR Dorset[ad] OR Durham[ad] OR Essex[ad] OR Gloucestershire[ad] OR Hampshire[ad] OR Southampton[ad] OR (Hereford[ad] AND Worcester[ad]) OR Hertfordshire[ad] OR Herefordshire[ad] OR Humberside[ad] OR Huntingdon[ad] OR Huntingdonshire[ad] OR "Isle of Wight"[ad] OR Kent[ad] OR Lancashire[ad] OR Leicestershire[ad] OR Lincolnshire[ad] OR London[ad] OR Manchester[ad] OR Merseyside[ad] OR Middlesex[ad] OR Norfolk[ad] OR Northamptonshire[ad] OR Northumberland[ad] OR Nottinghamshire[ad] OR Oxfordshire[ad] OR Peterborough[ad] OR Rutland[ad] OR Shropshire[ad] OR Salop[ad] OR Somerset[ad] OR Yorkshire[ad] OR Staffordshire[ad] OR Suffolk[ad] OR Surrey[ad] OR Sussex[ad] OR (Tyne[ad] AND Wear[ad]) OR Warwickshire[ad] OR midlands[ad] OR Westmorland[ad] OR Wiltshire[ad] OR Worcestershire[ad] OR "Isle of Man"[ad] OR Jersey[ad] OR Guernsey[ad] OR "Channel Islands"[ad] OR Aberdeen[ad] OR Aberdeenshire[ad] OR Angus[ad] OR Forfarshire[ad] OR Argyll[ad] OR Ayrshire[ad] OR Banffshire[ad] OR Berwickshire[ad] OR bute[ad] OR Caithness[ad] OR Clackmannanshire[ad] OR Cromartyshire[ad] OR Dumfriesshire[ad] OR Dunbartonshire[ad] OR Dumbarton[ad] OR Dundee[ad] OR Lothian[ad] OR Haddingtonshire[ad] OR Edinburgh[ad] OR Fife[ad] OR Glasgow[ad] OR Inverness-shire[ad] OR Kincardineshire[ad] OR Kinross-shire[ad] OR Kirkcudbrightshire[ad] OR Lanarkshire[ad] OR Midlothian[ad] OR Moray[ad] OR Elginshire[ad] OR Nairnshire[ad] OR Orkney[ad] OR Peeblesshire[ad] OR Perthshire[ad] OR Renfrewshire[ad] OR (Ross[ad] AND Cromarty[ad]) OR Ross-shire[ad] OR Roxburghshire[ad] OR Selkirkshire[ad] OR Shetland[ad] OR Zetland[ad] OR Stirlingshire[ad] OR Sutherland[ad] OR Linlithgowshire[ad] OR Wigtownshire[ad] OR Anglesey[ad] OR Brecknockshire[ad] OR Caernarfonshire[ad] OR Carmarthenshire[ad] OR Cardiganshire[ad] OR Ceredigion[ad] OR Clwyd[ad] OR Denbighshire[ad] OR Dyfed[ad] OR Flintshire[ad] OR Glamorgan[ad] OR Gwent[ad] OR Gwynedd[ad] OR Merionethshire[ad] OR Montgomeryshire[ad] OR Monmouthshire[ad] OR Pembrokeshire[ad] OR Powys[ad] OR Radnorshire[ad] OR Antrim[ad] OR Aontroim[ad] OR "Contae Aontroma"[ad] OR Anthrim[ad] OR Antrim[ad] OR Entrim[ad] OR Armagh[ad] OR "Ard Mhacha"[ad] OR Airmagh[ad] OR Belfast[ad] OR (Down[ad] AND (district[ad] OR council[ad] OR County[ad])) OR "An Dun"[ad] OR "an Duin"[ad] OR Doon[ad] OR Doun[ad] OR Fermanagh[ad] OR "Fear Manach"[ad] OR "Fhear Manach"[ad] OR Fermanay[ad] OR Londonderry[ad] OR Doire[ad] OR Dhoire[ad] OR Lunnonderrie[ad] OR Derry[ad] OR Birmingham[ad] OR Leeds[ad] OR Sheffield[ad] OR</p> | 6858089 |

Bradford[ad] OR Liverpool[ad]) OR (Sweden[ad] OR Sverige[ad] OR Swedish[ad] OR Svenska[ad] OR svenskar[ad] OR Swede[ad] OR Swedes[ad] OR Norrland[ad] OR Mellansverige[ad] OR Smaland[ad] OR Stockholm\*[ad] OR Sydsverige[ad] OR Vastsverige[ad] OR Blekinge[ad] OR Dalarna[ad] OR Gavleborg\*[ad] OR Gotland\*[ad] OR Halland\*[ad] OR Jamtland\*[ad] OR Jonkoping\*[ad] OR Kalmar[ad] OR Kronoberg\*[ad] OR Norrbotten\*[ad] OR Orebro[ad] OR Ostergotland\*[ad] OR Skane[ad] OR Sodermanlands[ad] OR Uppsala[ad] OR Varmland\*[ad] OR Vasterbotten\*[ad] OR Vasternorrland\*[ad] OR Vastmanland\*[ad] OR vastergotland\*[ad] OR Gotaland\*[ad] OR Gothenburg[ad] OR Goteborg[ad] OR Malmo[ad] OR Vasteras[ad] OR Linkoping[ad] OR Helsingborg[ad] OR Halsingborg[ad] OR Norrkoping[ad]) OR (Spain[ad] OR Espana[ad] OR Spanish[ad] OR Espanol\*[ad] OR Spaniard\*[ad] OR Andalucia[ad] OR Andalusia[ad] OR Aragon[ad] OR Arago[ad] OR Cantabria[ad] OR Canarias[ad] OR "Canary Islands"[ad] OR (Canaries[ad] AND island\*[ad]) OR "Castile and leon"[ad] OR "Castilla y Leon"[ad] OR "Castile La Mancha"[ad] OR "Castilla La Mancha"[ad] OR Cataluna[ad] OR Catalonia[ad] OR Ceuta[ad] OR Madrid[ad] OR Melilla[ad] OR Navarra[ad] OR Navarre[ad] OR Valencia\*[ad] OR Extremadura[ad] OR Galicia[ad] OR Balears[ad] OR "Balearic Islands"[ad] OR "Balear Islands"[ad] OR Baleares[ad] OR "La Rioja"[ad] OR "Pais Vasco"[ad] OR "Basque Country"[ad] OR "Baske region"[ad] OR Euskadi[ad] OR Asturias[ad] OR Murcia[ad] OR Coruna[ad] OR Alava[ad] OR Araba[ad] OR Albacete[ad] OR Alicante[ad] OR Alacant[ad] OR Almeria[ad] OR Avila[ad] OR Badajoz[ad] OR Badajos[ad] OR Barcelona[ad] OR Burgos[ad] OR Caceres[ad] OR Cadiz[ad] OR Castellon[ad] OR Castello[ad] OR "Ciudad Real"[ad] OR Cordoba[ad] OR Cuenca[ad] OR Eivissa[ad] OR Ibiza[ad] OR Formentera[ad] OR "El Hierro"[ad] OR Fuerteventura[ad] OR Galiza[ad] OR Girona[ad] OR Gerona[ad] OR "Gran Canaria"[ad] OR Granada[ad] OR Guadalajara[ad] OR Guipuzcoa[ad] OR Gipuzkoa[ad] OR Huelva[ad] OR Huesca[ad] OR Jaen[ad] OR "La Gomera"[ad] OR "La Palma"[ad] OR Lanzarote[ad] OR Leon[ad] OR Lleida[ad] OR Lerida[ad] OR Lugo[ad] OR Malaga[ad] OR Mallorca[ad] OR Majorca[ad] OR Menorca[ad] OR Minorca[ad] OR Murcia[ad] OR Ourense[ad] OR Orense[ad] OR Palencia[ad] OR Pontevedra[ad] OR Salamanca[ad] OR Segovia[ad] OR Sevilla[ad] OR Seville[ad] OR Soria[ad] OR Tarragona[ad] OR Tenerife[ad] OR Teruel[ad] OR Toledo[ad] OR Valladolid[ad] OR Vizcaya[ad] OR Biscay[ad] OR Zamora[ad] OR Zaragoza[ad] OR Saragossa[ad] OR "Las Palmas"[ad] OR Bilbao[ad] OR Bilbo[ad]) OR (Slovenia\*[ad] OR Slovenija[ad] OR slovensk\*[ad] OR Slovenci[ad] OR Slovene\*[ad] OR Gorenjska[ad] OR Carniola[ad] OR Goriska[ad] OR Gorizia[ad] OR Jugovzhodna[ad] OR Koroska[ad] OR Carinthia[ad] OR "Notranjsko kraska"[ad] OR "Obalno kraska"[ad] OR "Coastal karst"[ad] OR Osrednjeslovenska[ad] OR Podravska[ad] OR Drava[ad] OR Pomurska[ad] OR Mura[ad] OR Savinjska[ad] OR Savinja[ad] OR Spodnjeposavska[ad] OR Zasavska[ad] OR "Central Sava"[ad] OR Posavska[ad] OR "Lower Sava"[ad] OR Ljubljana[ad] OR Laibach[ad] OR Lubiana[ad] OR Maribor[ad] OR "Marburg an der Drau"[ad] OR Kranj[ad] OR Carnium[ad] OR Creina[ad] OR Chreina[ad] OR Krainbur[ad] OR Koper[ad] OR Capodistria[ad] OR Kopar[ad] OR Celje[ad] OR "Novo mesto"[ad] OR Neustadt[ad] OR Domzale[ad] OR Velenje[ad] OR Wollan[ad] OR Woellan[ad] OR "Nova Gorica"[ad] OR Kamnik[ad]) OR (Slovakia[ad] OR Slovensk\*[ad] OR Slovak\*[ad] OR Slovaci[ad] OR Slovenki[ad] OR Bratislav\*[ad] OR Presporok[ad] OR Pressburg[ad] OR Pressburg[ad] OR Posenium[ad] OR Banskobystri\*[ad] OR "Banska Bystrica"[ad] OR Neusohl[ad] OR Besztercebanya[ad] OR Kosic\*[ad] OR Kaschau[ad] OR Kassa[ad] OR Nitrian\*[ad] OR Nitra[ad] OR Neutra[ad] OR Nyitra[ad] OR Nyitria[ad] OR Trnav\*[ad] OR Tyrnau[ad] OR Nagyszombat[ad] OR Tyrnavia[ad] OR Presov\*[ad] OR Trencian\*[ad] OR Trencin[ad] OR Trentschin[ad] OR Trencsen[ad] OR Zilina[ad] OR Sillein[ad] OR Zsolna[ad] OR Zylina[ad] OR (Martin[ad] AND (city[ad] OR Svaty[ad])) OR Turocszentmarton[ad] OR Poprad[ad] OR Deutschendorf[ad] OR Zvolen[ad]) OR (Romania\*[ad] OR Rumania\*[ad] OR Roumania\*[ad] OR Romani[ad] OR Ruman[ad] OR Alba[ad] OR Arad[ad] OR Arges[ad] OR Bacau[ad] OR Bihor[ad] OR "Bistrita Nasaud"[ad] OR Botosani[ad] OR Braila[ad] OR Brasov[ad] OR Kronstadt[ad] OR Brasso[ad] OR Brassovia[ad] OR Coron[ad] OR Bucharest[ad]

OR Bucuresti[ad] OR Buzau[ad] OR Calarasi[ad] OR "Caras-Severin"[ad] OR Cluj[ad] OR Klausenburg[ad] OR Kolozsvar[ad] OR Constanta[ad] OR Tomis[ad] OR Konstantia[ad] OR Kostence[ad] OR Covasna[ad] OR Dambovita[ad] OR Dolj[ad] OR Galati[ad] OR Galatz[ad] OR Galac[ad] OR Kalas[ad] OR Giurgiu[ad] OR Gorj[ad] OR Harghita[ad] OR Hunedoara[ad] OR Ialomita[ad] OR Iasi[ad] OR Jassy[ad] OR Lassy[ad] OR Ilfov[ad] OR Maramures[ad] OR Mehedinti[ad] OR Mures[ad] OR Neamt[ad] OR (Olt[ad] AND (river[ad] OR county[ad] OR region[ad] OR judetul[ad] OR Raul[ad])) OR Prahova[ad] OR Salaj[ad] OR "Satu Mare"[ad] OR Sibiu[ad] OR Suceava[ad] OR Teleorman[ad] OR Timis[ad] OR Tulcea[ad] OR Valcea[ad] OR Vilcea[ad] OR Vaslui[ad] OR Vrancea[ad] OR Timisoara[ad] OR Temeswar[ad] OR Temeschburg[ad] OR Temeschwar[ad] OR Temesvar[ad] OR Temisvar[ad] OR Timisvar[ad] OR Temesva[ad] OR Craiova[ad] OR Ploiesti[ad] OR Ploesti[ad] OR Oradea[ad] OR Varad[ad] OR Varat[ad]) OR (Portugal[ad] OR Portugues\*[ad] OR Azores[ad] OR Acores[ad] OR Madeira[ad] OR Alentejo[ad] OR Algarve[ad] OR Lisboa[ad] OR Lisbon[ad] OR "Alto Tras-os-Montes"[ad] OR (Ave[ad] AND (community[ad] OR intermunicipal[ad] OR comunidade[ad]))) OR Mondego[ad] OR Vouga[ad] OR Beira[ad] OR Cavado[ad] OR Lafoes[ad] OR Douro[ad] OR Porto[ad] OR Oporto[ad] OR Tejo[ad] OR Minho[ad] OR Setubal[ad] OR Pinhal[ad] OR "Serra da Estrela"[ad] OR Tamega[ad] OR Leira[ad] OR Santarem[ad] OR Beja[ad] OR Faro[ad] OR Evora[ad] OR Portalegre[ad] OR "Castelo Branco"[ad] OR Guarda[ad] OR Cimbra[ad] OR Aveiro[ad] OR Viseu[ad] OR Braganca[ad] OR Braganza[ad] OR Braga[ad] OR "Vila real"[ad] OR "Viana do Castelo"[ad] OR Gaia[ad] OR Amadora[ad] OR Funchal[ad] OR Coimbra[ad] OR Almada[ad] OR (Aguialva[ad] AND Cacem[ad])) OR (Poland[ad] OR Polska[ad] OR Polish[ad] OR Pole[ad] OR Poles[ad] OR Polski[ad] OR Polak[ad] OR Polka[ad] OR Polacy[ad] OR Dolnoslaskie[ad] OR Silesia\*[ad] OR Slask[ad] OR Pomorskie[ad] OR Pomerania\*[ad] OR Kujawsko[ad] OR Kuyavian[ad] OR Lodzkie[ad] OR Lodz[ad] OR Lubelskie[ad] OR Lublin[ad] OR Lubuskie[ad] OR Lubusz[ad] OR Lubus[ad] OR Malopolskie[ad] OR Mazowieckie[ad] OR Mazowske[ad] OR Masovia[ad] OR Masovian[ad] OR Opolskie[ad] OR Opole[ad] OR Podkarpackie[ad] OR Subcarpathian\*[ad] OR Podlaskie[ad] OR Podlachia[ad] OR Podlasie[ad] OR Slaskie[ad] OR Swietokrzyskie[ad] OR "Warmia Mazuria"[ad] OR "Warmian Mazurian"[ad] OR "Warmia Masuria"[ad] OR "Warmian Masurian"[ad] OR "Warmia Mazury"[ad] OR "Warminsko Mazurskie"[ad] OR "Warmian Masurian"[ad] OR Wielkopolskie[ad] OR Zachodniopomorskie[ad] OR Warsaw[ad] OR Warszawa[ad] OR Krakow[ad] OR Cracow[ad] OR Wroclaw[ad] OR Poznan[ad] OR Gdansk[ad] OR Szczecin[ad] OR Bydgoszcz[ad] OR Katowice[ad]) OR (Netherlands[ad] OR Nederland\*[ad] OR Dutch\*[ad] OR Drenthe[ad] OR Flevoland[ad] OR Friesland[ad] OR Fryslan[ad] OR Frisia[ad] OR Gelderland[ad] OR Guelders[ad] OR Groningen[ad] OR Limburg[ad] OR Brabant[ad] OR Holland[ad] OR Overijssel[ad] OR Overissel[ad] OR Utrecht[ad] OR Zeeland[ad] OR Amsterdam[ad] OR Rotterdam[ad] OR Hague[ad] OR "s-Gravenhage"[ad] OR "Den Haag"[ad] OR Eindhoven[ad] OR Tilburg[ad] OR Almere[ad] OR Breda[ad] OR Nijmegen[ad] OR Nimeguen[ad]) OR (Malta[ad] OR Maltese\*[ad] OR Maltin[ad] OR Gozo[ad] OR Ghawdex[ad] OR Valletta[ad] OR "Ill Belt"[ad] OR Birkirkara[ad] OR "B Kara"[ad] OR "B'Kara"[ad] OR Birchircara[ad] OR Mosta[ad] OR Qormi[ad] OR "St Paul s Bay"[ad] OR "St Paul's Bay"[ad] OR "Pawl il Bahar"[ad] OR Zabbar[ad] OR Sliema[ad] OR Naxxar[ad] OR Gwann[ad] OR "St John"[ad] OR Zebbug[ad] OR "Citta rohan"[ad] OR Fgura[ad]) OR (Luxembourg\*[ad] OR Luxemburg[ad] OR Letzebuerg[ad] OR Diekirch[ad] OR Grevenmacher[ad] OR "Esch sur Alzette"[ad] OR "Esch Uelzecht"[ad] OR "Esch an der Alzette"[ad] OR "Esch an der Alzig"[ad] OR Dudelange[ad] OR Diddeleng[ad] OR Dudelingen[ad] OR Duedelingen[ad] OR Schiffflange[ad] OR Scheffleng[ad] OR Schifflingen[ad] OR Bettembourg[ad] OR Beetebuerg[ad] OR Bettemburg[ad] OR Petange[ad] OR Peiteng[ad] OR Petingen[ad] OR Ettelbruck[ad] OR Ettelbreck[ad] OR Ettelbrueck[ad] OR Diekirch[ad] OR Dikrech[ad] OR Strassen[ad] OR Stroossen[ad] OR Bertrange[ad] OR Bartreng[ad] OR Bartringen[ad]) OR (Lithuania\*[ad] OR "Lietuvos Respublika"[ad] OR Lietuva[ad] OR lietuviu[ad] OR Alytus[ad] OR Alytaus[ad] OR Kaunas[ad] OR Kauno[ad] OR Klaipeda[ad] OR Klaipedos[ad] OR

Marijampoles[ad] OR Marijampole[ad] OR Panevezys[ad] OR Panevezio[ad] OR Siauliai[ad] OR Siauliu[ad] OR Taurages[ad] OR Taurage[ad] OR Telsiu[ad] OR Telsiai[ad] OR Utenos[ad] OR Utena[ad] OR Vilnius[ad] OR Vilniaus[ad] OR Mazeikiai[ad] OR Jonava[ad] OR Mazeikiu[ad] OR Jonavos[ad]) OR (Latvi\*[ad] OR Riga[ad] OR Courland[ad] OR Kurzeme[ad] OR Kurland[ad] OR Latgale[ad] OR Lettgallia[ad] OR Latgola[ad] OR Latgalia[ad] OR Vidzeme[ad] OR Vidumo[ad] OR Semigallia[ad] OR Semigalia[ad] OR Zemgale[ad] OR Pieriga[ad] OR Daugavpils[ad] OR Dinaburg[ad] OR Jekabpils[ad] OR Jakobstadt[ad] OR Jelgava[ad] OR Jurmala[ad] OR Liepaja[ad] OR Libau[ad] OR Rezekne[ad] OR Rezne[ad] OR Rositten[ad] OR Valmiera[ad] OR Wolmar[ad] OR Ventspils[ad] OR Windau[ad] OR Ogre[ad]) OR (Italy[ad] OR Italia\*[ad] OR Abruzzo[ad] OR Abruzzi[ad] OR Basilicata[ad] OR Lucania[ad] OR Calabria[ad] OR Campania[ad] OR "Emilia Romagna"[ad] OR "friuli venezia giulia"[ad] OR Lazio[ad] OR Latium[ad] OR Liguria\*[ad] OR Lombardy[ad] OR Lombardia[ad] OR Marche[ad] OR Marches[ad] OR Molisano[ad] OR Molise[ad] OR Piedmont\*[ad] OR Piemonte[ad] OR Bolzano[ad] OR Bozen[ad] OR Trentino[ad] OR Trento[ad] OR Puglia[ad] OR Apulia[ad] OR Sardinia[ad] OR Sardegna[ad] OR Sicily[ad] OR Sicilia[ad] OR Toscana[ad] OR Tuscany[ad] OR Umbria[ad] OR "Valle d Aosta"[ad] OR "Vallee d Aoste"[ad] OR "Valle d'Aosta"[ad] OR "Vallee d'Aoste"[ad] OR "Aosta Valley"[ad] OR Veneto[ad] OR Venetia[ad] OR Triveneto[ad] OR Rome[ad] OR Roma[ad] OR Milan[ad] OR Milano[ad] OR Naples[ad] OR Napoli[ad] OR Turin[ad] OR Torino[ad] OR Palermo[ad] OR Genoa[ad] OR Genova[ad] OR Bologna[ad] OR Florence[ad] OR Firenze[ad] OR Bari[ad] OR Catania[ad]) OR (Ireland[ad] OR Eire[ad] OR Irish\*[ad] OR Fingal[ad] OR "Fine Gall"[ad] OR Dublin[ad] OR "Ath Cliath"[ad] OR "Dun Laoghaire"[ad] OR Wicklow[ad] OR "Cill Mhantain"[ad] OR "Chill Mhantain"[ad] OR Wexford[ad] OR "Loch Garman"[ad] OR Carlow[ad] OR Ceatharlach[ad] OR Kildare[ad] OR "Cill Dara"[ad] OR "Chill Dara"[ad] OR Meath[ad] OR "An Mhi"[ad] OR "Contae na Mi"[ad] OR Louth[ad] OR "Contae Lu"[ad] OR Monaghan[ad] OR Muineachan[ad] OR Mhuineachain[ad] OR Cavan[ad] OR "An Cabhan"[ad] OR "An Cabhain"[ad] OR Longford[ad] OR "An Longfort"[ad] OR "an Longfoirt"[ad] OR Langfurd[ad] OR Westmeath[ad] OR "An Iarmhi"[ad] OR "na Iarmhi"[ad] OR Offaly[ad] OR "Uibh Fhaili"[ad] OR Laois[ad] OR Laoise[ad] OR Kilkenny[ad] OR "Chill Chainnigh"[ad] OR "Cill Chainnigh"[ad] OR Waterford[ad] OR "Port Lairge"[ad] OR Watterford[ad] OR Cork[ad] OR Corcaigh[ad] OR Chorcaí[ad] OR Kerry[ad] OR Ciarraí[ad] OR Chiarraí[ad] OR Limerick[ad] OR Luimneach[ad] OR Luimnigh[ad] OR Tipperary[ad] OR "Tiobraid Arann"[ad] OR "Thiobraid Arann"[ad] OR Clare[ad] OR "An Clar"[ad] OR "an Chlair"[ad] OR Galway[ad] OR Gaillimh[ad] OR "na Gaillimhe"[ad] OR Mayo[ad] OR "Maigh Eo"[ad] OR "Mhaigh Eo"[ad] OR Roscommon[ad] OR "Ros comain"[ad] OR Sligo[ad] OR Sligeach[ad] OR Shligigh[ad] OR Leitrim[ad] OR Liatroim[ad] OR Liatroma[ad] OR Donegal[ad] OR "Dhun na nGall"[ad] OR Dinnygal[ad] OR Dunnyga[ad] OR Leinster[ad] OR Laighin[ad] OR "Cuige Laighean"[ad] OR Munster[ad] OR Mumhain[ad] OR "Cuige Mumhan"[ad] OR Connacht[ad] OR Connachta[ad] OR Drogheda[ad] OR "Droichead Atha"[ad] OR Dundalk[ad] OR "Dun Dealgan"[ad] OR Swords[ad] OR Sord[ad] OR Bray[ad] OR Bre[ad] OR Navan[ad] OR "An Uaimh"[ad]) OR (Hungar\*[ad] OR Magyarország[ad] OR Magyar\*[ad] OR Dunantuli[ad] OR Transdanubia[ad] OR Dunantul[ad] OR "Great Plain"[ad] OR "Eszak Alföld"[ad] OR "Del Alföld"[ad] OR "Alföld es eszak"[ad] OR "Northern Alföld"[ad] OR "North Alföld"[ad] OR "South Alföld"[ad] OR "Southern Alföld"[ad] OR Bacs[ad] OR Kiskun[ad] OR Baranya[ad] OR Bekes[ad] OR Borsod[ad] OR Abauj[ad] OR Zemplen[ad] OR Budapest[ad] OR Csongrad[ad] OR Fejer[ad] OR győr[ad] OR moson[ad] OR sopron[ad] OR hajdu[ad] OR bihar[ad] OR Heves[ad] OR "jász nagykun szolnok"[ad] OR komárom[ad] OR esztergom[ad] OR Nograd[ad] OR (Pest[ad] AND (megye[ad] OR county[ad])) OR Somogy[ad] OR szabolcs[ad] OR szatmar[ad] OR bereg[ad] OR Tolna[ad] OR Vas[ad] OR Veszprem[ad] OR Zala[ad] OR Debrecen[ad] OR Miskolc[ad] OR Szeged[ad] OR Pecs[ad] OR Győr[ad] OR Nyiregyhaza[ad] OR Kecskemet[ad] OR Szekesfehervar[ad] OR Szombathely[ad]) OR (Greece[ad] OR "Hellenic republic"[ad] OR Greek\*[ad] OR Ellada[ad] OR Elladas[ad] OR "Elliniki

Dimokratia[ad] OR Hellas[ad] OR Hellenes[ad] OR Attica[ad] OR Attiki[ad] OR Makedonia\*[ad] OR Macedonia[ad] OR Thraki[ad] OR Thrace[ad] OR Crete[ad] OR Kriti[ad] OR "Ionia Nisia"[ad] OR "Ionion neson"[ad] OR "Ionion nIson"[ad] OR "Ionian islands"[ad] OR "Ionian island"[ad] OR Epirus[ad] OR Ipeiros[ad] OR "Perifereia Ipeirou"[ad] OR "North aegean"[ad] OR "Northern Aegean"[ad] OR "Aegean islands"[ad] OR "Aegean island"[ad] OR "NisoI Agaiou"[ad] OR "Notio Aigaio"[ad] OR Peloponnese[ad] OR Peloponniso\*[ad] OR Thessaly[ad] OR Thessalia[ad] OR Thessalian[ad] OR Petthalia[ad] OR "Voreio Aigaio"[ad] OR "Voreio Agaiou"[ad] OR "South aegean"[ad] OR "Southern Aegean"[ad] OR "Mount athos"[ad] OR "Oros Athos"[ad] OR Cyclades[ad] OR Cycklades[ad] OR Kiklades[ad] OR Dodecanese[ad] OR Dodekanisa[ad] OR Athens[ad] OR Athina[ad] OR Thessaloniki[ad] OR Thessalonica[ad] OR Patras[ad] OR Patra[ad] OR Pireas[ad] OR Piraeus[ad] OR Larissa[ad] OR Larisa[ad] OR Heraklion[ad] OR Heraclion[ad] OR Iraklion[ad] OR Irakleion[ad] OR Iraklio[ad] OR Volos[ad] OR Rhodes[ad] OR Rodos[ad] OR Ioannina[ad] OR Janina[ad] OR Yannena[ad] OR Chania[ad] OR Chalcis[ad] OR Chalkida[ad] OR (German\*[ad] OR Deutsch\*[ad] OR Bundesrepublik[ad] OR Westdeutschland[ad] OR Ostdeutschland[ad] OR Baden[ad] OR Wuerttemberg[ad] OR Wurttemberg[ad] OR Bayern[ad] OR Bavaria[ad] OR Berlin[ad] OR Brandenburg[ad] OR Bremen[ad] OR Oldenburg[ad] OR Mitteldeutschland[ad] OR Rhein[ad] OR Rhine[ad] OR Hannover[ad] OR Braunschweig[ad] OR Gottingen[ad] OR Goettingen[ad] OR Nurnberg[ad] OR Nuernberg[ad] OR Ruhr[ad] OR Koln[ad] OR koeln[ad] OR Bonn[ad] OR Hamburg[ad] OR Hessen[ad] OR Hesse[ad] OR Hessia[ad] OR Mecklenburg[ad] OR Vorpommern[ad] OR Pomerania[ad] OR Niedersachsen[ad] OR Neddertsassen[ad] OR Saxony[ad] OR Niederbayern[ad] OR "Northern Rhine"[ad] OR "North Rhine"[ad] OR Westphalia[ad] OR Westfalen[ad] OR "Rhineland Palatinate"[ad] OR "Rheinland Pfalz"[ad] OR Saarland[ad] OR Sachsen[ad] OR "Schleswig Holstein"[ad] OR Thuringia[ad] OR Thuringen[ad] OR Thueringen[ad] OR Munchen[ad] OR Muenchen[ad] OR Munich[ad] OR Frankfurt[ad] OR Stuttgart[ad] OR Dusseldorf[ad] OR Duesseldorf[ad] OR Dortmund[ad] OR Essen[ad]) OR (France[ad] OR French\*[ad] OR Francais\*[ad] OR Alsace[ad] OR Elsass[ad] OR Aquitaine[ad] OR Aquitania[ad] OR Akitania[ad] OR Aguiene[ad] OR Auvergne[ad] OR Auvernhe[ad] OR Auvernha[ad] OR Normandie[ad] OR Normandy[ad] OR Normaundie[ad] OR Bourgogne[ad] OR Burgundy[ad] OR Bregogne[ad] OR Borgogegne[ad] OR Borgogne[ad] OR Brittany[ad] OR Breizh[ad] OR Bertaeyn[ad] OR Bretagne[ad] OR "Champagne Ardenne"[ad] OR Corse[ad] OR Corsica[ad] OR "Franche Comte"[ad] OR "Frantche Comte"[ad] OR "Franche Comtat"[ad] OR Guadeloupe[ad] OR Guyane[ad] OR Guiana[ad] OR "Languedoc Roussillon"[ad] OR "Lengadoc Rosselhon"[ad] OR "Llenguadoc-Rossello"[ad] OR Limousin[ad] OR Lemosin[ad] OR Lorraine[ad] OR Lothringen[ad] OR Lottringe[ad] OR Martinique[ad] OR "Midi Pyrenees"[ad] OR "Miegjorn Pireneus"[ad] OR "Mieidia Pireneus"[ad] OR "Mediodia Pirineos"[ad] OR "Pays de la Loire"[ad] OR "Broiou al Liger"[ad] OR Picardie[ad] OR Picardy[ad] OR "Poitou Charentes"[ad] OR "Peitau Charantas"[ad] OR "Poitou-Cherentes"[ad] OR Provence[ad] OR Provenca[ad] OR Prouvenco[ad] OR "Cote d Azur"[ad] OR "Cote d'Azur"[ad] OR "Costo d'Azur"[ad] OR "Costo d Azur"[ad] OR "Costa d'Azur"[ad] OR "Costa d Azur"[ad] OR Reunion[ad] OR "Rhone Alpes"[ad] OR "Rono Arpes"[ad] OR "Rose Aups"[ad] OR Ain[ad] OR Aisne[ad] OR Allier[ad] OR "Alpes de Haute Provence"[ad] OR "Haute Alpes"[ad] OR "Alpes Maritimes"[ad] OR Ardeche[ad] OR Ardennes[ad] OR Ariege[ad] OR Aube[ad] OR Aude[ad] OR Aveyron[ad] OR "Bas Rhin"[ad] OR "Bouches du Rhone"[ad] OR Calvados[ad] OR Cantal[ad] OR Charente[ad] OR Cher[ad] OR Correze[ad] OR "Corse du Sud"[ad] OR "Cote d Or"[ad] OR "Cote d'Or"[ad] OR "Cotes d Armor"[ad] OR "Cotes d'Armor"[ad] OR Creuse[ad] OR "Deux Sevres"[ad] OR Dordogne[ad] OR Doubs[ad] OR Drome[ad] OR Essonne[ad] OR Eure[ad] OR Finistere[ad] OR Gard[ad] OR Gers[ad] OR Gironde[ad] OR "Haute Corse"[ad] OR "Haute Garonne"[ad] OR "Haute Marne"[ad] OR "Hautes Alpes"[ad] OR "Haute Saone"[ad] OR "Haute Savoie"[ad] OR "Hautes Pyrenees"[ad] OR "Haute Vienne"[ad] OR "Haut Rhin"[ad] OR "Hauts de Seine"[ad] OR Herault[ad] OR "Ile de France"[ad] OR

"Ille et Vilaine"[ad] OR Indre[ad] OR Isere[ad] OR Jura[ad] OR Landes[ad] OR Loire[ad] OR Loiret[ad] OR (Lot[ad] AND (departement[ad] OR department[ad])) OR "Lot et Garonne"[ad] OR "Loir et Cher"[ad] OR Lozere[ad] OR Manche[ad] OR Marne[ad] OR Mayenne[ad] OR Mayotte[ad] OR "Meurthe et Moselle"[ad] OR Meuse[ad] OR Morbihan[ad] OR Moselle[ad] OR (Nord[ad] AND (department[ad] OR departement[ad])) OR Nievre[ad] OR Oise[ad] OR Orne[ad] OR "Pas de calais"[ad] OR "Noord-Nauw van Kales"[ad] OR Paris[ad] OR "Puy de dome"[ad] OR "Pyrenees Atlantiques"[ad] OR "Pyrenees Orientales"[ad] OR Rhone[ad] OR Sarthe[ad] OR Savoie[ad] OR "Seine et Marne"[ad] OR "Seine Maritime"[ad] OR Somme[ad] OR Tarn[ad] OR "Territoire de Belfort"[ad] OR "Val de Marne"[ad] OR "Val d Oise"[ad] OR Var[ad] OR Vaucluse[ad] OR Vendee[ad] OR Vienne[ad] OR Vosges[ad] OR Yonne[ad] OR Yvelines[ad] OR Marseille[ad] OR Lyon[ad] OR Nice[ad] OR Nantes[ad] OR Strasbourg[ad] OR Montpellier[ad] OR Bordeaux[ad] OR Lille[ad] OR Toulouse[ad] OR "Outre Mer"[ad] OR "Seine Saint Denis"[ad] OR (Finland[ad] OR Finnish\*[ad] OR Finn[ad] OR Finns[ad] OR Suomi[ad] AND Suomen[ad] OR Suomalaiset[ad] OR Aland[ad] OR Ahvenanmaa[ad] OR Uusimaa[ad] OR Nyland[ad] OR Karelia[ad] OR Karjala[ad] OR Karelen[ad] OR Ostrobothnia[ad] OR Pohjanmaa[ad] OR Osterbotten[ad] OR Savonia[ad] OR Savo[ad] OR Savolax[ad] OR Kainuu[ad] OR Kajanaland\*[ad] OR "Kanta Hame"[ad] OR Tavastia[ad] OR Tavastland[ad] OR Kymenlaakso[ad] OR Kymmenedalen[ad] OR Lapland[ad] OR Lappi[ad] OR Lappland[ad] OR "Paijat Hame"[ad] OR Pirkanmaa[ad] OR Birkaland[ad] OR Satakunta[ad] OR Satakunda[ad] OR Helsinki[ad] OR Helsingfors[ad] OR Espoo[ad] OR Esbo[ad] OR Tampere[ad] OR Tammerfors[ad] OR Vantaa[ad] OR Vanda[ad] OR Oulu[ad] OR Uleaborg[ad] OR Turku[ad] OR Abo[ad] OR Jyvaskyla[ad] OR Kuopio[ad] OR Lahti[ad] OR Lahtis[ad] OR Kouvola[ad]) OR (Estonia\*[ad] OR Eesti[ad] OR Eestlased[ad] OR Eestlane[ad] OR Harju[ad] OR Harjumaa[ad] OR Hiiu[ad] OR Hiiumaa[ad] OR "Ida Viru"[ad] OR "Ida Virumaa"[ad] OR Jarvamaa[ad] OR Jarva[ad] OR Jogevas[ad] OR Jogeva[ad] OR Laanemaa[ad] OR Laane[ad] OR "Laane Virumaa"[ad] OR Parnu[ad] OR Parnumaa[ad] OR Polva[ad] OR Polvamaa[ad] OR Rapla[ad] OR Raplamaa[ad] OR Saare[ad] OR Saaremaa[ad] OR Tartu[ad] OR Tartumaa[ad] OR Valga[ad] OR Valgamaa[ad] OR Viljandimaa[ad] OR Viljandi[ad] OR Voru[ad] OR Vorumaa[ad] OR Tallinn[ad] OR Narva[ad] OR "Kohtla Jarve"[ad] OR Rakvere[ad] OR Maardu[ad] OR Sillamae[ad] OR Kuressaare[ad]) OR (Denmark[ad] OR Danish\*[ad] OR dane[ad] OR danes[ad] OR Danmark[ad] OR dansk\*[ad] OR Hovedstaden[ad] OR Midtjylland[ad] OR Nordjylland[ad] OR Sjaelland[ad] OR Sealand[ad] OR "Zealand region"[ad] OR "region Zealand"[ad] OR Syddanmark[ad] OR Jutland[ad] OR Jylland[ad] OR Sonderjyllands[ad] OR Copenhagen[ad] OR Kobenhavn[ad] OR Arhus[ad] OR Aarhus[ad] OR Bornholm[ad] OR Frederiksberg[ad] OR Frederiksborg[ad] OR Ringkjobing[ad] OR Viborg[ad] OR Vejle[ad] OR Roskilde[ad] OR Storstrom[ad] OR Vestsjaellands[ad] OR "West Zealand"[ad] OR Funen[ad] OR Ribe[ad] OR "Kalaallit Nunaat"[ad] OR Gronland[ad] OR Foroyar[ad] OR Faeroerne[ad] OR "Faroe islands"[ad] OR Aalborg[ad] OR Alborg[ad] OR Odense[ad] OR Esbjerg[ad] OR Gentofte[ad] OR Gladsaxe[ad] OR Randers[ad] OR Kolding[ad]) OR (Czech\*[ad] OR Cesky[ad] OR Ceska[ad] OR Cech[ad] OR Cestina[ad] OR Prague[ad] OR Praha[ad] OR Prag[ad] OR Stredoces\*[ad] OR Jihoces\*[ad] OR Bohemia[ad] OR Bohemian[ad] OR Plzen\*[ad] OR Pilsen[ad] OR Karlovars\*[ad] OR "Karlovy Vary"[ad] OR Usteck\*[ad] OR Usti[ad] OR Liberec\*[ad] OR "Hradec Kralove"[ad] OR Kralovehradec\*[ad] OR Pardubic\*[ad] OR Olomouc\*[ad] OR Olomoc[ad] OR Holomoc[ad] OR Moravskoslezs\*[ad] OR Jihomorav\*[ad] OR Moravia[ad] OR Moravian[ad] OR Morava[ad] OR Vysocina[ad] OR Zlin[ad] OR Zlinsk\*[ad] OR "Ceske Budejovice"[ad] OR Budweis[ad] OR Brno[ad] OR Ostrava[ad]) OR (Cyprus[ad] OR Cypriot\*[ad] OR Kypros[ad] OR Kibris\*[ad] OR kypriaki[ad] OR Kyprioi[ad] OR Nicosia[ad] OR Lefkosa[ad] OR Lefkosia[ad] OR Famagusta[ad] OR Magusa[ad] OR Ammochostos[ad] OR Gazimagusa[ad] OR Kyrenia[ad] OR Girne[ad] OR Keryneia[ad] OR Larnaca[ad] OR Larnaka[ad] OR Iskele[ad] OR Limassol[ad] OR Lemesos[ad] OR Limasol[ad] OR Leymosun[ad] OR Paphos[ad] OR Pafos[ad] OR Baf[ad] OR Strovolos[ad] OR Lakatamia[ad] OR Lakadamyia[ad] OR "Kato Polemidia"[ad] OR



|     |                                                                                                                                                                                                                                                                                                                                                                                                                                                                                                                                                                                                                                                                                                                                                                                                                                                                                                                                                                                                                                                                                                                                                                                                                                                                                                                                                                                                                                                                                                                                                                                                                                                                                                                                                                                                                                                                                                                                                                                                                                                                                                                                                                                                                                                                                                                                                                                                                                                                                                                                                                                                                                                                                                                                                                                                                                                                                                                                                                                                                                                                                                                                                                                                                                                                                                                                                |        |
|-----|------------------------------------------------------------------------------------------------------------------------------------------------------------------------------------------------------------------------------------------------------------------------------------------------------------------------------------------------------------------------------------------------------------------------------------------------------------------------------------------------------------------------------------------------------------------------------------------------------------------------------------------------------------------------------------------------------------------------------------------------------------------------------------------------------------------------------------------------------------------------------------------------------------------------------------------------------------------------------------------------------------------------------------------------------------------------------------------------------------------------------------------------------------------------------------------------------------------------------------------------------------------------------------------------------------------------------------------------------------------------------------------------------------------------------------------------------------------------------------------------------------------------------------------------------------------------------------------------------------------------------------------------------------------------------------------------------------------------------------------------------------------------------------------------------------------------------------------------------------------------------------------------------------------------------------------------------------------------------------------------------------------------------------------------------------------------------------------------------------------------------------------------------------------------------------------------------------------------------------------------------------------------------------------------------------------------------------------------------------------------------------------------------------------------------------------------------------------------------------------------------------------------------------------------------------------------------------------------------------------------------------------------------------------------------------------------------------------------------------------------------------------------------------------------------------------------------------------------------------------------------------------------------------------------------------------------------------------------------------------------------------------------------------------------------------------------------------------------------------------------------------------------------------------------------------------------------------------------------------------------------------------------------------------------------------------------------------------------|--------|
|     | <p>"Kato Polemidhia"[ad] OR Aglandjia[ad] OR Eglence[ad] OR Aglantzia[ad] OR Aradhippou[ad] OR Aradippou[ad] OR Engomi[ad] OR (Croat*[ad] OR Hrvatsk*[ad] OR hrvati[ad] OR Bjelovar[ad] OR "Bjelovarsko bilogorska"[ad] OR "Brod Posavina"[ad] OR "Brodsko posavska"[ad] OR "Dubrovnik Neretva"[ad] OR "dubrovačko neretvanska"[ad] OR Zagreb[ad] OR Zagrebacka[ad] OR Istria[ad] OR Istarska[ad] OR Karlovacka[ad] OR Karlovac[ad] OR "Koprivnicko krizevacka"[ad] OR Koprivnica[ad] OR Krizevci[ad] OR "Krapina Zagorje"[ad] OR "Krapinsko zagorska"[ad] OR "Lika Senj"[ad] OR "Licko senjska"[ad] OR Medimurska[ad] OR Medimurje[ad] OR Osijek[ad] OR Baranja[ad] OR "Osječko baranjska"[ad] OR "Pozega Slavonia"[ad] OR "Pozesko slavonska"[ad] OR "Primorje Gorski Kotar"[ad] OR "Primorsko goranska"[ad] OR "Sibensko kninska"[ad] OR "Sibensko kninske"[ad] OR Sibenik[ad] OR Knin[ad] OR Sisak[ad] OR "Sisacko moslavacka"[ad] OR Moslavina[ad] OR "Splitsko dalmatinska"[ad] OR Split[ad] OR Dalmatia[ad] OR Varazdin[ad] OR Varazdinska[ad] OR Viroviticko[ad] OR podravska[ad] OR Virovitica[ad] OR Podravina[ad] OR "Vukovarsko srijemska"[ad] OR Vukovar[ad] OR Srijem[ad] OR Zadar[ad] OR Zadarska[ad] OR Rijeka[ad] OR "Velika gorica"[ad] OR "Slavonski brod"[ad] OR Pula[ad] OR (Bulgaria*[ad] OR Balgariya[ad] OR Balgarija[ad] OR Blagoevgrad*[ad] OR "Pirin Macedonia"[ad] OR Burgas[ad] OR Dobrich[ad] OR Gabrovo[ad] OR Haskovo[ad] OR Kardzhali[ad] OR Kurdzhali[ad] OR Kyustendil[ad] OR Lovech[ad] OR Lovec[ad] OR Montana[ad] OR Pazardzhik[ad] OR Pernik[ad] OR Pleven*[ad] OR Plovdiv[ad] OR Razgrad[ad] OR Rousse[ad] OR Ruse[ad] OR Rusenka[ad] OR Shumen[ad] OR Silistra[ad] OR Sliven[ad] OR Smolyan[ad] OR Sofia[ad] OR Sofyiska[ad] OR Sofiiska[ad] OR "Stara Zagora"[ad] OR Targovishte[ad] OR Varna[ad] OR "Veliko Tarnovo"[ad] OR Vidin[ad] OR Vratsa[ad] OR Vratza[ad] OR Yambol[ad] OR (Belgi*[ad] OR Belge*[ad] OR Belg[ad] OR Brussel*[ad] OR Bruxelles[ad] OR Bruxelloise[ad] OR Walloon*[ad] OR Wallon*[ad] OR Vlaams[ad] OR Flander*[ad] OR Flandern[ad] OR Flandre[ad] OR Flemish[ad] OR Flamand[ad] OR Flemisch[ad] OR Flamisch*[ad] OR Vlaanderen[ad] OR Flamande[ad] OR Waals[ad] OR Antwerp*[ad] OR Anvers[ad] OR Henegouwen[ad] OR Hennegau[ad] OR Hainault[ad] OR Hainaut[ad] OR Liege[ad] OR Luik[ad] OR Luttich[ad] OR Limbourg[ad] OR Limburg[ad] OR Namur[ad] OR Namen[ad] OR Ostflandern[ad] OR Westflandern[ad] OR Ghent[ad] OR Gent[ad] OR Gand[ad] OR Charleroi[ad] OR Bruges[ad] OR Brugge*[ad] OR Schaerbeek[ad] OR Schaarbeek[ad] OR Anderlecht[ad] OR Leuven[ad] OR Louvain[ad] OR (Austria*[ad] OR Osterreich*[ad] OR Oesterreich*[ad] OR Ostosterreich[ad] OR Ostoesterreich[ad] OR Sudosterreich[ad] OR Sudoesterreich[ad] OR Westosterreich[ad] OR Westoesterreich[ad] OR Burgenland[ad] OR Carinthia[ad] OR Karnten[ad] OR Kaernten[ad] OR Niederosterreich[ad] OR Niederoesterreich[ad] OR Oberosterreich[ad] OR Oberoesterreich[ad] OR Salzburg[ad] OR Saizburg[ad] OR Styria[ad] OR Steiermark[ad] OR Tyrol[ad] OR Tirol[ad] OR Vorarlberg[ad] OR Vienna[ad] OR Wien[ad] OR Graz[ad] OR Linz[ad] OR Innsbruck[ad] OR Klagenfurt[ad] OR Villach[ad] OR Wels[ad] OR "St Polten"[ad] OR "St Poelten"[ad] OR "Sankt Polten"[ad] OR "Sankt Poelten"[ad] OR Dornbirn[ad])</p> |        |
| #16 | <p>Search (Iceland[ad] OR Icelandic*[ad] OR islenska*[ad] OR Icelander*[ad] OR islendinga*[ad] OR Islendigar[ad] OR Insenska[ad] OR Reykjavik[ad] OR Reykjavikurborg[ad] OR Hofudborgarsvaedi[ad] OR Sudurnes[ad] OR Vesturland[ad] OR Vestfirðir[ad] OR Westfjords[ad] OR Nordurland[ad] OR Austurland[ad] OR Sudurland[ad] OR Kopavogur[ad] OR Hafnarfjörður[ad] OR Akureyri[ad] OR Gardabaer[ad] OR Mosfellsbaer[ad] OR Keflavik[ad] OR Akranes[ad] OR Selfoss[ad] OR Seltjarnarnes[ad] OR (Switzerland[ad] OR Schweiz[ad] OR Schweizerische[ad] OR Swiss[ad] OR Suisse*[ad] OR Svizzera[ad] OR Svizzeri[ad] OR Svizzers[ad] OR Svizra[ad] OR Helvetica[ad] OR Aargau[ad] OR Argovia[ad] OR Ausserrhoden[ad] OR "Outer Rhodes"[ad] OR Innerrhoden[ad] OR "Inner Rhodes"[ad] OR Basel[ad] OR Bale[ad] OR Basilea[ad] OR Bern[ad] OR Berne[ad] OR Berna[ad] OR Fribourg[ad] OR Freiburg[ad] OR Friburg[ad] OR Geneva[ad] OR Geneve[ad] OR Genf[ad] OR</p>                                                                                                                                                                                                                                                                                                                                                                                                                                                                                                                                                                                                                                                                                                                                                                                                                                                                                                                                                                                                                                                                                                                                                                                                                                                                                                                                                                                                                                                                                                                                                                                                                                                                                                                                                                                                                                                                                                                                                                                                                                                                                                                                                                                                                                                                                                                                                                                     | 460830 |

|     |                                                                                                                                                                                                                                                                                                                                                                                                                                                                                                                                                                                                                                                                                                                                                                                                                                                                                                                                                                                                                                                                                                                                                                                                                                                                                                                                                                                                                                                                                                                                                                                                                                                                                                                                                                                                                                                                                                                                                                                                                                                                                                                                                                                                                                                                                                                                                                                                                                                                                                                                                                                                    |        |
|-----|----------------------------------------------------------------------------------------------------------------------------------------------------------------------------------------------------------------------------------------------------------------------------------------------------------------------------------------------------------------------------------------------------------------------------------------------------------------------------------------------------------------------------------------------------------------------------------------------------------------------------------------------------------------------------------------------------------------------------------------------------------------------------------------------------------------------------------------------------------------------------------------------------------------------------------------------------------------------------------------------------------------------------------------------------------------------------------------------------------------------------------------------------------------------------------------------------------------------------------------------------------------------------------------------------------------------------------------------------------------------------------------------------------------------------------------------------------------------------------------------------------------------------------------------------------------------------------------------------------------------------------------------------------------------------------------------------------------------------------------------------------------------------------------------------------------------------------------------------------------------------------------------------------------------------------------------------------------------------------------------------------------------------------------------------------------------------------------------------------------------------------------------------------------------------------------------------------------------------------------------------------------------------------------------------------------------------------------------------------------------------------------------------------------------------------------------------------------------------------------------------------------------------------------------------------------------------------------------------|--------|
|     | <p>Ginevra[ad] OR Genevra[ad] OR Glarus[ad] OR Graubunden[ad] OR Graubuenden[ad] OR Grisons[ad] OR Grigioni[ad] OR Grischun[ad] OR jura[ad] OR Lucerne[ad] OR Luzern[ad] OR Losanna[ad] OR Neuchatel[ad] OR Nidwalden[ad] OR Nidwald[ad] OR Obwalden[ad] OR Obwald[ad] OR Schaffhausen[ad] OR Schaffhouse[ad] OR Schwyz[ad] OR Solothurn[ad] OR Soleure[ad] OR Thurgau[ad] OR Thurgovia[ad] OR Ticino[ad] OR Tessin[ad] OR Uri[ad] OR Valais[ad] OR Wallis[ad] OR Vaud[ad] OR Zug[ad] OR Zurich[ad] OR Zuerich[ad] OR Zurigo[ad] OR Lausanne[ad] OR Losanna[ad] OR Winterthur[ad] OR Winterthur[ad] OR "St Gallen"[ad] OR "Saint Gallen"[ad] OR "Sankt Gallen"[ad] OR "Saint Gall"[ad] OR "San Gallo"[ad] OR "Son Gagl"[ad] OR Turitg[ad]) OR (Norway[ad] OR Norwegian*[ad] OR Norge[ad] OR Noreg[ad] OR Norgga[ad] OR Akershus[ad] OR "Aust Agder"[ad] OR Buskerud[ad] OR Finnmark[ad] OR Hedmark[ad] OR Hordaland[ad] OR "More og Romsdal"[ad] OR "More and Romsdal"[ad] OR "More Romsdal"[ad] OR Nordland[ad] OR Trondelag[ad] OR Oppland[ad] OR Oslo[ad] OR Ostfold[ad] OR Rogaland[ad] OR "Sogn og fjordane"[ad] OR "Sogn and fjordane"[ad] OR "sogn fjordane"[ad] OR Telemark[ad] OR Troms[ad] OR Romsa[ad] OR Romssa[ad] OR "Vest Agder"[ad] OR Vestfold[ad] OR Bergen[ad] OR Stavanger[ad] OR Sandnes[ad] OR Trondheim[ad] OR Trondhjem[ad] OR Kaupangen[ad] OR Nidaros[ad] OR Drammen[ad] OR Fredrikstad[ad] OR Skien[ad] OR Tromso[ad] OR Sarpsborg[ad]) OR (Liechtenstein[ad] OR Lienchtensteiner*[ad] OR Balzers[ad] OR Eschen[ad] OR Gamprin[ad] OR Mauren[ad] OR Planken[ad] OR Ruggell[ad] OR Schaan[ad] OR Schellenberg[ad] OR Triesen[ad] OR Triesenberg[ad] OR Vaduz[ad])</p>                                                                                                                                                                                                                                                                                                                                                                                                                                                                                                                                                                                                                                                                                                                                                                                                                                                                                                    |        |
| #17 | <p>Search ("Liechtenstein"[Mesh] OR Liechtenstein[tw] OR Lienchtensteiner*[tw] OR Balzers[tw] OR Eschen[tw] OR Gamprin[tw] OR Mauren[tw] OR Planken[tw] OR Ruggell[tw] OR Schaan[tw] OR Schellenberg[tw] OR Triesen[tw] OR Triesenberg[tw] OR Vaduz[tw])) OR ("Norway"[Mesh] OR Norway[tw] OR Norwegian*[tw] OR Norge[tw] OR Noreg[tw] OR Norgga[tw] OR Akershus[tw] OR "Aust Agder"[tw] OR Buskerud[tw] OR Finnmark[tw] OR Hedmark[tw] OR Hordaland[tw] OR "More og Romsdal"[tw] OR "More and Romsdal"[tw] OR "More Romsdal"[tw] OR Nordland[tw] OR Trondelag[tw] OR Oppland[tw] OR Oslo[tw] OR Ostfold[tw] OR Rogaland[tw] OR "Sogn og fjordane"[tw] OR "Sogn and fjordane"[tw] OR "sogn fjordane"[tw] OR Telemark[tw] OR Troms[tw] OR Romsa[tw] OR Romssa[tw] OR "Vest Agder"[tw] OR Vestfold[tw] OR Bergen[tw] OR Stavanger[tw] OR Sandnes[tw] OR Trondheim[tw] OR Trondhjem[tw] OR Kaupangen[tw] OR Nidaros[tw] OR Drammen[tw] OR Fredrikstad[tw] OR Skien[tw] OR Tromso[tw] OR Sarpsborg[tw])) OR ("Switzerland"[Mesh] OR Switzerland[tw] OR Schweiz[tw] OR Schweizerische[tw] OR Swiss[tw] OR Suisse*[tw] OR Svizzera[tw] OR Svizzeri[tw] OR Svizzers[tw] OR Svizra[tw] OR Helvetica[tw] OR Aargau[tw] OR Argovia[tw] OR Ausserrhoden[tw] OR "Outer Rhodes"[tw] OR Innerrhoden[tw] OR "Inner Rhodes"[tw] OR Basel[tw] OR Bale[tw] OR Basilea[tw] OR Bern[tw] OR Berne[tw] OR Berna[tw] OR Fribourg[tw] OR Freiburg[tw] OR Friburg[tw] OR Geneva[tw] OR Geneve[tw] OR Genf[tw] OR Ginevra[tw] OR Genevra[tw] OR Glarus[tw] OR Graubunden[tw] OR Graubuenden[tw] OR Grisons[tw] OR Grigioni[tw] OR Grischun[tw] OR jura[tw] OR Lucerne[tw] OR Luzern[tw] OR Losanna[tw] OR Neuchatel[tw] OR Nidwalden[tw] OR Nidwald[tw] OR Obwalden[tw] OR Obwald[tw] OR Schaffhausen[tw] OR Schaffhouse[tw] OR Schwyz[tw] OR Solothurn[tw] OR Soleure[tw] OR Thurgau[tw] OR Thurgovia[tw] OR Ticino[tw] OR Tessin[tw] OR Uri[tw] OR Valais[tw] OR Wallis[tw] OR Vaud[tw] OR Zug[tw] OR Zurich[tw] OR Zuerich[tw] OR Zurigo[tw] OR Lausanne[tw] OR Losanna[tw] OR Winterthur[tw] OR Winterthur[tw] OR "St Gallen"[tw] OR "Saint Gallen"[tw] OR "Sankt Gallen"[tw] OR "Saint Gall"[tw] OR "San Gallo"[tw] OR "Son Gagl"[tw] OR Turitg[tw])) OR ("Iceland"[Mesh] OR Iceland[tw] OR Icelandic*[tw] OR isenska*[tw] OR Icelander*[tw] OR islendinga*[tw] OR Islendigar[tw] OR Inslenska[tw] OR Reykjavik[tw] OR Reykjavikurborg[tw] OR Hofudborgarsvaedi[tw] OR Sudurnes[tw] OR Vesturland[tw] OR Vestfiridir[tw] OR Westfjords[tw] OR Nordurland[tw] OR Austurland[tw] OR Sudurland[tw] OR Kopavogur[tw] OR</p> | 160173 |

|     |                                                                                                                                                                                                                                                                                                                                                                                                                                                                                                                                                                                                                                                                                                                                                                                                                                                                                                                                                                                                                                                                                                                                                                                                                                                                                                                                                                                                                                                                                                                                                                                                                                                                                                                                                                                                                                                                                                                                                                                                                                                                                                                                                                                                                                                                                                                                                                                                                                                                                                                                                                                                                                                                                                                                                                                                                                                                                                                                                                                                                                                                                                                                                                                                                                                                                                                                                                                                                                                                                                                                                                                                                                                                                                                                                                                                                                                                                                                                                                                                                                                                                                                                   |         |
|-----|-----------------------------------------------------------------------------------------------------------------------------------------------------------------------------------------------------------------------------------------------------------------------------------------------------------------------------------------------------------------------------------------------------------------------------------------------------------------------------------------------------------------------------------------------------------------------------------------------------------------------------------------------------------------------------------------------------------------------------------------------------------------------------------------------------------------------------------------------------------------------------------------------------------------------------------------------------------------------------------------------------------------------------------------------------------------------------------------------------------------------------------------------------------------------------------------------------------------------------------------------------------------------------------------------------------------------------------------------------------------------------------------------------------------------------------------------------------------------------------------------------------------------------------------------------------------------------------------------------------------------------------------------------------------------------------------------------------------------------------------------------------------------------------------------------------------------------------------------------------------------------------------------------------------------------------------------------------------------------------------------------------------------------------------------------------------------------------------------------------------------------------------------------------------------------------------------------------------------------------------------------------------------------------------------------------------------------------------------------------------------------------------------------------------------------------------------------------------------------------------------------------------------------------------------------------------------------------------------------------------------------------------------------------------------------------------------------------------------------------------------------------------------------------------------------------------------------------------------------------------------------------------------------------------------------------------------------------------------------------------------------------------------------------------------------------------------------------------------------------------------------------------------------------------------------------------------------------------------------------------------------------------------------------------------------------------------------------------------------------------------------------------------------------------------------------------------------------------------------------------------------------------------------------------------------------------------------------------------------------------------------------------------------------------------------------------------------------------------------------------------------------------------------------------------------------------------------------------------------------------------------------------------------------------------------------------------------------------------------------------------------------------------------------------------------------------------------------------------------------------------------------|---------|
|     | Hafnarfjordur[tw] OR Akureyri[tw] OR Gardabaer[tw] OR Mosfellsbaer[tw] OR Keflavik[tw] OR Akranes[tw] OR Selfoss[tw] OR Seltjarnarnes[tw])                                                                                                                                                                                                                                                                                                                                                                                                                                                                                                                                                                                                                                                                                                                                                                                                                                                                                                                                                                                                                                                                                                                                                                                                                                                                                                                                                                                                                                                                                                                                                                                                                                                                                                                                                                                                                                                                                                                                                                                                                                                                                                                                                                                                                                                                                                                                                                                                                                                                                                                                                                                                                                                                                                                                                                                                                                                                                                                                                                                                                                                                                                                                                                                                                                                                                                                                                                                                                                                                                                                                                                                                                                                                                                                                                                                                                                                                                                                                                                                        |         |
| #18 | Search ("European Union"[Mesh] OR "Europe"[Mesh:noexp] OR Europe*[tw] OR Europa*[tw] OR EU[tw] OR EEA[tw] OR EFTA[tw] OR "EU/EEA"[tw] OR "EU/EFTA"[tw] OR ECSC[tw] OR Euratom[tw] OR Eurozone[tw] OR EEC[tw] OR ec[tw] OR (Schengen[tw] AND (area[tw] OR countr*[tw] OR region*[tw] OR state[tw] OR states[tw])) OR Euroregion[tw] OR Euroregions[tw] OR "Europe, Eastern"[Mesh:noexp] OR "Balkan Peninsula"[Mesh] OR Balkan[tw] OR Balkans[tw] OR "Baltic States"[Mesh] OR Baltic[tw] OR "Mediterranean Region"[Mesh] OR (Mediterranean[tw] AND (area[tw] OR countr*[tw] OR region*[tw] OR state[tw] OR states[tw]))) OR (Alpine[tw] AND (area[tw] OR countr*[tw] OR region*[tw] OR state[tw] OR states[tw]))) OR "Scandinavian and Nordic Countries"[Mesh] OR Scandinavia[tw] OR Scandinavian[tw] OR "Nordic country"[tw] OR "Nordic countries"[tw] OR "Nordic state"[tw] OR "Nordic states"[tw] OR Danubian[tw] OR "Iberian peninsula"[tw] OR "Peninsula iberica"[tw] OR "Peninsule Iberique"[tw] OR "Iberiar Penintsula"[tw] OR Iberia[tw] OR Anatolia[tw] OR Anadolu[tw] OR Anatole[tw] OR Anatolian[tw] OR "Yugoslavia"[Mesh] OR Yugoslavia[tw] OR "Czechoslovakia"[Mesh] OR Czechoslovakia[tw] OR "Czecho Slovakia"[tw] OR Ceskoslovensko[tw] OR "Cesko slovensko"[tw] OR Benelux[tw] OR Fennoscandia[tw] OR "Fenno Scandinavia"[tw] OR Fennoskandi*[tw] OR (Visegrad[tw] AND (Group[tw] OR Four[tw] OR Triangle[tw])) OR "Visegradska ctyrka"[tw] OR "Visegradska skupina"[tw] OR "Visegradi Egyuttmukodes"[tw] OR "Visegradi negyek"[tw] OR "Grupa Wyszehradzka"[tw] OR "Vysehradska skupina"[tw] OR "Vysehradska stvorka"[tw]) OR ("Austria"[Mesh] OR Austria*[tw] OR Osterreich*[tw] OR Oesterreich*[tw] OR Ostosterreich[tw] OR Ostoesterreich[tw] OR Sudosterreich[tw] OR Sudoesterreich[tw] OR Westosterreich[tw] OR Westoesterreich[tw] OR Burgenland[tw] OR Carinthia[tw] OR Karnten[tw] OR Kaernten[tw] OR Niederosterreich[tw] OR Niederoesterreich[tw] OR Oberosterreich[tw] OR Oberoesterreich[tw] OR Salzburg[tw] OR Saizburg[tw] OR Styria[tw] OR Steiermark[tw] OR Tyrol[tw] OR Tirol[tw] OR Vorarlberg[tw] OR Vienna[tw] OR Wien[tw] OR Graz[tw] OR Linz[tw] OR Innsbruck[tw] OR Klagenfurt[tw] OR Villach[tw] OR Wels[tw] OR "St Polten"[tw] OR "St Poelten"[tw] OR "Sankt Polten"[tw] OR "Sankt Poelten"[tw] OR Dornbirn[tw]) OR ("Belgium"[Mesh] OR Belgi*[tw] OR Belge*[tw] OR Belg[tw] OR Brussel*[tw] OR Bruxelles[tw] OR Bruxelloise[tw] OR Walloon*[tw] OR Wallon*[tw] OR Vlaams[tw] OR Flander*[tw] OR Flandern[tw] OR Flandre[tw] OR Flemish[tw] OR Flamand[tw] OR Flemisch[tw] OR Flamisch*[tw] OR Vlaanderen[tw] OR Flamande[tw] OR Waals[tw] OR Antwerp*[tw] OR Anvers[tw] OR Henegouwen[tw] OR Hennegau[tw] OR Hainault[tw] OR Hainaut[tw] OR Liege[tw] OR Luik[tw] OR Luttich[tw] OR Limbourg[tw] OR Limburg[tw] OR Namur[tw] OR Namen[tw] OR Ostflandern[tw] OR Westflandern[tw] OR Ghent[tw] OR Gent[tw] OR Gand[tw] OR Charleroi[tw] OR Bruges[tw] OR Brugge*[tw] OR Schaerbeek[tw] OR Schaarbeek[tw] OR Anderlecht[tw] OR Leuven[tw] OR Louvain[tw]) OR ("Bulgaria"[Mesh] OR Bulgaria*[tw] OR Balgariya[tw] OR Balgarija[tw] OR Blagoevgrad*[tw] OR "Pirin Macedonia"[tw] OR Burgas[tw] OR Dobrich[tw] OR Gabrovo[tw] OR Haskovo[tw] OR Kardzhali[tw] OR Kurdzhali[tw] OR Kyustendil[tw] OR Lovech[tw] OR Lovec[tw] OR Montana[tw] OR Pazardzhik[tw] OR Pernik[tw] OR Plevn*[tw] OR Plovdiv[tw] OR Razgrad[tw] OR Rousse[tw] OR Ruse[tw] OR Rusenka[tw] OR Shumen[tw] OR Silistra[tw] OR Sliven[tw] OR Smolyan[tw] OR Sofia[tw] OR Sofyiska[tw] OR Sofiiska[tw] OR "Stara Zagora"[tw] OR Targovishte[tw] OR Varna[tw] OR "Veliko Tarnovo"[tw] OR Vidin[tw] OR Vratsa[tw] OR Vratza[tw] OR Yambol[tw]) OR ("Croatia"[Mesh] OR Croat*[tw] OR Hrvatsk*[tw] OR hrvat[tw] OR Bjelovar[tw] OR "Bjelovarsko bilogorska"[tw] OR "Brod Posavina"[tw] OR "Brodsko posavska"[tw] OR "Dubrovnik Neretva"[tw] OR "dubroavacko neretvanska"[tw] OR Zagreb[tw] OR Zagrebacka[tw] OR Istria[tw] OR Istarska[tw] OR Karlovacka[tw] OR Karlovac[tw] OR "Koprivnicko krizevacka"[tw] OR Koprivnica[tw] OR | 3891570 |

Krizevci[tw] OR "Krapina Zagorje"[tw] OR "Krapinsko zagorska"[tw] OR "Lika Senj"[tw] OR "Licko senjska"[tw] OR Medimurska[tw] OR Medimurje[tw] OR Osijek[tw] OR Baranja[tw] OR "Osječko baranjska"[tw] OR "Pozega Slavonia"[tw] OR "Pozesko slavonska"[tw] OR "Primorje Gorski Kotar"[tw] OR "Primorsko goranska"[tw] OR "Sibensko kninska"[tw] OR "Sibensko kninske"[tw] OR Sibenik[tw] OR Knin[tw] OR Sisak[tw] OR "Sisacko moslavacka"[tw] OR Moslavina[tw] OR "Splitsko dalmatinska"[tw] OR Split[tw] OR Dalmatia[tw] OR Varazdin[tw] OR Varazdinska[tw] OR Viroviticko[tw] OR podravska[tw] OR Virovitica[tw] OR Podravina[tw] OR "Vukovarsko srijemska"[tw] OR Vukovar[tw] OR Srijem[tw] OR Zadar[tw] OR Zadarska[tw] OR Rijeka[tw] OR "Velika gorica"[tw] OR "Slavonski brod"[tw] OR Pula[tw]) OR ("Cyprus"[Mesh] OR Cyprus[tw] OR Cypriot\*[tw] OR Kypros[tw] OR Kibris\*[tw] OR kypriaki[tw] OR Kyprioi[tw] OR Nicosia[tw] OR Lefkosa[tw] OR Lefkosia[tw] OR Famagusta[tw] OR Magusa[tw] OR Ammochostos[tw] OR Gazimagusa[tw] OR Kyrenia[tw] OR Girne[tw] OR Keryneia[tw] OR Larnaca[tw] OR Larnaka[tw] OR Iskele[tw] OR Limassol[tw] OR Lemesos[tw] OR Limasol[tw] OR Leymosun[tw] OR Paphos[tw] OR Pafos[tw] OR Baf[tw] OR Strovolos[tw] OR Lakatamia[tw] OR Lakadamyia[tw] OR "Kato Polemidia"[tw] OR "Kato Polemidhia"[tw] OR Aglandjia[tw] OR Eglence[tw] OR Aglantzia[tw] OR Aradhippou[tw] OR Aradippou[tw] OR Engomi[tw]) OR ("Czech Republic"[Mesh] OR Czech\*[tw] OR Cesky[tw] OR Ceska[tw] OR Cech[tw] OR Cestina[tw] OR Prague[tw] OR Praha[tw] OR Prag[tw] OR Stredoces\*[tw] OR Jihoces\*[tw] OR Bohemia[tw] OR Bohemian[tw] OR Plzen\*[tw] OR Pilsen[tw] OR Karlovars\*[tw] OR "Karlovy Vary"[tw] OR Usteck\*[tw] OR Usti[tw] OR Liberec\*[tw] OR "Hradec Kralove"[tw] OR Kralovehradec\*[tw] OR Pardubic\*[tw] OR Olomouc\*[tw] OR Olomoc[tw] OR Holomoc[tw] OR Moravskoslezs\*[tw] OR Jihomorav\*[tw] OR Moravia[tw] OR Moravian[tw] OR Morava[tw] OR Vysocina[tw] OR Zlin[tw] OR Zlinsk\*[tw] OR "Ceske Budejovice"[tw] OR Budweis[tw] OR Brno[tw] OR Ostrava[tw]) OR ("Denmark"[Mesh] OR Denmark[tw] OR Danish\*[tw] OR dane[tw] OR danes[tw] OR Danmark[tw] OR dansk\*[tw] OR Hovedstaden[tw] OR Midtjylland[tw] OR Nordjylland[tw] OR Sjælland[tw] OR Sealand[tw] OR "Zealand region"[tw] OR "region Zealand"[tw] OR Syddanmark[tw] OR Jutland[tw] OR Jylland[tw] OR Sonderjyllands[tw] OR Copenhagen[tw] OR Kobenhavn[tw] OR Arhus[tw] OR Aarhus[tw] OR Bornholm[tw] OR Frederiksberg[tw] OR Frederiksborg[tw] OR Ringkjobing[tw] OR Viborg[tw] OR Vejle[tw] OR Roskilde[tw] OR Storstrom[tw] OR Vestsjaellands[tw] OR "West Zealand"[tw] OR Funen[tw] OR Ribe[tw] OR "Kalaallit Nunaat"[tw] OR Gronland[tw] OR Foroyar[tw] OR Faeroerne[tw] OR "Faroe islands"[tw] OR Aalborg[tw] OR Alborg[tw] OR Odense[tw] OR Esbjerg[tw] OR Gentofte[tw] OR Gladsaxe[tw] OR Randers[tw] OR Kolding[tw]) OR ("Estonia"[Mesh] OR Estonia\*[tw] OR Eesti[tw] OR Eestlased[tw] OR Eestlane[tw] OR Harju[tw] OR Harjumaa[tw] OR Hiiu[tw] OR Hiiumaa[tw] OR "Ida Viru"[tw] OR "Ida Virumaa"[tw] OR Jarvamaa[tw] OR Jarva[tw] OR Jogeveamaa[tw] OR Jogeva[tw] OR Laanemaa[tw] OR Laane[tw] OR "Laane Virumaa"[tw] OR Parnu[tw] OR Parnumaa[tw] OR Polva[tw] OR Polvamaa[tw] OR Rapla[tw] OR Raplamaa[tw] OR Saare[tw] OR Saaremaa[tw] OR Tartu[tw] OR Tartumaa[tw] OR Valga[tw] OR Valgamaa[tw] OR Viljandimaa[tw] OR Viljandi[tw] OR Voru[tw] OR Vorumaa[tw] OR Tallinn[tw] OR Narva[tw] OR "Kohtla Jarve"[tw] OR Rakvere[tw] OR Maardu[tw] OR Sillamae[tw] OR Kuressaare[tw]) OR ("Finland"[Mesh] OR Finland[tw] OR Finnish\*[tw] OR Finn[tw] OR Finns[tw] OR Suomi[tw] AND Suomen[tw] OR Suomalaiset[tw] OR Aland[tw] OR Ahvenanmaa[tw] OR Uusimaa[tw] OR Nyland[tw] OR Karelia[tw] OR Karjala[tw] OR Karelen[tw] OR Ostrobothnia[tw] OR Pohjanmaa[tw] OR Osterbotten[tw] OR Savonia[tw] OR Savo[tw] OR Savolax[tw] OR Kainuu[tw] OR Kajanaland\*[tw] OR "Kanta Hame"[tw] OR Tavastia[tw] OR Tavastland[tw] OR Kymenlaakso[tw] OR Kymmenedalen[tw] OR Lapland[tw] OR Lappi[tw] OR Lappland[tw] OR "Paijat Hame"[tw] OR Pirkanmaa[tw] OR Birkaland[tw] OR Satakunta[tw] OR Satakunda[tw] OR Helsinki[tw] OR Helsingfors[tw] OR Espoo[tw] OR Esbo[tw] OR Tampere[tw] OR Tammerfors[tw] OR Vantaa[tw] OR Vanda[tw] OR Oulu[tw] OR Uleaborg[tw] OR Turku[tw] OR Abo[tw] OR Jyvaskyla[tw] OR Kuopio[tw] OR Lahti[tw] OR Lahtis[tw] OR Kouvola[tw]) OR ("France"[Mesh] OR France[tw] OR

French\*[tw] OR Francais\*[tw] OR Alsace[tw] OR Elsass[tw] OR Aquitaine[tw] OR Aquitania[tw] OR Akitania[tw] OR Aguiene[tw] OR Auvergne[tw] OR Auvernhe[tw] OR Auvernha[tw] OR Normandie[tw] OR Normandy[tw] OR Normaudie[tw] OR Bourgogne[tw] OR Burgundy[tw] OR Bregogne[tw] OR Borgogne[tw] OR Brittany[tw] OR Breizh[tw] OR Bertaeyn[tw] OR Bretagne[tw] OR "Champagne Ardenne"[tw] OR Corse[tw] OR Corsica[tw] OR "Franche Comte"[tw] OR "Frantche Comte"[tw] OR "Franche Comtat"[tw] OR Guadeloupe[tw] OR Guyane[tw] OR Guiana[tw] OR "Languedoc Roussillon"[tw] OR "Lengadoc Rosselhon"[tw] OR "Llenguadoc-Rossello"[tw] OR Limousin[tw] OR Lemosin[tw] OR Lorraine[tw] OR Lothringen[tw] OR Lottringe[tw] OR Martinique[tw] OR "Midi Pyrenees"[tw] OR "Miegjorn Pireneus"[tw] OR "Mieidia Pireneus"[tw] OR "Mediodia Pirineos"[tw] OR "Pays de la Loire"[tw] OR "Broiou al Liger"[tw] OR Picardie[tw] OR Picardy[tw] OR "Poitou Charentes"[tw] OR "Peitau Charantas"[tw] OR "Poitou-Cherentes"[tw] OR Provence[tw] OR Provenca[tw] OR Prouvenco[tw] OR "Cote d Azur"[tw] OR "Cote d'Azur"[tw] OR "Costo d'Azur"[tw] OR "Costo d Azur"[tw] OR "Costa d'Azur"[tw] OR "Costa d Azur"[tw] OR Reunion[tw] OR "Rhone Alpes"[tw] OR "Rono Arpes"[tw] OR "Rose Aups"[tw] OR Ain[tw] OR Aisne[tw] OR Allier[tw] OR "Alpes de Haute Provence"[tw] OR "Haute Alpes"[tw] OR "Alpes Maritimes"[tw] OR Ardeche[tw] OR Ardennes[tw] OR Ariege[tw] OR Aube[tw] OR Aude[tw] OR Aveyron[tw] OR "Bas Rhin"[tw] OR "Bouches du Rhone"[tw] OR Calvados[tw] OR Cantal[tw] OR Charente[tw] OR Cher[tw] OR Correze[tw] OR "Corse du Sud"[tw] OR "Cote d Or"[tw] OR "Cote d'Or"[tw] OR "Cotes d Armor"[tw] OR "Cotes d'Armor"[tw] OR Creuse[tw] OR "Deux Sevres"[tw] OR Dordogne[tw] OR Doubs[tw] OR Drome[tw] OR Essonne[tw] OR Eure[tw] OR Finistere[tw] OR Gard[tw] OR Gers[tw] OR Gironde[tw] OR "Haute Corse"[tw] OR "Haute Garonne"[tw] OR "Haute Marne"[tw] OR "Hautes Alpes"[tw] OR "Haute Saone"[tw] OR "Haute Savoie"[tw] OR "Hautes Pyrenees"[tw] OR "Haute Vienne"[tw] OR "Haut Rhin"[tw] OR "Hauts de Seine"[tw] OR Herault[tw] OR "Ile de France"[tw] OR "Ile et Vilaine"[tw] OR Indre[tw] OR Isere[tw] OR Jura[tw] OR Landes[tw] OR Loire[tw] OR Loiret[tw] OR (Lot[tw] AND (departement[tw] OR department[tw])) OR "Lot et Garonne"[tw] OR "Loir et Cher"[tw] OR Lozere[tw] OR Manche[tw] OR Marne[tw] OR Mayenne[tw] OR Mayotte[tw] OR "Meurthe et Moselle"[tw] OR Meuse[tw] OR Morbihan[tw] OR Moselle[tw] OR (Nord[tw] AND (departement[tw] OR department[tw])) OR Nièvre[tw] OR Oise[tw] OR Orne[tw] OR "Pas de calais"[tw] OR "Noord-Nauw van Kales"[tw] OR Paris[tw] OR "Puy de dome"[tw] OR "Pyrenees Atlantiques"[tw] OR "Pyrenees Orientales"[tw] OR Rhone[tw] OR Sarthe[tw] OR Savoie[tw] OR "Seine et Marne"[tw] OR "Seine Maritime"[tw] OR Somme[tw] OR Tarn[tw] OR "Territoire de Belfort"[tw] OR "Val de Marne"[tw] OR "Val d Oise"[tw] OR Var[tw] OR Vaucluse[tw] OR Vendee[tw] OR Vienne[tw] OR Vosges[tw] OR Yonne[tw] OR Yvelines[tw] OR Marseille[tw] OR Lyon[tw] OR Nice[tw] OR Nantes[tw] OR Strasbourg[tw] OR Montpellier[tw] OR Bordeaux[tw] OR Lille[tw] OR Toulouse[tw] OR "Outre Mer"[tw] OR "Seine Saint Denis"[tw]) OR ("Germany"[Mesh] OR German\*[tw] OR Deutsch\*[tw] OR Bundesrepublik[tw] OR Westdeutschland[tw] OR Ostdeutschland[tw] OR Baden[tw] OR Wuerttemberg[tw] OR Wurttemberg[tw] OR Bayern[tw] OR Bavaria[tw] OR Berlin[tw] OR Brandenburg[tw] OR Bremen[tw] OR Oldenburg[tw] OR Mitteldeutschland[tw] OR Rhein[tw] OR Rhine[tw] OR Hannover[tw] OR Braunschweig[tw] OR Gottingen[tw] OR Goettingen[tw] OR Nurnberg[tw] OR Nuernberg[tw] OR Ruhr[tw] OR Kohn[tw] OR koeln[tw] OR Bonn[tw] OR Hamburg[tw] OR Hessen[tw] OR Hesse[tw] OR Hessia[tw] OR Mecklenburg[tw] OR Vorpommern[tw] OR Pomerania[tw] OR Niedersachsen[tw] OR Neddersassen[tw] OR Saxony[tw] OR Niederbayern[tw] OR "Northern Rhine"[tw] OR "North Rhine"[tw] OR Westphalia[tw] OR Westfalen[tw] OR "Rhineland Palatinate"[tw] OR "Rheinland Pfalz"[tw] OR Saarland[tw] OR Sachsen[tw] OR "Schleswig Holstein"[tw] OR Thuringia[tw] OR Thuringen[tw] OR Thueringen[tw] OR Munchen[tw] OR Muenchen[tw] OR Munich[tw] OR Frankfurt[tw] OR Stuttgart[tw] OR Dusseldorf[tw] OR Duesseldorf[tw] OR Dortmund[tw] OR Essen[tw]) OR ("Greece"[Mesh] OR Greece[tw] OR "Hellenic republic"[tw] OR Greek\*[tw] OR Ellada[tw] OR Elladas[tw] OR

"Elliniki Dimokratia"[tw] OR Hellas[tw] OR Hellenes[tw] OR Attica[tw] OR Attiki[tw] OR Makedonia\*[tw] OR Macedonia[tw] OR Thraki[tw] OR Thrace[tw] OR Crete[tw] OR Kriti[tw] OR "Ionia Nisia"[tw] OR "Ionion neson"[tw] OR "Ionion nIson"[tw] OR "Ionian islands"[tw] OR "Ionian island"[tw] OR Epirus[tw] OR Ipeiros[tw] OR "Perifereia Ipeirou"[tw] OR "North aegean"[tw] OR "Northern Aegean"[tw] OR "Aegean islands"[tw] OR "Aegean island"[tw] OR "NisoI Agaiou"[tw] OR "Notio Aigaio"[tw] OR Peloponnese[tw] OR Peloponniso\*[tw] OR Thessaly[tw] OR Thessalia[tw] OR Thessalian[tw] OR Petthalia[tw] OR "Voreio Aigaio"[tw] OR "Voreio Agaiou"[tw] OR "South aegean"[tw] OR "Southern Aegean"[tw] OR "Mount athos"[tw] OR "Oros Athos"[tw] OR Cyclades[tw] OR Cycklades[tw] OR Kiklades[tw] OR Dodecanese[tw] OR Dodekanisa[tw] OR Athens[tw] OR Athina[tw] OR Thessaloniki[tw] OR Thessalonica[tw] OR Patras[tw] OR Patra[tw] OR Pireas[tw] OR Piraeus[tw] OR Larissa[tw] OR Larisa[tw] OR Heraklion[tw] OR Heraclion[tw] OR Iraklion[tw] OR Irakleion[tw] OR Iraklio[tw] OR Volos[tw] OR Rhodes[tw] OR Rodos[tw] OR Ioannina[tw] OR Janina[tw] OR Yannena[tw] OR Chania[tw] OR Chalcis[tw] OR Chalkida[tw]) OR ("Hungary"[Mesh] OR Hungar\*[tw] OR Magyarország[tw] OR Magyar\*[tw] OR Dunantuli[tw] OR Transdanubia[tw] OR Dunantul[tw] OR "Great Plain"[tw] OR "Eszak Alföld"[tw] OR "Del Alföld"[tw] OR "Alföld es eszak"[tw] OR "Northern Alföld"[tw] OR "North Alföld"[tw] OR "South Alföld"[tw] OR "Southern Alföld"[tw] OR Bacs[tw] OR Kiskun[tw] OR Baranya[tw] OR Bekes[tw] OR Borsod[tw] OR Abauj[tw] OR Zemplen[tw] OR Budapest[tw] OR Csongrad[tw] OR Fejer[tw] OR gyor[tw] OR moson[tw] OR sopron[tw] OR hajdu[tw] OR bihar[tw] OR Heves[tw] OR "jasz nagykun szolnok"[tw] OR komarom[tw] OR esztergom[tw] OR Nograd[tw] OR (Pest[tw] AND (megye[tw] OR county[tw]))) OR Somogy[tw] OR szabolcs[tw] OR szatmar[tw] OR bereg[tw] OR Tolna[tw] OR Vas[tw] OR Veszprem[tw] OR Zala[tw] OR Debrecen[tw] OR Miskolc[tw] OR Szeged[tw] OR Pecs[tw] OR Gyor[tw] OR Nyiregyhaza[tw] OR Kecskemet[tw] OR Szekesfehervar[tw] OR Szombathely[tw]) OR ("Ireland"[Mesh] OR Ireland[tw] OR Eire[tw] OR Irish\*[tw] OR Fingal[tw] OR "Fine Gall"[tw] OR Dublin[tw] OR "Ath Cliath"[tw] OR "Dun Laoghaire"[tw] OR Wicklow[tw] OR "Cill Mhantain"[tw] OR "Chill Mhantain"[tw] OR Wexford[tw] OR "Loch Garman"[tw] OR Carlow[tw] OR Ceatharlach[tw] OR Kildare[tw] OR "Cill Dara"[tw] OR "Chill Dara"[tw] OR Meath[tw] OR "An Mhi"[tw] OR "Contae na Mi"[tw] OR Louth[tw] OR "Contae Lu"[tw] OR Monaghan[tw] OR Muineachan[tw] OR Mhuineachain[tw] OR Cavan[tw] OR "An Cabhan"[tw] OR "An Cabhain"[tw] OR Longford[tw] OR "An Longfort"[tw] OR "an Longfoirt"[tw] OR Langfurd[tw] OR Westmeath[tw] OR "An Iarmhi"[tw] OR "na Iarmhi"[tw] OR Offaly[tw] OR "Uibh Fhaili"[tw] OR Laois[tw] OR Laoise[tw] OR Kilkenny[tw] OR "Chill Chainnigh"[tw] OR "Cill Chainnigh"[tw] OR Waterford[tw] OR "Port Lairge"[tw] OR Watterford[tw] OR Cork[tw] OR Corcaigh[tw] OR Chorcai[tw] OR Kerry[tw] OR Ciarrai[tw] OR Chiarrai[tw] OR Limerick[tw] OR Luimneach[tw] OR Luimnigh[tw] OR Tipperary[tw] OR "Tiobraid Arann"[tw] OR "Thiobraid Arann"[tw] OR Clare[tw] OR "An Clar"[tw] OR "an Chlair"[tw] OR Galway[tw] OR Gaillimh[tw] OR "na Gaillimhe"[tw] OR Mayo[tw] OR "Maigh Eo"[tw] OR "Mhaigh Eo"[tw] OR Roscommon[tw] OR "Ros comain"[tw] OR Sligo[tw] OR Sligeach[tw] OR Shligigh[tw] OR Leitrim[tw] OR Liatroim[tw] OR Liatroma[tw] OR Donegal[tw] OR "Dhun na nGall"[tw] OR Dinnygal[tw] OR Dunnya[tw] OR Leinster[tw] OR Laignin[tw] OR "Cuige Laighean"[tw] OR Munster[tw] OR Mumhain[tw] OR "Cuige Mumhan"[tw] OR Connacht[tw] OR Connachta[tw] OR Drogheda[tw] OR "Droichead Atha"[tw] OR Dundalk[tw] OR "Dun Dealgan"[tw] OR Swords[tw] OR Sord[tw] OR Bray[tw] OR Bre[tw] OR Navan[tw] OR "An Uaimh"[tw] OR ("Italy"[Mesh] OR Italy[tw] OR Italia\*[tw] OR Abruzzo[tw] OR Abruzzi[tw] OR Basilicata[tw] OR Lucania[tw] OR Calabria[tw] OR Campania[tw] OR "Emilia Romagna"[tw] OR "friuli venezia giulia"[tw] OR Lazio[tw] OR Latium[tw] OR Liguria\*[tw] OR Lombardy[tw] OR Lombardia[tw] OR Marche[tw] OR Marches[tw] OR Molisano[tw] OR Molise[tw] OR Piedmont\*[tw] OR Piemonte[tw] OR Bolzano[tw] OR Bozen[tw] OR Trentino[tw] OR Trento[tw] OR Puglia[tw] OR Apulia[tw] OR Sardinia[tw] OR Sardegna[tw] OR Sicily[tw] OR Sicilia[tw] OR Toscana[tw] OR Tuscany[tw] OR Umbria[tw] OR "Valle d Aosta"[tw] OR "Vallee d Aoste"[tw] OR "Valle

d'Aosta[[tw](#)] OR "Vallee d'Aoste"[[tw](#)] OR "Aosta Valley"[[tw](#)] OR Veneto[[tw](#)] OR Venetia[[tw](#)] OR Triveneto[[tw](#)] OR Rome[[tw](#)] OR Roma[[tw](#)] OR Milan[[tw](#)] OR Milano[[tw](#)] OR Naples[[tw](#)] OR Napoli[[tw](#)] OR Turin[[tw](#)] OR Torino[[tw](#)] OR Palermo[[tw](#)] OR Genoa[[tw](#)] OR Genova[[tw](#)] OR Bologna[[tw](#)] OR Florence[[tw](#)] OR Firenze[[tw](#)] OR Bari[[tw](#)] OR Catania[[tw](#)]) OR ("Latvia"[[Mesh](#)] OR Latvi\*[[tw](#)] OR Riga[[tw](#)] OR Courland[[tw](#)] OR Kurzeme[[tw](#)] OR Kurland[[tw](#)] OR Latgale[[tw](#)] OR Lettgallia[[tw](#)] OR Latgola[[tw](#)] OR Latgalia[[tw](#)] OR Vidzeme[[tw](#)] OR Vidumo[[tw](#)] OR Semigallia[[tw](#)] OR Semigalia[[tw](#)] OR Zemgale[[tw](#)] OR Pieriga[[tw](#)] OR Daugavpils[[tw](#)] OR Dinaburg[[tw](#)] OR Jekabpils[[tw](#)] OR Jakobstadt[[tw](#)] OR Jelgava[[tw](#)] OR Jurmala[[tw](#)] OR Liepaja[[tw](#)] OR Libau[[tw](#)] OR Rezekne[[tw](#)] OR Rezne[[tw](#)] OR Rositten[[tw](#)] OR Valmiera[[tw](#)] OR Wolmar[[tw](#)] OR Ventspils[[tw](#)] OR Windau[[tw](#)] OR Ogre[[tw](#)]) OR ("Lithuania"[[Mesh](#)] OR Lithuania\*[[tw](#)] OR "Lietuvos Respublika"[[tw](#)] OR Lietuva[[tw](#)] OR lietuviu[[tw](#)] OR Alytus[[tw](#)] OR Alytaus[[tw](#)] OR Kaunas[[tw](#)] OR Kauno[[tw](#)] OR Klaipeda[[tw](#)] OR Klaipedos[[tw](#)] OR Marijampoles[[tw](#)] OR Marijampole[[tw](#)] OR Panevezys[[tw](#)] OR Panevezio[[tw](#)] OR Siauliai[[tw](#)] OR Siauliu[[tw](#)] OR Taurages[[tw](#)] OR Taurage[[tw](#)] OR Telsiu[[tw](#)] OR Telsiai[[tw](#)] OR Utenos[[tw](#)] OR Utena[[tw](#)] OR Vilnius[[tw](#)] OR Vilniaus[[tw](#)] OR Mazeikiai[[tw](#)] OR Jonava[[tw](#)] OR Mazeikiu[[tw](#)] OR Jonavos[[tw](#)]) OR ("Luxembourg"[[Mesh](#)] OR Luxembourg\*[[tw](#)] OR Luxemburg[[tw](#)] OR Letzebuerg[[tw](#)] OR Diekirch[[tw](#)] OR Grevenmacher[[tw](#)] OR "Esch sur Alzette"[[tw](#)] OR "Esch Uelzecht"[[tw](#)] OR "Esch an der Alzette"[[tw](#)] OR "Esch an der Alzig"[[tw](#)] OR Dudelange[[tw](#)] OR Diddeleng[[tw](#)] OR Dudelingen[[tw](#)] OR Duedelingen[[tw](#)] OR Schifflange[[tw](#)] OR Scheffleng[[tw](#)] OR Schifflingen[[tw](#)] OR Bettembourg[[tw](#)] OR Beetebuerg[[tw](#)] OR Bettemburg[[tw](#)] OR Petange[[tw](#)] OR Peiteng[[tw](#)] OR Petingen[[tw](#)] OR Ettelbruck[[tw](#)] OR Ettelbreck[[tw](#)] OR Ettelbrueck[[tw](#)] OR Diekirch[[tw](#)] OR Dikrech[[tw](#)] OR Strassen[[tw](#)] OR Stroossen[[tw](#)] OR Bertrange[[tw](#)] OR Bartreng[[tw](#)] OR Bartringen[[tw](#)]) OR ("Malta"[[Mesh](#)] OR Malta[[tw](#)] OR Maltese\*[[tw](#)] OR Maltin[[tw](#)] OR Gozo[[tw](#)] OR Ghawdex[[tw](#)] OR Valetta[[tw](#)] OR "Ill Belt"[[tw](#)] OR Birkirkara[[tw](#)] OR "B Kara"[[tw](#)] OR "B'Kara"[[tw](#)] OR Birchircara[[tw](#)] OR Mosta[[tw](#)] OR Qormi[[tw](#)] OR "St Paul s Bay"[[tw](#)] OR "St Paul's Bay"[[tw](#)] OR "Pawl il Bahar"[[tw](#)] OR Zabbar[[tw](#)] OR Sliema[[tw](#)] OR Naxxar[[tw](#)] OR Gwann[[tw](#)] OR "St John"[[tw](#)] OR Zebbug[[tw](#)] OR "Citta rohan"[[tw](#)] OR Fgura[[tw](#)]) OR ("Netherlands"[[Mesh](#)] OR Netherlands[[tw](#)] OR Nederland\*[[tw](#)] OR Dutch\*[[tw](#)] OR Drenthe[[tw](#)] OR Flevoland[[tw](#)] OR Friesland[[tw](#)] OR Fryslan[[tw](#)] OR Frisia[[tw](#)] OR Gelderland[[tw](#)] OR Guelders[[tw](#)] OR Groningen[[tw](#)] OR Limburg[[tw](#)] OR Brabant[[tw](#)] OR Holland[[tw](#)] OR Overijssel[[tw](#)] OR Overissel[[tw](#)] OR Utrecht[[tw](#)] OR Zeeland[[tw](#)] OR Amsterdam[[tw](#)] OR Rotterdam[[tw](#)] OR Hague[[tw](#)] OR "s-Gravenhage"[[tw](#)] OR "Den Haag"[[tw](#)] OR Eindhoven[[tw](#)] OR Tilburg[[tw](#)] OR Almere[[tw](#)] OR Breda[[tw](#)] OR Nijmegen[[tw](#)] OR Nimeguen[[tw](#)]) OR ("Poland"[[Mesh](#)] OR Poland[[tw](#)] OR Polska[[tw](#)] OR Polish[[tw](#)] OR Pole[[tw](#)] OR Poles[[tw](#)] OR Polski[[tw](#)] OR Polak[[tw](#)] OR Polka[[tw](#)] OR Polacy[[tw](#)] OR Dolnoslaskie[[tw](#)] OR Silesia\*[[tw](#)] OR Slask[[tw](#)] OR Pomorskie[[tw](#)] OR Pomerania\*[[tw](#)] OR Kujawsko[[tw](#)] OR Kuyavian[[tw](#)] OR Lodzkie[[tw](#)] OR Lodz[[tw](#)] OR Lubelskie[[tw](#)] OR Lublin[[tw](#)] OR Lubuskie[[tw](#)] OR Lubusz[[tw](#)] OR Lubus[[tw](#)] OR Malopolskie[[tw](#)] OR Mazowieckie[[tw](#)] OR Mazowske[[tw](#)] OR Masovia[[tw](#)] OR Masovian[[tw](#)] OR Opolskie[[tw](#)] OR Opole[[tw](#)] OR Podkarpackie[[tw](#)] OR Subcarpathian\*[[tw](#)] OR Podlaskie[[tw](#)] OR Podlachia[[tw](#)] OR Podlasie[[tw](#)] OR Slaskie[[tw](#)] OR Swietokrzyskie[[tw](#)] OR "Varmia Mazuria"[[tw](#)] OR "Varmian Mazurian"[[tw](#)] OR "Varmia Masuria"[[tw](#)] OR "Varmian Masurian"[[tw](#)] OR "Warmia Mazury"[[tw](#)] OR "Warminsko Mazurskie"[[tw](#)] OR "Warmian Masurian"[[tw](#)] OR Wielkopolskie[[tw](#)] OR Zachodniopomorskie[[tw](#)] OR Warsaw[[tw](#)] OR Warszawa[[tw](#)] OR Krakow[[tw](#)] OR Cracow[[tw](#)] OR Wroclaw[[tw](#)] OR Poznan[[tw](#)] OR Gdansk[[tw](#)] OR Szczecin[[tw](#)] OR Bydgoszcz[[tw](#)] OR Katowice[[tw](#)]) OR ("Portugal"[[Mesh](#)] OR Portugal[[tw](#)] OR Portugues\*[[tw](#)] OR Azores[[tw](#)] OR Acores[[tw](#)] OR Madeira[[tw](#)] OR Alentejo[[tw](#)] OR Algarve[[tw](#)] OR Lisboa[[tw](#)] OR Lisbon[[tw](#)] OR "Alto Tras-os-Montes"[[tw](#)] OR (Ave[[tw](#)] AND (community[[tw](#)] OR intermunicipal[[tw](#)] OR comunidade[[tw](#)])) OR Mondego[[tw](#)] OR Vouga[[tw](#)] OR Beira[[tw](#)] OR Cavado[[tw](#)] OR Lafoes[[tw](#)] OR Douro[[tw](#)] OR Porto[[tw](#)] OR Oporto[[tw](#)] OR Tejo[[tw](#)] OR Minho[[tw](#)] OR Setubal[[tw](#)] OR Pinhal[[tw](#)] OR "Serra da Estrela"[[tw](#)] OR Tamega[[tw](#)] OR Leira[[tw](#)] OR Santarem[[tw](#)] OR Beja[[tw](#)] OR Faro[[tw](#)] OR Evora[[tw](#)] OR Portalegre[[tw](#)] OR

"Castelo Branco"[tw] OR Guarda[tw] OR Cimbra[tw] OR Aveiro[tw] OR Viseu[tw] OR Braganca[tw] OR Braganza[tw] OR Braga[tw] OR "Vila real"[tw] OR "Viana do Castelo"[tw] OR Gaia[tw] OR Amadora[tw] OR Funchal[tw] OR Coimbra[tw] OR Almada[tw] OR (Aguilva[tw] AND Cacem[tw])) OR ("Romania"[Mesh] OR Romania\*[tw] OR Rumania\*[tw] OR Roumania\*[tw] OR Romani[tw] OR Rumani[tw] OR Alba[tw] OR Arad[tw] OR Arges[tw] OR Bacau[tw] OR Bihor[tw] OR "Bistrita Nasaud"[tw] OR Botosani[tw] OR Braila[tw] OR Brasov[tw] OR Kronstadt[tw] OR Brasso[tw] OR Brassovia[tw] OR Coron[tw] OR Bucharest[tw] OR Bucuresti[tw] OR Buzau[tw] OR Calarasi[tw] OR "Caras-Severin"[tw] OR Cluj[tw] OR Klausenburg[tw] OR Kolozsvar[tw] OR Constanta[tw] OR Tomis[tw] OR Konstantia[tw] OR Kostence[tw] OR Covasna[tw] OR Dambovita[tw] OR Dolj[tw] OR Galati[tw] OR Galatz[tw] OR Galac[tw] OR Kalas[tw] OR Giurgiu[tw] OR Gorj[tw] OR Harghita[tw] OR Hunedoara[tw] OR Ialomita[tw] OR Iasi[tw] OR Jassy[tw] OR Lassy[tw] OR Ilfov[tw] OR Maramures[tw] OR Mehedinti[tw] OR Mures[tw] OR Neamt[tw] OR (Olt[tw] AND (river[tw] OR county[tw] OR region[tw] OR judetul[tw] OR Raul[tw])) OR Prahova[tw] OR Salaj[tw] OR "Satu Mare"[tw] OR Sibiu[tw] OR Suceava[tw] OR Teleorman[tw] OR Timis[tw] OR Tulcea[tw] OR Valcea[tw] OR Vilcea[tw] OR Vaslui[tw] OR Vrancea[tw] OR Timisoara[tw] OR Temeswar[tw] OR Temeschburg[tw] OR Temeschwar[tw] OR Temesvar[tw] OR Temisvar[tw] OR Timisvar[tw] OR Temesva[tw] OR Craiova[tw] OR Ploiesti[tw] OR Ploesti[tw] OR Oradea[tw] OR Varad[tw] OR Varat[tw]) OR ("Slovakia"[Mesh] OR Slovakia[tw] OR Slovensk\*[tw] OR Slovak\*[tw] OR Slovaci[tw] OR Slovenki[tw] OR Bratislav\*[tw] OR Presporok[tw] OR Pressburg[tw] OR Pressburg[tw] OR Posonium[tw] OR Banskobystri\*[tw] OR "Banska Bystrica"[tw] OR Neusohl[tw] OR Besztercebanya[tw] OR Kotic\*[tw] OR Kaschau[tw] OR Kassa[tw] OR Nitrian\*[tw] OR Nitra[tw] OR Neutra[tw] OR Nyitra[tw] OR Nyitria[tw] OR Trnav\*[tw] OR Tyrnau[tw] OR Nagyszombat[tw] OR Tyrnavia[tw] OR Presov\*[tw] OR Trencian\*[tw] OR Trencin[tw] OR Trentschin[tw] OR Trencsen[tw] OR Zilina[tw] OR Sillein[tw] OR Zsolna[tw] OR Zylina[tw] OR (Martin[tw] AND (city[tw] OR Svaty[tw]))) OR Turocszentmarton[tw] OR Poprad[tw] OR Deutschendorf[tw] OR Zvolen[tw]) OR ("Slovenia"[Mesh] OR Slovenia\*[tw] OR Slovenija[tw] OR slovensk\*[tw] OR Slovinci[tw] OR Slovene\*[tw] OR Gorenjska[tw] OR Carniola[tw] OR Goriska[tw] OR Gorizia[tw] OR Jugovzhodna[tw] OR Koroska[tw] OR Carinthia[tw] OR "Notranjsko kraska"[tw] OR "Obalno kraska"[tw] OR "Coastal karst"[tw] OR Osrednjeslovenska[tw] OR Podravska[tw] OR Drava[tw] OR Pomurska[tw] OR Mura[tw] OR Savinjska[tw] OR Savinja[tw] OR Spodnjeposavska[tw] OR Zasavska[tw] OR "Central Sava"[tw] OR Posavska[tw] OR "Lower Sava"[tw] OR Ljubljana[tw] OR Laibach[tw] OR Lubiana[tw] OR Maribor[tw] OR "Marburg an der Drau"[tw] OR Kranj[tw] OR Carnium[tw] OR Creina[tw] OR Chreina[tw] OR Krainbur[tw] OR Koper[tw] OR Capodistria[tw] OR Kopar[tw] OR Celje[tw] OR "Novo mesto"[tw] OR Neustadt[tw] OR Domzale[tw] OR Velenje[tw] OR Wollan[tw] OR Woellan[tw] OR "Nova Gorica"[tw] OR Kamnik[tw]) OR ("Spain"[Mesh] OR Spain[tw] OR Espana[tw] OR Spanish[tw] OR Espanol\*[tw] OR Spaniard\*[tw] OR Andalucia[tw] OR Andalusia[tw] OR Aragon[tw] OR Arago[tw] OR Cantabria[tw] OR Canarias[tw] OR "Canary Islands"[tw] OR (Canaries[tw] AND island\*[tw]) OR "Castile and leon"[tw] OR "Castilla y Leon"[tw] OR "Castile La Mancha"[tw] OR "Castilla La Mancha"[tw] OR Cataluna[tw] OR Catalonia[tw] OR Ceuta[tw] OR Madrid[tw] OR Melilla[tw] OR Navarra[tw] OR Navarre[tw] OR Valencia\*[tw] OR Extremadura[tw] OR Galicia[tw] OR Balears[tw] OR "Balearic Islands"[tw] OR "Balear Islands"[tw] OR Balears[tw] OR "La Rioja"[tw] OR "Pais Vasco"[tw] OR "Basque Country"[tw] OR "Baske region"[tw] OR Euskadi[tw] OR Asturias[tw] OR Murcia[tw] OR Coruna[tw] OR Alava[tw] OR Araba[tw] OR Albacete[tw] OR Alicante[tw] OR Alacant[tw] OR Almeria[tw] OR Avila[tw] OR Badajoz[tw] OR Badajos[tw] OR Barcelona[tw] OR Burgos[tw] OR Caceres[tw] OR Cadiz[tw] OR Castellon[tw] OR Castello[tw] OR "Ciudad Real"[tw] OR Cordoba[tw] OR Cuenca[tw] OR Eivissa[tw] OR Ibiza[tw] OR Formentera[tw] OR "El Hierro"[tw] OR Fuerteventura[tw] OR Galiza[tw] OR Girona[tw] OR Gerona[tw] OR "Gran Canaria"[tw] OR Granada[tw] OR Guadalajara[tw] OR Guipuzcoa[tw] OR Gipuzkoa[tw] OR Huelva[tw] OR Huesca[tw] OR Jaen[tw] OR "La



Gomera[[tw](#)] OR "La Palma"[[tw](#)] OR Lanzarote[[tw](#)] OR Leon[[tw](#)] OR Lleida[[tw](#)] OR Lerida[[tw](#)] OR Lugo[[tw](#)] OR Malaga[[tw](#)] OR Mallorca[[tw](#)] OR Majorca[[tw](#)] OR Menorca[[tw](#)] OR Minorca[[tw](#)] OR Murcia[[tw](#)] OR Ourense[[tw](#)] OR Orense[[tw](#)] OR Palencia[[tw](#)] OR Pontevedra[[tw](#)] OR Salamanca[[tw](#)] OR Segovia[[tw](#)] OR Sevilla[[tw](#)] OR Seville[[tw](#)] OR Soria[[tw](#)] OR Tarragona[[tw](#)] OR Tenerife[[tw](#)] OR Teruel[[tw](#)] OR Toledo[[tw](#)] OR Valladolid[[tw](#)] OR Vizcaya[[tw](#)] OR Biscay[[tw](#)] OR Zamora[[tw](#)] OR Zaragoza[[tw](#)] OR Saragossa[[tw](#)] OR "Las Palmas"[[tw](#)] OR Bilbao[[tw](#)] OR Bilbo[[tw](#)] OR ("Sweden"[[Mesh](#)] OR Sweden[[tw](#)] OR Sverige[[tw](#)] OR Swedish[[tw](#)] OR Svenska[[tw](#)] OR svenskar[[tw](#)] OR Swede[[tw](#)] OR Swedes[[tw](#)] OR Norrland[[tw](#)] OR Mellansverige[[tw](#)] OR Smaland[[tw](#)] OR Stockholm\*[[tw](#)] OR Sydsverige[[tw](#)] OR Vastsverige[[tw](#)] OR Blekinge[[tw](#)] OR Dalarna[[tw](#)] OR Gavleborg\*[[tw](#)] OR Gotland\*[[tw](#)] OR Halland\*[[tw](#)] OR Jamtland\*[[tw](#)] OR Jonkoping\*[[tw](#)] OR Kalmar[[tw](#)] OR Kronoberg\*[[tw](#)] OR Norrbotten\*[[tw](#)] OR Orebro[[tw](#)] OR Ostergotland\*[[tw](#)] OR Skane[[tw](#)] OR Sodermanlands[[tw](#)] OR Uppsala[[tw](#)] OR Varmland\*[[tw](#)] OR Vasterbotten\*[[tw](#)] OR Vasternorrland\*[[tw](#)] OR Vastmanland\*[[tw](#)] OR vastergotland\*[[tw](#)] OR Gotaland\*[[tw](#)] OR Gothenburg[[tw](#)] OR Goteborg[[tw](#)] OR Malmo[[tw](#)] OR Vasteras[[tw](#)] OR Linkoping[[tw](#)] OR Helsingborg[[tw](#)] OR Halsingborg[[tw](#)] OR Norrkoping[[tw](#)]) OR ("Great Britain"[[Mesh](#)] OR GB[[tw](#)] OR "United kingdom"[[tw](#)] OR UK[[tw](#)] OR Britain[[tw](#)] OR British[[tw](#)] OR England[[tw](#)] OR English[[tw](#)] OR Scotland[[tw](#)] OR Scottish[[tw](#)] OR Scots[[tw](#)] OR Wales[[tw](#)] OR Cymru[[tw](#)] OR Welsh[[tw](#)] OR "North Ireland"[[tw](#)] OR "Northern Ireland"[[tw](#)] OR Irish[[tw](#)] OR Avon[[tw](#)] OR Bedfordshire[[tw](#)] OR Berkshire[[tw](#)] OR Bristol[[tw](#)] OR Buckinghamshire[[tw](#)] OR Cambridgeshire[[tw](#)] OR "Isle of Ely"[[tw](#)] OR Cheshire[[tw](#)] OR Cleveland[[tw](#)] OR Cornwall[[tw](#)] OR Cumberland[[tw](#)] OR Cumbria[[tw](#)] OR Derbyshire[[tw](#)] OR Devon[[tw](#)] OR Dorset[[tw](#)] OR Durham[[tw](#)] OR Essex[[tw](#)] OR Gloucestershire[[tw](#)] OR Hampshire[[tw](#)] OR Southampton[[tw](#)] OR (Hereford[[tw](#)] AND Worcester[[tw](#)]) OR Hertfordshire[[tw](#)] OR Herefordshire[[tw](#)] OR Humberside[[tw](#)] OR Huntingdon[[tw](#)] OR Huntingdonshire[[tw](#)] OR "Isle of Wight"[[tw](#)] OR Kent[[tw](#)] OR Lancashire[[tw](#)] OR Leicestershire[[tw](#)] OR Lincolnshire[[tw](#)] OR London[[tw](#)] OR Manchester[[tw](#)] OR Merseyside[[tw](#)] OR Middlesex[[tw](#)] OR Norfolk[[tw](#)] OR Northamptonshire[[tw](#)] OR Northumberland[[tw](#)] OR Nottinghamshire[[tw](#)] OR Oxfordshire[[tw](#)] OR Peterborough[[tw](#)] OR Rutland[[tw](#)] OR Shropshire[[tw](#)] OR Salop[[tw](#)] OR Somerset[[tw](#)] OR Yorkshire[[tw](#)] OR Staffordshire[[tw](#)] OR Suffolk[[tw](#)] OR Surrey[[tw](#)] OR Sussex[[tw](#)] OR (Tyne[[tw](#)] AND Wear[[tw](#)]) OR Warwickshire[[tw](#)] OR Midlands[[tw](#)] OR Westmorland[[tw](#)] OR Wiltshire[[tw](#)] OR Worcestershire[[tw](#)] OR "Isle of Man"[[tw](#)] OR Jersey[[tw](#)] OR Guernsey[[tw](#)] OR "Channel Islands"[[tw](#)] OR Aberdeen[[tw](#)] OR Aberdeenshire[[tw](#)] OR Angus[[tw](#)] OR Forfarshire[[tw](#)] OR Argyll[[tw](#)] OR Ayrshire[[tw](#)] OR Banffshire[[tw](#)] OR Berwickshire[[tw](#)] OR Bute[[tw](#)] OR Caithness[[tw](#)] OR Clackmannanshire[[tw](#)] OR Cromartyshire[[tw](#)] OR Dumfriesshire[[tw](#)] OR Dunbartonshire[[tw](#)] OR Dumbarton[[tw](#)] OR Dundee[[tw](#)] OR Lothian[[tw](#)] OR Haddingtonshire[[tw](#)] OR Edinburgh[[tw](#)] OR Fife[[tw](#)] OR Glasgow[[tw](#)] OR Inverness-shire[[tw](#)] OR Kincardineshire[[tw](#)] OR Kinross-shire[[tw](#)] OR Kirkcudbrightshire[[tw](#)] OR Lanarkshire[[tw](#)] OR Midlothian[[tw](#)] OR Moray[[tw](#)] OR Elginshire[[tw](#)] OR Nairnshire[[tw](#)] OR Orkney[[tw](#)] OR Peeblesshire[[tw](#)] OR Perthshire[[tw](#)] OR Renfrewshire[[tw](#)] OR (Ross[[tw](#)] AND Cromarty[[tw](#)]) OR Ross-shire[[tw](#)] OR Roxburghshire[[tw](#)] OR Selkirkshire[[tw](#)] OR Shetland[[tw](#)] OR Zetland[[tw](#)] OR Stirlingshire[[tw](#)] OR Sutherland[[tw](#)] OR Linlithgowshire[[tw](#)] OR Wigtownshire[[tw](#)] OR Anglesey[[tw](#)] OR Brecknockshire[[tw](#)] OR Caernarfonshire[[tw](#)] OR Carmarthenshire[[tw](#)] OR Cardiganshire[[tw](#)] OR Ceredigion[[tw](#)] OR Clwyd[[tw](#)] OR Denbighshire[[tw](#)] OR Dyfed[[tw](#)] OR Flintshire[[tw](#)] OR Glamorgan[[tw](#)] OR Gwent[[tw](#)] OR Gwynedd[[tw](#)] OR Merionethshire[[tw](#)] OR Montgomeryshire[[tw](#)] OR Monmouthshire[[tw](#)] OR Pembrokeshire[[tw](#)] OR Powys[[tw](#)] OR Radnorshire[[tw](#)] OR Antrim[[tw](#)] OR Aontroim[[tw](#)] OR "Contae Aontroma"[[tw](#)] OR Antrim[[tw](#)] OR Antrim[[tw](#)] OR Entrim[[tw](#)] OR Armagh[[tw](#)] OR "Ard Mhacha"[[tw](#)] OR Airmagh[[tw](#)] OR Belfast[[tw](#)] OR (Down[[tw](#)] AND (district[[tw](#)] OR council[[tw](#)] OR County[[tw](#)])) OR "An Dun"[[tw](#)] OR "an Duin"[[tw](#)] OR Doon[[tw](#)] OR Doun[[tw](#)] OR Fermanagh[[tw](#)] OR "Fear Manach"[[tw](#)] OR "Fhear Manach"[[tw](#)] OR Fermanay[[tw](#)] OR Londonderry[[tw](#)] OR

|     |                                                                                                                                            |         |
|-----|--------------------------------------------------------------------------------------------------------------------------------------------|---------|
|     | Doire[tw] OR Dhoire[tw] OR Lunnonderrie[tw] OR Derry[tw] OR Birmingham[tw] OR Leeds[tw] OR Sheffield[tw] OR Bradford[tw] OR Liverpool[tw]) |         |
| #19 | Search (#14 OR #15 OR #16 OR #17 OR #18)                                                                                                   | 9687092 |
| #20 | Search (#5 AND #13 AND #19)                                                                                                                | 44324   |
| #21 | Search (letter[PT] OR news[PT] OR editorial[PT] OR congresses[PT])                                                                         | 1718845 |
| #22 | Search (#20 NOT #21)                                                                                                                       | 11913   |
| #23 | Search (#22 AND 2009:2019[DP])                                                                                                             | 5197    |

### Supplementary Table S1b. Search string and results – Embase

| Search | Terms                                                                 | Results |
|--------|-----------------------------------------------------------------------|---------|
| 1      | exp prevalence/                                                       | 678086  |
| 2      | exp seroepidemiology/                                                 | 3765    |
| 3      | exp disease surveillance/                                             | 25720   |
| 4      | "seroepidemiolog*".ab,ti.                                             | 4388    |
| 5      | "epidemiolog*".ab,ti.                                                 | 426775  |
| 6      | "surveillance*".ab,ti.                                                | 217248  |
| 7      | "serolog*".ab,ti.                                                     | 128698  |
| 8      | "serosurvey*".ab,ti.                                                  | 1477    |
| 9      | "seroprevalen*".ab,ti.                                                | 19710   |
| 10     | "seropositiv*".ab,ti.                                                 | 44457   |
| 11     | "prevalence*".ab,ti.                                                  | 803053  |
| 12     | (sero adj2 (survey* or epidemiolog* or prevalen* or positiv*)).ab,ti. | 3631    |
| 13     | 1 or 2 or 3 or 4 or 5 or 6 or 7 or 8 or 9 or 10 or 11 or 12           | 1595973 |
| 14     | exp Human immunodeficiency virus/                                     | 186485  |
| 15     | exp Human immunodeficiency virus infection/                           | 362799  |
| 16     | exp acute HIV infection/                                              | 397     |
| 17     | HIV.ab,ti.                                                            | 373322  |

|    |                                                                                                                                                                  |        |
|----|------------------------------------------------------------------------------------------------------------------------------------------------------------------|--------|
| 18 | (human adj3 (immune* or immuno*) adj3 virus*).ab,ti.                                                                                                             | 92689  |
| 19 | 14 or 15 or 16 or 17 or 18                                                                                                                                       | 519379 |
| 20 | 13 and 19                                                                                                                                                        | 97143  |
| 21 | exp Human immunodeficiency virus prevalence/                                                                                                                     | 9790   |
| 22 | ((prevalen* or seroprevalen* or 'sero prevalen*' or serodiagnos* or serolog* or diagnos* or screen*) adj10 hiv).ab,ti.                                           | 67791  |
| 23 | ((prevalen* or seroprevalen* or 'sero prevalen*' or serodiagnos* or serolog* or diagnos* or screen*) adj10 (human adj3 (immune* or immuno*) adj3 virus*)).ab,ti. | 7398   |
| 24 | 21 or 22 or 23                                                                                                                                                   | 73332  |
| 25 | 20 or 24                                                                                                                                                         | 124319 |
| 26 | exp migrant/                                                                                                                                                     | 33086  |
| 27 | exp migration/                                                                                                                                                   | 40913  |
| 28 | exp minority group/                                                                                                                                              | 13561  |
| 29 | exp ethnic group/                                                                                                                                                | 126525 |
| 30 | exp ethnicity/                                                                                                                                                   | 68822  |
| 31 | "emigrant*".ab,ti.                                                                                                                                               | 1587   |
| 32 | (born adj abroad).ab,ti.                                                                                                                                         | 299    |
| 33 | (born adj outside).ab,ti.                                                                                                                                        | 1331   |
| 34 | "immigrant*".ab,ti.                                                                                                                                              | 25742  |
| 35 | "migrant*".ab,ti.                                                                                                                                                | 16586  |
| 36 | "refugee*".ab,ti.                                                                                                                                                | 10155  |
| 37 | "alien*".ab,ti.                                                                                                                                                  | 7378   |
| 38 | "migrat*".ab,ti.                                                                                                                                                 | 351156 |
| 39 | "emigrat*".ab,ti.                                                                                                                                                | 6515   |
| 40 | "immigrat*".ab,ti.                                                                                                                                               | 12902  |
| 41 | "minorit*".ab,ti.                                                                                                                                                | 82176  |
| 42 | "asylum*".ab,ti.                                                                                                                                                 | 3666   |
| 43 | "displaced*".ab,ti.                                                                                                                                              | 34986  |
| 44 | "foreign*".ab,ti.                                                                                                                                                | 80501  |
| 45 | "origin*".ab,ti.                                                                                                                                                 | 864611 |
| 46 | nationality.ab,ti.                                                                                                                                               | 5780   |

|    |                                                                                                                                                    |         |
|----|----------------------------------------------------------------------------------------------------------------------------------------------------|---------|
| 47 | minority.ab,ti.                                                                                                                                    | 72890   |
| 48 | minorities.ab,ti.                                                                                                                                  | 13393   |
| 49 | "resettlement*".ab,ti.                                                                                                                             | 1213    |
| 50 | (foreign* adj2 born*).ab,ti.                                                                                                                       | 3723    |
| 51 | 26 or 27 or 28 or 29 or 30 or 31 or 32 or 33 or 34 or 35 or 36 or 37 or 38 or 39 or 40 or 41 or 42 or 43 or 44 or 45 or 46 or 47 or 48 or 49 or 50 | 1611188 |
| 52 | exp prisoner/                                                                                                                                      | 14888   |
| 53 | exp prison/                                                                                                                                        | 13646   |
| 54 | exp detention camp/                                                                                                                                | 220     |
| 55 | "incarcerat*".ab,ti.                                                                                                                               | 12339   |
| 56 | "inmate*".ab,ti.                                                                                                                                   | 5347    |
| 57 | "prisoner*".ab,ti.                                                                                                                                 | 8083    |
| 58 | confinement.ab,ti.                                                                                                                                 | 11181   |
| 59 | "gaol*".ab,ti.                                                                                                                                     | 138     |
| 60 | "jail*".ab,ti.                                                                                                                                     | 3770    |
| 61 | "penitentiary*".ab,ti.                                                                                                                             | 654     |
| 62 | "prison*".ab,ti.                                                                                                                                   | 16708   |
| 63 | "reformatory*".ab,ti.                                                                                                                              | 89      |
| 64 | custodial.ab,ti.                                                                                                                                   | 1073    |
| 65 | custody.ab,ti.                                                                                                                                     | 3009    |
| 66 | custodies.ab,ti.                                                                                                                                   | 14      |
| 67 | "remand*".ab,ti.                                                                                                                                   | 454     |
| 68 | "detention*".ab,ti.                                                                                                                                | 3752    |
| 69 | "detainee*".ab,ti.                                                                                                                                 | 1005    |
| 70 | "imprison*".ab,ti.                                                                                                                                 | 2678    |
| 71 | "cellmate*".ab,ti.                                                                                                                                 | 26      |
| 72 | "convict*".ab,ti.                                                                                                                                  | 7466    |
| 73 | offender.ab,ti.                                                                                                                                    | 4150    |
| 74 | offenders.ab,ti.                                                                                                                                   | 11366   |
| 75 | ((correctional* or penal or internment or closed) adj5 (facilit* or institution* or camp* or setting*)).ab,ti.                                     | 3428    |

|     |                                                                                                                                                      |        |
|-----|------------------------------------------------------------------------------------------------------------------------------------------------------|--------|
| 76  | 52 or 53 or 54 or 55 or 56 or 57 or 58 or 59 or 60 or 61 or 62 or 63 or 64 or 65 or 66 or 67 or 68 or 69 or 70 or 71 or 72 or 73 or 74 or 75         | 72154  |
| 77  | exp men who have sex with men/                                                                                                                       | 8764   |
| 78  | exp LGBT people/                                                                                                                                     | 8238   |
| 79  | exp bisexual male/                                                                                                                                   | 1090   |
| 80  | exp homosexual male/                                                                                                                                 | 1889   |
| 81  | exp male homosexuality/                                                                                                                              | 2733   |
| 82  | MSM.ab,ti.                                                                                                                                           | 13355  |
| 83  | MASM.ab,ti.                                                                                                                                          | 20     |
| 84  | MSMW.ab,ti.                                                                                                                                          | 123    |
| 85  | GBMSM.ab,ti.                                                                                                                                         | 69     |
| 86  | GB-MSM.ab,ti.                                                                                                                                        | 8      |
| 87  | "cruisin*".ab,ti.                                                                                                                                    | 521    |
| 88  | "queer*".ab,ti.                                                                                                                                      | 1055   |
| 89  | ((men or man or male or males) adj3 (who or has or have or having or had or report* or inform*) adj3 sex* adj3 (men or man or male or males)).ab,ti. | 18597  |
| 90  | ("male to male" adj3 sex* adj3 contact).ab,ti.                                                                                                       | 91     |
| 91  | ((gay* or homosexual* or bisexual* or 'non heterosexual*' or 'non binary' or lesbigay* or lbg) adj5 (men or man or male or males)).ab,ti.            | 12680  |
| 92  | 77 or 78 or 79 or 80 or 81 or 82 or 83 or 84 or 85 or 86 or 87 or 88 or 89 or 90 or 91                                                               | 41897  |
| 93  | exp transgender/                                                                                                                                     | 4771   |
| 94  | exp transsexualism/                                                                                                                                  | 3467   |
| 95  | exp transsexuality/                                                                                                                                  | 267    |
| 96  | exp LGBT people/                                                                                                                                     | 8238   |
| 97  | "transgender*".ab,ti.                                                                                                                                | 5977   |
| 98  | transpeople.ab,ti.                                                                                                                                   | 17     |
| 99  | "transperson*".ab,ti.                                                                                                                                | 257    |
| 100 | "tran*sex*".ab,ti.                                                                                                                                   | 2846   |
| 101 | "transm*n".ab,ti.                                                                                                                                    | 365065 |
| 102 | "transwom*n".ab,ti.                                                                                                                                  | 220    |
| 103 | "two spirit person*".ab,ti.                                                                                                                          | 3      |

|     |                                                                                                                                                 |        |
|-----|-------------------------------------------------------------------------------------------------------------------------------------------------|--------|
| 104 | "two spirit individual*".ab,ti.                                                                                                                 | 9      |
| 105 | two spirit people.ab,ti.                                                                                                                        | 5      |
| 106 | gibt.ab,ti.                                                                                                                                     | 68     |
| 107 | gibtq.ab,ti.                                                                                                                                    | 11     |
| 108 | gibtqq.ab,ti.                                                                                                                                   | 1      |
| 109 | lgbt.ab,ti.                                                                                                                                     | 1284   |
| 110 | lgbtq.ab,ti.                                                                                                                                    | 499    |
| 111 | lgbtqq.ab,ti.                                                                                                                                   | 1      |
| 112 | (trans adj2 (man or men or male or males or 'wom*n' or female* or gender* or person* or people or individual* or sex*)).ab,ti.                  | 973    |
| 113 | ((gender* or sex*) adj3 (variant* or reassign* or dissident*)).ab,ti.                                                                           | 1975   |
| 114 | (intersex adj3 (individual* or people or person*)).ab,ti.                                                                                       | 153    |
| 115 | 93 or 94 or 95 or 96 or 97 or 98 or 99 or 100 or 101 or 102 or 103 or 104 or 105 or 106 or 107 or 108 or 109 or 110 or 111 or 112 or 113 or 114 | 379995 |
| 116 | exp prostitution/                                                                                                                               | 8531   |
| 117 | exp sex worker/                                                                                                                                 | 1455   |
| 118 | exp transactional sex/                                                                                                                          | 397    |
| 119 | (sex* adj3 (transactional or work* or industr* or exchange or survival or paid)).ab,ti.                                                         | 13540  |
| 120 | "prostitut*".ab,ti.                                                                                                                             | 3014   |
| 121 | fsw.ab,ti.                                                                                                                                      | 1144   |
| 122 | msh.ab,ti.                                                                                                                                      | 3196   |
| 123 | csw.ab,ti.                                                                                                                                      | 497    |
| 124 | "whore*".ab,ti.                                                                                                                                 | 196    |
| 125 | "call girl*".ab,ti.                                                                                                                             | 9      |
| 126 | "streetwalker*".ab,ti.                                                                                                                          | 7      |
| 127 | "nightwalker*".ab,ti.                                                                                                                           | 0      |
| 128 | "lad* of the night*".ab,ti.                                                                                                                     | 10     |
| 129 | "walk the pavement*".ab,ti.                                                                                                                     | 1      |
| 130 | 116 or 117 or 118 or 119 or 120 or 121 or 122 or 123 or 124 or 125 or 126 or 127 or 128 or 129                                                  | 22647  |
| 131 | exp pregnancy/                                                                                                                                  | 570841 |
| 132 | exp pregnant woman/                                                                                                                             | 70071  |

|     |                                                                                             |         |
|-----|---------------------------------------------------------------------------------------------|---------|
| 133 | exp prenatal care/                                                                          | 136564  |
| 134 | exp prenatal screening/                                                                     | 8208    |
| 135 | "pregnant*".ab,ti.                                                                          | 210931  |
| 136 | "pregnanc*".ab,ti.                                                                          | 471775  |
| 137 | "gravid*".ab,ti.                                                                            | 15852   |
| 138 | "child bearing".ab,ti.                                                                      | 3838    |
| 139 | childbearing.ab,ti.                                                                         | 14824   |
| 140 | "antenatal*".ab,ti.                                                                         | 47384   |
| 141 | "ante natal* ".ab,ti.                                                                       | 711     |
| 142 | 131 or 132 or 133 or 134 or 135 or 136 or 137 or 138 or 139 or 140 or 141                   | 849205  |
| 143 | exp intravenous drug abuse/                                                                 | 10109   |
| 144 | exp injection drug user/                                                                    | 811     |
| 145 | PWID.ab,ti.                                                                                 | 1848    |
| 146 | IDU.ab,ti.                                                                                  | 3770    |
| 147 | IVDU.ab,ti.                                                                                 | 977     |
| 148 | ((inject* or intraven* or parenteral or use* or misuse*) adj3 (drug* or substance*)).ab,ti. | 279610  |
| 149 | 143 or 144 or 145 or 146 or 147 or 148                                                      | 283717  |
| 150 | 51 or 76 or 92 or 115 or 130 or 142 or 149                                                  | 3076974 |
| 151 | exp Europe/                                                                                 | 1420454 |
| 152 | exp European Union/                                                                         | 25692   |
| 153 | exp Eastern Europe/                                                                         | 189081  |
| 154 | exp Western Europe/                                                                         | 946306  |
| 155 | exp Southern Europe/                                                                        | 225212  |
| 156 | exp Northern European/                                                                      | 8245    |
| 157 | exp Eastern European/                                                                       | 5010    |
| 158 | exp Central European/                                                                       | 12782   |
| 159 | exp EU citizen/                                                                             | 30267   |
| 160 | exp European/                                                                               | 169737  |
| 161 | exp Western European/                                                                       | 14361   |
| 162 | exp Southern European/                                                                      | 10563   |

|     |                                                                                                                                                                                                                                                                                                                                                                                                                                                                                                                                                                                                                                                                                                                                                                                                              |        |
|-----|--------------------------------------------------------------------------------------------------------------------------------------------------------------------------------------------------------------------------------------------------------------------------------------------------------------------------------------------------------------------------------------------------------------------------------------------------------------------------------------------------------------------------------------------------------------------------------------------------------------------------------------------------------------------------------------------------------------------------------------------------------------------------------------------------------------|--------|
| 163 | exp Baltic States/                                                                                                                                                                                                                                                                                                                                                                                                                                                                                                                                                                                                                                                                                                                                                                                           | 8803   |
| 164 | exp Scandinavia/                                                                                                                                                                                                                                                                                                                                                                                                                                                                                                                                                                                                                                                                                                                                                                                             | 183335 |
| 165 | exp Czechoslovakia/                                                                                                                                                                                                                                                                                                                                                                                                                                                                                                                                                                                                                                                                                                                                                                                          | 23049  |
| 166 | exp "Yugoslavia (pre-1992)"/ or exp Yugoslavia/                                                                                                                                                                                                                                                                                                                                                                                                                                                                                                                                                                                                                                                                                                                                                              | 27366  |
| 167 | exp Balkan Peninsula/                                                                                                                                                                                                                                                                                                                                                                                                                                                                                                                                                                                                                                                                                                                                                                                        | 272    |
| 168 | exp Benelux/                                                                                                                                                                                                                                                                                                                                                                                                                                                                                                                                                                                                                                                                                                                                                                                                 | 65     |
| 169 | (Europe* or europa* or eu or eea or efta or "eu/eea" or "eu/efta" or ecsc or euratom or eurozone or eec or ec or (schengen and (area or countr* or region* or state or states)) or euroregion or euroregions).ab,in,ti.                                                                                                                                                                                                                                                                                                                                                                                                                                                                                                                                                                                      | 662339 |
| 170 | (balkan or balkans or baltic or (mediterranean and (area or countr* or region* or state or states)) or (alpine and (area or countr* or region* or state or states)) or scandinavia or scandinavian or (nordic and (countr* or state*)) or danubian or "iberian peninsula" or "peninsula iberica" or "peninsule iberique" or "iberiar penintsula" or iberia or anatolia or anadolu or anatole or anatolian or yugoslavia or czechoslovakia or "czecho slovakia" or ceskoslovensko or "cesko slovensko" or benelux or fennoscandia or "fenno Scandinavia" or fennoskandi* or (visegrad and (group or four or triangle)) or "visegradska ctyrka" or "visegradska skupina" or "visegradi egyuttmukodes" or "segradi negyek" or "grupa wyszehradzka" or "vysehradska skupina" or "vysehradska stvorka").ab,in,ti. | 102671 |
| 171 | exp Austria/                                                                                                                                                                                                                                                                                                                                                                                                                                                                                                                                                                                                                                                                                                                                                                                                 | 19357  |
| 172 | exp Austrian/                                                                                                                                                                                                                                                                                                                                                                                                                                                                                                                                                                                                                                                                                                                                                                                                | 949    |
| 173 | (austria* or osterreich* or oesterreich* or ostosterreich or ostoesterreich or sudosterreich or sudoesterreich or westosterreich or westoesterreich or burgenland or carinthia or karnten or kaernten or niederosterreich or niederoesterreich or oberosterreich or oberoesterreich or salzburg or saizburg or styria or steiermark or tyrol or tirol or vorarlberg or vienna or wien or graz or linz or innsbruck or klagenfurt or villach or wels or 'st polten' or 'st poelten' or 'sankt polten' or 'sankt poelten' or dornbirn).ab,in,ti.                                                                                                                                                                                                                                                               | 275622 |
| 174 | exp Belgium/                                                                                                                                                                                                                                                                                                                                                                                                                                                                                                                                                                                                                                                                                                                                                                                                 | 22499  |
| 175 | exp Belgian/                                                                                                                                                                                                                                                                                                                                                                                                                                                                                                                                                                                                                                                                                                                                                                                                 | 959    |
| 176 | (belgi* or belge* or belg or brussel* or bruxelles or bruxelloise or walloon* or wallon* or vlaams or flander* or flandern or flandre or flemish or flamand or flemisch or flamisch* or vlaanderen or flamande or waals or antwerp* or anvers or henegouwen or hennegau or hainault or hainaut or liege or luik or luttich or limburg or limburg or namur or namen or ostflandern or westflandern or ghent or gent or gand or charleroi or bruges or brugge* or schaarbeek or schaarbeek or anderlecht or leuven or louvain).ab,in,ti.                                                                                                                                                                                                                                                                       | 413077 |
| 177 | exp Bulgaria/                                                                                                                                                                                                                                                                                                                                                                                                                                                                                                                                                                                                                                                                                                                                                                                                | 6899   |
| 178 | exp "Bulgarian (people)"/ or exp "Bulgarian (citizen)"/                                                                                                                                                                                                                                                                                                                                                                                                                                                                                                                                                                                                                                                                                                                                                      | 323    |
| 179 | (bulgaria or balgariya or balgarija or blagoevgrad* or 'pirin macedonia' or burgas or dobrich or gabrovo or haskovo or kardzhali or kurdzhali or kyustendil or lovech or lovec or montana or pazardzhik or pernik or pleven* or plovdiv or razgrad or rousse or ruse or rusenka or shumen or silistra or sliven or smolyan or sofia or sofyiska or sofiiska or 'stara zagora' or targovishte or varna or 'veliko tarnovo' or vidin or vratsa or vratza or yambol).ab,in,ti.                                                                                                                                                                                                                                                                                                                                  | 77303  |
| 180 | exp Croatia/                                                                                                                                                                                                                                                                                                                                                                                                                                                                                                                                                                                                                                                                                                                                                                                                 | 9528   |



|     |                                                                                                                                                                                                                                                                                                                                                                                                                                                                                                                                                                                                                                                                                                                                                                                                                                                                                                                                             |        |
|-----|---------------------------------------------------------------------------------------------------------------------------------------------------------------------------------------------------------------------------------------------------------------------------------------------------------------------------------------------------------------------------------------------------------------------------------------------------------------------------------------------------------------------------------------------------------------------------------------------------------------------------------------------------------------------------------------------------------------------------------------------------------------------------------------------------------------------------------------------------------------------------------------------------------------------------------------------|--------|
| 181 | exp "Croatian (citizen)"/                                                                                                                                                                                                                                                                                                                                                                                                                                                                                                                                                                                                                                                                                                                                                                                                                                                                                                                   | 319    |
| 182 | "Croat (people)"/                                                                                                                                                                                                                                                                                                                                                                                                                                                                                                                                                                                                                                                                                                                                                                                                                                                                                                                           | 4      |
| 183 | (croat* or hrvatsk* or hrvati or bjelovar or 'bjelovarsko bilogorska' or 'brod posavina' or 'brodsko posavska' or 'dubrovnik neretva' or 'dubrovacko neretvanska' or zagreb or zagrebacka or istria or istarska or karlovačka or karlovac or 'koprivnicko krizevačka' or koprivnica or krizevci or 'krapina zagorje' or 'krapinsko zagorska' or 'lika senj' or 'licko senjska' or medimurska or medimurje or osijek or baranja or 'osječko baranjska' or 'požega slavonska' or 'požeško slavonska' or 'primorje gorski kotar' or 'primorsko goranska' or 'sibensko kninska' or 'sibensko kninske' or sibenik or knin or sisak or 'sisacko moslavacka' or moslavina or 'splitsko dalmatinska' or split or dalmatia or varazdin or varazdinska or viroviticko or podravska or virovitica or podravina or 'vukovarsko srijemska' or vukovar or srijem or zadar or zadarska or rijeka or 'velika gorica' or 'slavonski brod' or pula).ab,in,ti. | 125312 |
| 184 | exp Cyprus/                                                                                                                                                                                                                                                                                                                                                                                                                                                                                                                                                                                                                                                                                                                                                                                                                                                                                                                                 | 2058   |
| 185 | exp Cypriot/                                                                                                                                                                                                                                                                                                                                                                                                                                                                                                                                                                                                                                                                                                                                                                                                                                                                                                                                | 157    |
| 186 | (cyprus or cypriot* or kypros or kibris* or kypriaki or kyprioi or nicosia or lefkosa or lefkosia or famagusta or magusa or ammochoostos or gazimagusa or kyrenia or girne or keryneia or larnaca or larnaka or iskele or limassol or lemesos or limasol or leymosun or paphos or pafos or baf or strovolos or lakatamia or lakadamyia or 'kato polemidia' or 'kato polemidhia' or aglandjia or eglence or aglantzia or aradhippou or aradippou or engomi).ab,in,ti.                                                                                                                                                                                                                                                                                                                                                                                                                                                                        | 13775  |
| 187 | exp "Czech (people)"/ or exp "Czech (citizen)"/ or exp Czech Republic/                                                                                                                                                                                                                                                                                                                                                                                                                                                                                                                                                                                                                                                                                                                                                                                                                                                                      | 13418  |
| 188 | (czech* or cesky or ceska or cech or cestina or prague or praha or prag or stredoces* or jihoces* or bohemia or bohemian or plzen* or pilsen or karlovars* or 'karlovy vary' or usteck* or usti or liberec* or 'hradec kralove' or kralovehradec* or pardubic* or olomouc* or olomoc or holomoc or moravskoslezs* or jihomorav* or moravia or moravian or morava or vysocina or zlin or zlinsk* or 'ceske budejovice' or budweis or brno or ostrava).ab,in,ti.                                                                                                                                                                                                                                                                                                                                                                                                                                                                              | 175368 |
| 189 | exp Denmark/                                                                                                                                                                                                                                                                                                                                                                                                                                                                                                                                                                                                                                                                                                                                                                                                                                                                                                                                | 44083  |
| 190 | exp Danish citizen/                                                                                                                                                                                                                                                                                                                                                                                                                                                                                                                                                                                                                                                                                                                                                                                                                                                                                                                         | 1963   |
| 191 | exp "Dane (people)"/                                                                                                                                                                                                                                                                                                                                                                                                                                                                                                                                                                                                                                                                                                                                                                                                                                                                                                                        | 133    |
| 192 | (denmark or danish* or dane or danes or danmark or dansk* or hovedstaden or midtjylland or nordjylland or sjælland or sealand or 'zealand region' or 'region zealand' or syddanmark or jutland or jylland or sonderjyllands or copenhagen or kobenhavn or arhus or aarhus or bornholm or frederiksberg or frederiksborg or ringkjøbing or viborg or vejle or roskilde or storstrom or vestsjællands or 'west zealand' or funen or ribe or 'kalaallit nunaat' or gronland or foroyar or faeroerne or 'faroe islands' or aalborg or alborg or odense or esbjerg or gentofte or gladsaxe or randers or kolding).ab,in,ti.                                                                                                                                                                                                                                                                                                                      | 331258 |
| 193 | exp Estonia/                                                                                                                                                                                                                                                                                                                                                                                                                                                                                                                                                                                                                                                                                                                                                                                                                                                                                                                                | 3576   |
| 194 | exp "Estonian (people)"/ or exp "Estonian (citizen)"/                                                                                                                                                                                                                                                                                                                                                                                                                                                                                                                                                                                                                                                                                                                                                                                                                                                                                       | 157    |
| 195 | (estonia* or eesti or eestlased or eestlane or harju or harjumaa or hiiu or hiiumaa or 'ida viru' or 'ida virumaa' or jarvamaa or jarva or jogevamaa or jogeva or laanemaa or laane or 'laane virumaa' or parnu or parnumaa or polva or polvamaa or rapla or raplamaa or saare or saaremaa or tartu or tartumaa or valga or valgamaa or viljandimaa or viljandi or voru or vorumaa or tallinn or narva or 'kohtla jarve' or rakvere or maardu or sillamae or kuressaare).ab,in,ti.                                                                                                                                                                                                                                                                                                                                                                                                                                                          | 17908  |
| 196 | exp Finland/                                                                                                                                                                                                                                                                                                                                                                                                                                                                                                                                                                                                                                                                                                                                                                                                                                                                                                                                | 32673  |
| 197 | exp "Finn (people)"/ or exp "Finn (citizen)"/                                                                                                                                                                                                                                                                                                                                                                                                                                                                                                                                                                                                                                                                                                                                                                                                                                                                                               | 1165   |

|     |                                                                                                                                                                                                                                                                                                                                                                                                                                                                                                                                                                                                                                                                                                                                                                                                                                                                                                                                                                                                                                                                                                                                                                                                                                                                                                                                                                                                                                                                                                                                                                                                                                                                                                                                                                                                                                                                                                                                                                                                                                                                                                                                                                                                                                                                                                                                                                                                                                                                               |         |
|-----|-------------------------------------------------------------------------------------------------------------------------------------------------------------------------------------------------------------------------------------------------------------------------------------------------------------------------------------------------------------------------------------------------------------------------------------------------------------------------------------------------------------------------------------------------------------------------------------------------------------------------------------------------------------------------------------------------------------------------------------------------------------------------------------------------------------------------------------------------------------------------------------------------------------------------------------------------------------------------------------------------------------------------------------------------------------------------------------------------------------------------------------------------------------------------------------------------------------------------------------------------------------------------------------------------------------------------------------------------------------------------------------------------------------------------------------------------------------------------------------------------------------------------------------------------------------------------------------------------------------------------------------------------------------------------------------------------------------------------------------------------------------------------------------------------------------------------------------------------------------------------------------------------------------------------------------------------------------------------------------------------------------------------------------------------------------------------------------------------------------------------------------------------------------------------------------------------------------------------------------------------------------------------------------------------------------------------------------------------------------------------------------------------------------------------------------------------------------------------------|---------|
| 198 | (finland or finnish* or finn or finns or suomi or suomen or suomalaiset or aland or ahvenanmaa or uusimaa or nyland or karelia or karjala or karelen or ostrobothnia or pohjanmaa or osterbotten or savonia or savo or savolax or kainuu or kajanaland* or 'kanta hame' or tavastia or tavastland or kymenlaakso or kymmenedalen or lapland or lappi or lappland or 'paijat hame' or pirkanmaa or birkaland or satakunta or satakunda or helsinki or helsingfors or espoo or esbo or tampere or tammerfors or vantaa or vanda or oulu or uleaborg or turku or abo or jyvaskyla or kuopio or lahti or lahtis or kouvola).ab,in,ti.                                                                                                                                                                                                                                                                                                                                                                                                                                                                                                                                                                                                                                                                                                                                                                                                                                                                                                                                                                                                                                                                                                                                                                                                                                                                                                                                                                                                                                                                                                                                                                                                                                                                                                                                                                                                                                             | 234593  |
| 199 | exp France/                                                                                                                                                                                                                                                                                                                                                                                                                                                                                                                                                                                                                                                                                                                                                                                                                                                                                                                                                                                                                                                                                                                                                                                                                                                                                                                                                                                                                                                                                                                                                                                                                                                                                                                                                                                                                                                                                                                                                                                                                                                                                                                                                                                                                                                                                                                                                                                                                                                                   | 108014  |
| 200 | exp Frenchman/                                                                                                                                                                                                                                                                                                                                                                                                                                                                                                                                                                                                                                                                                                                                                                                                                                                                                                                                                                                                                                                                                                                                                                                                                                                                                                                                                                                                                                                                                                                                                                                                                                                                                                                                                                                                                                                                                                                                                                                                                                                                                                                                                                                                                                                                                                                                                                                                                                                                | 1694    |
| 201 | (france or french* or francais* or alsace or elsass or aquitaine or aquitania or akitania or aguiene or auvergne or auvernhe or auvernha or normandie or normandy or normaundie or bourgogne or burgundy or bregogne or borgoegne or borgogne or brittany or breizh or bertaeyn or bretagne or 'champagne ardenne' or corse or corsica or 'franche comte' or 'frantche comte' or 'franche comtat' or guadeloupe or guyane or guiana or 'languedoc roussillon' or 'lengadoc rosselhon' or 'llenguadoc-rossello' or limousin or lemosin or lorraine or lothringen or lottringe or martinique or 'midi pyrenees' or 'mieggjorn pireneus' or 'mieidia pireneus' or 'mediodia pirineos' or 'pays de la loire' or 'broiou al liger' or picardie or picardy or 'poitou charentes' or 'peitau charantas' or 'poitou-cherentes' or provence or provenca or prouvenco or 'cote d azur' or 'costo d azur' or 'costa d azur' or reunion or 'rhone alpes' or 'rono arpes' or 'rose aups' or ain or aisne or allier or 'alpes de haute provence' or 'haute alpes' or 'alpes maritimes' or ardeche or ardennes or ariege or aube or aude or aveyron or 'bas rhin' or 'bouches du rhone' or calvados or cantal or charente or cher or correze or 'corse du sud' or 'cote d or' or 'cotes d armor' or creuse or 'deux sevres' or dordogne or doubs or drome or essonne or eure or finistere or gard or gers or gironde or 'haute corse' or 'haute garonne' or 'haute marne' or 'hautes alpes' or 'haute saone' or 'haute savoie' or 'hautes pyrenees' or 'haute vienne' or 'haut rhin' or 'hauts de seine' or herault or 'ile de france' or 'ille et vilaine' or indre or isere or jura or landes or loire or loiret or (lot adj3 (departement or department)) or 'lot et garonne' or 'loir et cher' or lozere or manche or marne or mayenne or mayotte or 'meurthe et moselle' or meuse or morbihan or moselle or (nord adj3 (departement or departement)) or nievre or oise or orne or 'pas de calais' or 'noord-nauw van kales' or paris or 'puy de dome' or 'pyrenees atlantiques' or 'pyrenees orientales' or rhone or sarthe or savoie or 'seine et marne' or 'seine maritime' or somme or tarn or 'territoire de belfort' or 'val de marne' or 'val d oise' or var or vaucluse or vendee or vienne or vosges or yonne or yvelines or marseille or lyon or nice or nantes or strasbourg or montpellier or bordeaux or lille or toulouse or 'outré mer' or 'seine saint denis').ab,in,ti. | 1490327 |
| 202 | exp Germany/                                                                                                                                                                                                                                                                                                                                                                                                                                                                                                                                                                                                                                                                                                                                                                                                                                                                                                                                                                                                                                                                                                                                                                                                                                                                                                                                                                                                                                                                                                                                                                                                                                                                                                                                                                                                                                                                                                                                                                                                                                                                                                                                                                                                                                                                                                                                                                                                                                                                  | 160356  |
| 203 | exp "German (citizen)"/                                                                                                                                                                                                                                                                                                                                                                                                                                                                                                                                                                                                                                                                                                                                                                                                                                                                                                                                                                                                                                                                                                                                                                                                                                                                                                                                                                                                                                                                                                                                                                                                                                                                                                                                                                                                                                                                                                                                                                                                                                                                                                                                                                                                                                                                                                                                                                                                                                                       | 6237    |
| 204 | (german* or deutsch* or bundesrepublik or westdeutschland or ostdeutschland or baden or wuerttemberg or wurttemberg or bayern or bavaria or berlin or brandenburg or bremen or oldenburg or mitteldeutschland or rhein or rhine or hannover or braunschweig or gottingen or goettingen or nurnberg or nuernberg or ruhr or koln or koeln or bonn or hamburg or hessen or hesse or hessia or mecklenburg or vorpommern or pomerania or niedersachsen or neddersassen or saxony or niederbayern or 'northern rhine' or 'north rhine' or westphalia or westfalen or 'rhineland palatinate' or 'rheinland pfalz' or saarland or sachsen or 'schleswig holstein' or thuringia or thuringen or thueringen or munchen or muenchen or munich or frankfurt or stuttgart or dusseldorf or duesseldorf or dortmund or essen).ab,in,ti.                                                                                                                                                                                                                                                                                                                                                                                                                                                                                                                                                                                                                                                                                                                                                                                                                                                                                                                                                                                                                                                                                                                                                                                                                                                                                                                                                                                                                                                                                                                                                                                                                                                   | 2018019 |
| 205 | exp Greece/                                                                                                                                                                                                                                                                                                                                                                                                                                                                                                                                                                                                                                                                                                                                                                                                                                                                                                                                                                                                                                                                                                                                                                                                                                                                                                                                                                                                                                                                                                                                                                                                                                                                                                                                                                                                                                                                                                                                                                                                                                                                                                                                                                                                                                                                                                                                                                                                                                                                   | 24175   |
| 206 | exp "Greek (citizen)"/                                                                                                                                                                                                                                                                                                                                                                                                                                                                                                                                                                                                                                                                                                                                                                                                                                                                                                                                                                                                                                                                                                                                                                                                                                                                                                                                                                                                                                                                                                                                                                                                                                                                                                                                                                                                                                                                                                                                                                                                                                                                                                                                                                                                                                                                                                                                                                                                                                                        | 691     |
| 207 | exp "Greek (people)"/                                                                                                                                                                                                                                                                                                                                                                                                                                                                                                                                                                                                                                                                                                                                                                                                                                                                                                                                                                                                                                                                                                                                                                                                                                                                                                                                                                                                                                                                                                                                                                                                                                                                                                                                                                                                                                                                                                                                                                                                                                                                                                                                                                                                                                                                                                                                                                                                                                                         | 313     |

|     |                                                                                                                                                                                                                                                                                                                                                                                                                                                                                                                                                                                                                                                                                                                                                                                                                                                                                                                                                                                                                                                                                                                                                                                                                                                                                                                                        |         |
|-----|----------------------------------------------------------------------------------------------------------------------------------------------------------------------------------------------------------------------------------------------------------------------------------------------------------------------------------------------------------------------------------------------------------------------------------------------------------------------------------------------------------------------------------------------------------------------------------------------------------------------------------------------------------------------------------------------------------------------------------------------------------------------------------------------------------------------------------------------------------------------------------------------------------------------------------------------------------------------------------------------------------------------------------------------------------------------------------------------------------------------------------------------------------------------------------------------------------------------------------------------------------------------------------------------------------------------------------------|---------|
| 208 | (greece or 'hellenic republic' or greek* or ellada or elladas or 'elliniki dimokratia' or hellas or hellenes or attica or attiki or makedonia* or macedonia or thraki or thrace or crete or kriti or 'ionia nisia' or 'ionion neson' or 'ionion nison' or 'ionian islands' or 'ionian island' or epirus or ipeiros or 'perifereia ipeirou' or 'north aegean' or 'northern aegean' or 'aegean islands' or 'aegean island' or 'nisoï agaiou' or 'notio aigaiou' or peloponnese or peloponniso* or thessaly or thessalia or thessalian or petthalia or 'voreio aigaiou' or 'voreio aigaiou' or 'south aegean' or 'southern aegean' or 'mount athos' or 'oros athos' or cyclades or cycklades or kyklades or dodecanese or dodekanisa or athens or athina or thessaloniki or thessalonica or patras or patra or pireas or piraeus or larissa or larisa or heraklion or heraclion or iraklion or irakleion or iraklio or volos or rhodes or rodos or ioannina or janina or yannena or chania or chalcis or chalkida).ab,in,ti.                                                                                                                                                                                                                                                                                                              | 249296  |
| 209 | exp Hungary/                                                                                                                                                                                                                                                                                                                                                                                                                                                                                                                                                                                                                                                                                                                                                                                                                                                                                                                                                                                                                                                                                                                                                                                                                                                                                                                           | 17340   |
| 210 | exp "Hungarian (citizen)"/                                                                                                                                                                                                                                                                                                                                                                                                                                                                                                                                                                                                                                                                                                                                                                                                                                                                                                                                                                                                                                                                                                                                                                                                                                                                                                             | 919     |
| 211 | exp "Magyar (people)"/                                                                                                                                                                                                                                                                                                                                                                                                                                                                                                                                                                                                                                                                                                                                                                                                                                                                                                                                                                                                                                                                                                                                                                                                                                                                                                                 | 82      |
| 212 | (hungar* or magyarország or magyar* or dunantuli or transdanubia or dunantul or 'great plain' or 'eszak alföld' or 'del alföld' or 'alföld es eszak' or 'northern alföld' or 'north alföld' or 'south alföld' or 'southern alföld' or bacs or kiskun or baranya or bekes or borsod or abauj or zemplen or budapest or csongrad or fejer or moson or sopron or hajdu or bihar or heves or 'jasz nagykun szolnok' or komarom or esztergom or nograd or (pest adj3 (megye or county)) or somogy or szabolcs or szatmar or bereg or tolna or vas or veszprem or zala or debrecen or miskolc or szeged or pecs or gyor or nyiregyhaza or kecskemet or szekesfehervar or szombathely).ab,in,ti.                                                                                                                                                                                                                                                                                                                                                                                                                                                                                                                                                                                                                                              | 207584  |
| 213 | exp Ireland/                                                                                                                                                                                                                                                                                                                                                                                                                                                                                                                                                                                                                                                                                                                                                                                                                                                                                                                                                                                                                                                                                                                                                                                                                                                                                                                           | 32125   |
| 214 | exp "Irish (citizen)"/                                                                                                                                                                                                                                                                                                                                                                                                                                                                                                                                                                                                                                                                                                                                                                                                                                                                                                                                                                                                                                                                                                                                                                                                                                                                                                                 | 959     |
| 215 | (ireland or eire or irish* or fíngal or 'fine gall' or dublin or 'ath cliath' or 'dun laoghaire' or wicklow or 'cill mhantain' or 'chill mhantain' or wexford or 'loch garman' or carlow or ceatharlach or kildare or 'cill dara' or 'chill dara' or meath or 'an mhi' or 'contae na mi' or louth or 'contae lu' or monaghan or muineachan or mhuineachain or cavan or 'an cabhan' or 'an cabhain' or longford or 'an longfort' or 'an longfoirt' or langfurd or westmeath or 'an iarmhi' or 'na iarmhi' or offaly or 'uibh fhaili' or laois or laoise or kilkenny or 'chill chainnigh' or 'cill chainnigh' or waterford or 'port lairge' or watterford or cork or corcaigh or chorcai or kerry or ciarraí or chiarraí or limerick or luimneach or luimnigh or tipperary or 'tiobraid arann' or 'thiobraid arann' or clare or 'an clar' or 'an chlair' or galway or gaillimh or 'na gaillimhe' or mayo or 'maigh eo' or 'mhaigh eo' or roscommon or 'ros comain' or sligo or sligeach or shligigh or leitrim or liatroidim or liatroma or donegal or 'dhun na ngall' or dinnygal or dunnyga or leinster or laighin or 'cuige laighean' or munster or mumhain or 'cuige mumhan' or connacht or connachta or drogheda or 'droichead atha' or dundalk or 'dun dealgan' or swords or sord or bray or bre or navan or 'an uaimh').ab,in,ti. | 554872  |
| 216 | exp Italy/                                                                                                                                                                                                                                                                                                                                                                                                                                                                                                                                                                                                                                                                                                                                                                                                                                                                                                                                                                                                                                                                                                                                                                                                                                                                                                                             | 101255  |
| 217 | exp "Italian (citizen)"/                                                                                                                                                                                                                                                                                                                                                                                                                                                                                                                                                                                                                                                                                                                                                                                                                                                                                                                                                                                                                                                                                                                                                                                                                                                                                                               | 3886    |
| 218 | exp Italic people/                                                                                                                                                                                                                                                                                                                                                                                                                                                                                                                                                                                                                                                                                                                                                                                                                                                                                                                                                                                                                                                                                                                                                                                                                                                                                                                     | 3       |
| 219 | (italy or italia* or abruzzo or abruzzu or basilicata or lucania or calabria or campania or 'emilia romagna' or 'friuli venezia giulia' or lazio or latium or liguria* or lombardy or lombardia or marche or marches or molisano or molise or piedmont* or piemonte or bolzano or bozen or trentino or trento or puglia or apulia or sardinia or sardegna or sicily or sicilia or toscana or tuscany or umbria or 'valle d aosta' or 'vallee d aoste' or 'aosta valley' or veneto or venetia or triveneto or rome or roma or milan or milano or naples or napoli or turin or torino or palermo or genoa or genova or bologna or florence or firenze or bari or catania).ab,in,ti.                                                                                                                                                                                                                                                                                                                                                                                                                                                                                                                                                                                                                                                      | 1298554 |
| 220 | exp Latvia/                                                                                                                                                                                                                                                                                                                                                                                                                                                                                                                                                                                                                                                                                                                                                                                                                                                                                                                                                                                                                                                                                                                                                                                                                                                                                                                            | 2051    |

|     |                                                                                                                                                                                                                                                                                                                                                                                                                                                                                                                                                                                                                                                                                                                                                                      |        |
|-----|----------------------------------------------------------------------------------------------------------------------------------------------------------------------------------------------------------------------------------------------------------------------------------------------------------------------------------------------------------------------------------------------------------------------------------------------------------------------------------------------------------------------------------------------------------------------------------------------------------------------------------------------------------------------------------------------------------------------------------------------------------------------|--------|
| 221 | exp "Latvian (citizen)"/                                                                                                                                                                                                                                                                                                                                                                                                                                                                                                                                                                                                                                                                                                                                             | 68     |
| 222 | exp "Lett (people)"/                                                                                                                                                                                                                                                                                                                                                                                                                                                                                                                                                                                                                                                                                                                                                 | 17     |
| 223 | (latvi* or riga or courland or kurzeme or kurland or latgale or lettgallia or latgola or latgalia or vidzeme or vidumo or semigallia or semigalia or zemgale or pieriga or daugavpils or dinaburg or jekabpils or jakobstadt or jelgava or jurmala or liepaja or libau or rezekne or rezne or rositten or valmiera or wolmar or ventspils or windau or ogre).ab,in,ti.                                                                                                                                                                                                                                                                                                                                                                                               | 9710   |
| 224 | exp Lithuania/                                                                                                                                                                                                                                                                                                                                                                                                                                                                                                                                                                                                                                                                                                                                                       | 3737   |
| 225 | exp "Lithuanian (people)"/ or exp "Lithuanian (citizen)"/                                                                                                                                                                                                                                                                                                                                                                                                                                                                                                                                                                                                                                                                                                            | 138    |
| 226 | (lithuania* or 'lietuvos respublika' or lietuva or lietuviu or alytus or alytaus or kaunas or kauno or klaipeda or klaipedos or marijampoles or marijampole or panevezys or panevezio or siauliai or siauliu or taurages or taurage or telsiu or telsiai or utenos or utena or vilnius or vilniaus or mazeikiai or jonava or mazeikiu or jonavos).ab,in,ti.                                                                                                                                                                                                                                                                                                                                                                                                          | 17324  |
| 227 | exp Luxembourg/                                                                                                                                                                                                                                                                                                                                                                                                                                                                                                                                                                                                                                                                                                                                                      | 1166   |
| 228 | (luxembourg* or luxemburg or letzebuerg or grevenmacher or 'esch sur alzette' or 'esch uelzecht' or 'esch an der alzette' or 'esch an der alzig' or dudelage or diddeleng or dudelingen or duedelingen or schifflange or scheffleng or schifflingen or bettembourg or beetebuerg or bettemburg or petange or peiteng or petingen or ettelbruck or ettelbreck or ettelbrueck or diekirch or dikrech or strassen or stroossen or bertrange or bartreng or bartringen).ab,in,ti.                                                                                                                                                                                                                                                                                        | 10592  |
| 229 | exp Malta/                                                                                                                                                                                                                                                                                                                                                                                                                                                                                                                                                                                                                                                                                                                                                           | 1448   |
| 230 | exp "Maltese (citizen)"/                                                                                                                                                                                                                                                                                                                                                                                                                                                                                                                                                                                                                                                                                                                                             | 109    |
| 231 | (malta or maltese* or maltin or gozo or ghawdex or valletta or 'ill belt' or birkirkara or 'b kara' or birchircara or mosta or qormi or 'st paul s bay' or 'pawl il bahar' or zabbar or sliema or naxxar or gwann or 'st john' or zebbug or 'citta rohan' or fgura).ab,in,ti.                                                                                                                                                                                                                                                                                                                                                                                                                                                                                        | 17697  |
| 232 | exp Netherlands/                                                                                                                                                                                                                                                                                                                                                                                                                                                                                                                                                                                                                                                                                                                                                     | 73365  |
| 233 | exp Dutchman/                                                                                                                                                                                                                                                                                                                                                                                                                                                                                                                                                                                                                                                                                                                                                        | 1694   |
| 234 | (netherlands or nederland* or dutch* or drenthe or flevoland or friesland or fryslan or frisia or gelderland or guelders or groningen or limburg or brabant or holland or overijssel or overijssel or utrecht or zeeland or amsterdam or rotterdam or hague or 's-gravenhage' or 'den haag' or eindhoven or tilburg or almere or breda or nijmegen or nimeguen).ab,in,ti.                                                                                                                                                                                                                                                                                                                                                                                            | 777122 |
| 235 | exp Poland/                                                                                                                                                                                                                                                                                                                                                                                                                                                                                                                                                                                                                                                                                                                                                          | 43036  |
| 236 | exp Polish citizen/                                                                                                                                                                                                                                                                                                                                                                                                                                                                                                                                                                                                                                                                                                                                                  | 1244   |
| 237 | exp "Pole (people)"/                                                                                                                                                                                                                                                                                                                                                                                                                                                                                                                                                                                                                                                                                                                                                 | 88     |
| 238 | (poland or polska or polish or pole or poles or polski or polak or polka or polacy or dolnoslaskie or silesia* or slask or pomorskie or pomerania* or kujawsko or kujavian or lodzkie or lodz or lubelskie or lublin or lubuskie or lubusz or lubus or malopolskie or mazowieckie or mazowske or masovia or masovian or opolskie or opole or podkarpackie or subcarpathian* or podlaskie or podlachia or podlasie or slaskie or swietokrzyskie or 'varmia mazuria' or 'varmian mazurian' or 'varmia masuria' or 'varmian masurian' or 'warmia mazury' or 'warminsko mazurskie' or 'warmian masurian' or wielkopolskie or zachodniopomorskie or warsaw or warszawa or krakow or cracow or wroclaw or poznan or gdansk or szczecin or bydgoszcz or katowice).ab,in,ti. | 379870 |
| 239 | exp Portugal/                                                                                                                                                                                                                                                                                                                                                                                                                                                                                                                                                                                                                                                                                                                                                        | 17730  |

|     |                                                                                                                                                                                                                                                                                                                                                                                                                                                                                                                                                                                                                                                                                                                                                                                                                                                                                                                                                  |        |
|-----|--------------------------------------------------------------------------------------------------------------------------------------------------------------------------------------------------------------------------------------------------------------------------------------------------------------------------------------------------------------------------------------------------------------------------------------------------------------------------------------------------------------------------------------------------------------------------------------------------------------------------------------------------------------------------------------------------------------------------------------------------------------------------------------------------------------------------------------------------------------------------------------------------------------------------------------------------|--------|
| 240 | exp "Portuguese (citizen)"/                                                                                                                                                                                                                                                                                                                                                                                                                                                                                                                                                                                                                                                                                                                                                                                                                                                                                                                      | 1727   |
| 241 | (portugal or portugues* or azores or acores or madeira or alentejo or algarve or lisboa or lisbon or 'alto tras-os-montes' or (ave adj3 (community or intermunicipal or comunidade)) or mondego or vouga or beira or cavado or lafoes or douro or porto or oporto or tejo or minho or setubal or pinhal or 'serra da estrela' or tamega or leira or santarem or beja or faro or evora or portalegre or 'castelo branco' or guarda or cimbra or aveiro or viseu or braganca or braganza or braga or 'vila real' or 'viana do castelo' or gaia or amadora or funchal or coimbra or almada or (agualva and cacem)).ab,in,ti.                                                                                                                                                                                                                                                                                                                        | 222351 |
| 242 | exp Romania/                                                                                                                                                                                                                                                                                                                                                                                                                                                                                                                                                                                                                                                                                                                                                                                                                                                                                                                                     | 11634  |
| 243 | exp "Romanian (citizen)"/                                                                                                                                                                                                                                                                                                                                                                                                                                                                                                                                                                                                                                                                                                                                                                                                                                                                                                                        | 499    |
| 244 | (romania* or rumania* or roumania* or romani or rumani or alba or arad or arges or bacau or bihor or 'bistrita nasaud' or botosani or braila or brasov or kronstadt or brasso or brassovia or coron or bucharest or bucuresti or buzau or calarasi or 'caras-severin' or cluj or klausenburg or kolozsvar or constanta or tomis or konstantia or kostence or covasna or dambovita or dolj or galati or galatz or galac or kalas or giurgiu or gorj or harghita or hunedoara or ialomita or iasi or jassy or lassy or ilfov or maramures or mehedinti or mures or neamt or (olt and (river or county or region or judetul or raul)) or prahova or salaj or 'satu mare' or sibiu or suceava or teleorman or timis or tulcea or valcea or vilcea or vaslui or vrancea or timisoara or temeswar or temeschburg or temeschwar or temesvar or temisvar or timisvar or temesva or craiova or ploiesti or ploesti or oradea or varad or varat).ab,in,ti. | 90588  |
| 245 | exp Slovakia/                                                                                                                                                                                                                                                                                                                                                                                                                                                                                                                                                                                                                                                                                                                                                                                                                                                                                                                                    | 5129   |
| 246 | exp "Slovak (people)"/ or exp "Slovak (citizen)"/                                                                                                                                                                                                                                                                                                                                                                                                                                                                                                                                                                                                                                                                                                                                                                                                                                                                                                | 169    |
| 247 | (slovakia or slovak* or slovaci or slovenki or bratislav* or presporok or pressburg or pressburg or posonium or banskobystri* or 'banska bystrica' or neusohl or besztercebanya or kosic* or kaschau or kassa or nitrian* or nitra or neutra or nyitra or nyitria or trnav* or tyrnau or nagyszombat or tyrnavia or presov* or trencian* or trencin or trentschin or trencsen or zilina or sillein or zsolna or zylina or (martin and (city or svaty)) or turocszentmarton or poprad or deutschendorf or zvolen).ab,in,ti.                                                                                                                                                                                                                                                                                                                                                                                                                       | 55180  |
| 248 | exp Slovenia/                                                                                                                                                                                                                                                                                                                                                                                                                                                                                                                                                                                                                                                                                                                                                                                                                                                                                                                                    | 4691   |
| 249 | exp "Slovenian (citizen)"/                                                                                                                                                                                                                                                                                                                                                                                                                                                                                                                                                                                                                                                                                                                                                                                                                                                                                                                       | 203    |
| 250 | exp "Slovene (people)"/                                                                                                                                                                                                                                                                                                                                                                                                                                                                                                                                                                                                                                                                                                                                                                                                                                                                                                                          | 20     |
| 251 | (slovenia* or slovenija or slovensk* or slovinci or slovene* or gorenjska or carniola or goriska or gorizia or jugovzhodna or koroska or carinthia or 'notranjsko kraska' or 'obalno kraska' or 'coastal karst' or osrednjeslovenska or podravska or drava or pomurska or mura or savinjska or savinja or spodnjeposavska or zasavska or 'central sava' or posavska or 'lower sava' or ljubljana or laibach or lubiana or maribor or 'marburg an der drau' or kranj or carnium or creina or chreina or krainbur or koper or capodistria or kopar or celje or 'novo mesto' or neustadt/ or domzale or velenje or wollan or woellan or 'nova gorica' or kamnik).ab,in,ti.                                                                                                                                                                                                                                                                          | 45407  |
| 252 | exp Spain/                                                                                                                                                                                                                                                                                                                                                                                                                                                                                                                                                                                                                                                                                                                                                                                                                                                                                                                                       | 87383  |
| 253 | exp Spaniard/                                                                                                                                                                                                                                                                                                                                                                                                                                                                                                                                                                                                                                                                                                                                                                                                                                                                                                                                    | 1830   |
| 254 | exp "Basque (people)"/                                                                                                                                                                                                                                                                                                                                                                                                                                                                                                                                                                                                                                                                                                                                                                                                                                                                                                                           | 103    |
| 255 | ((((spain or espana or spanish or espanol* or spaniard* or andalucia or andalusia or aragon or arago or cantabria or canarias or 'canary islands' or (canaries and island*) or 'castile and leon') or 'castilla y leon' or 'castile la mancha' or 'castilla la mancha' or                                                                                                                                                                                                                                                                                                                                                                                                                                                                                                                                                                                                                                                                        | 907889 |

|     |                                                                                                                                                                                                                                                                                                                                                                                                                                                                                                                                                                                                                                                                                                                                                                                                                                                                                                                                                                                                                                                                                                                                                                                                                                                                                                                                                                                                                                                                                                                                                                                                                                                                                                                                                                                                                                                                                                                                                                                                                                                                                                                                                                                                                                                                                                                                                                                                                                                              |         |
|-----|--------------------------------------------------------------------------------------------------------------------------------------------------------------------------------------------------------------------------------------------------------------------------------------------------------------------------------------------------------------------------------------------------------------------------------------------------------------------------------------------------------------------------------------------------------------------------------------------------------------------------------------------------------------------------------------------------------------------------------------------------------------------------------------------------------------------------------------------------------------------------------------------------------------------------------------------------------------------------------------------------------------------------------------------------------------------------------------------------------------------------------------------------------------------------------------------------------------------------------------------------------------------------------------------------------------------------------------------------------------------------------------------------------------------------------------------------------------------------------------------------------------------------------------------------------------------------------------------------------------------------------------------------------------------------------------------------------------------------------------------------------------------------------------------------------------------------------------------------------------------------------------------------------------------------------------------------------------------------------------------------------------------------------------------------------------------------------------------------------------------------------------------------------------------------------------------------------------------------------------------------------------------------------------------------------------------------------------------------------------------------------------------------------------------------------------------------------------|---------|
|     | cataluna or catalonia or ceuta or madrid or melilla or navarra or navarre or valencia* or extremadura or galicia or balears or 'balearic islands' or 'balear islands' or baleares or 'la rioja' or 'pais vasco' or 'basque country' or 'baske region' or euskadi or asturias or coruna or alava or araba or albacete or alicante or alacant or almeria or avila or badajoz or badajos or barcelona or burgos or caceres or cadiz or castellon or castello or 'ciudad real' or cordoba or cuenca or eivissa or ibiza or formentera or 'el hierro' or fuerteventura or galiza or girona or gerona or 'gran canaria' or granada or guadalajara or guipuzcoa or gipuzkoa or huelva or huesca or jaen or 'la gomera' or 'la palma' or lanzarote or leon or lleida or lerida or lugo or malaga or mallorca or majorca or menorca or minorca or murcia or ourense or orense or palencia or pontevedra or salamanca or segovia or sevilla or seville or soria or tarragona or tenerife or teruel or toledo or valladolid or vizcaya or biscay or zamora or zaragoza or saragossa or 'las palmas' or bilbao or bilbo).ab,in,ti.                                                                                                                                                                                                                                                                                                                                                                                                                                                                                                                                                                                                                                                                                                                                                                                                                                                                                                                                                                                                                                                                                                                                                                                                                                                                                                                                       |         |
| 256 | exp Sweden/                                                                                                                                                                                                                                                                                                                                                                                                                                                                                                                                                                                                                                                                                                                                                                                                                                                                                                                                                                                                                                                                                                                                                                                                                                                                                                                                                                                                                                                                                                                                                                                                                                                                                                                                                                                                                                                                                                                                                                                                                                                                                                                                                                                                                                                                                                                                                                                                                                                  | 70763   |
| 257 | exp Swedish citizen/                                                                                                                                                                                                                                                                                                                                                                                                                                                                                                                                                                                                                                                                                                                                                                                                                                                                                                                                                                                                                                                                                                                                                                                                                                                                                                                                                                                                                                                                                                                                                                                                                                                                                                                                                                                                                                                                                                                                                                                                                                                                                                                                                                                                                                                                                                                                                                                                                                         | 1633    |
| 258 | exp "Swede (people)"/                                                                                                                                                                                                                                                                                                                                                                                                                                                                                                                                                                                                                                                                                                                                                                                                                                                                                                                                                                                                                                                                                                                                                                                                                                                                                                                                                                                                                                                                                                                                                                                                                                                                                                                                                                                                                                                                                                                                                                                                                                                                                                                                                                                                                                                                                                                                                                                                                                        | 167     |
| 259 | (sweden or sverige or swedish or svenska or svenskar or swede or swedes or norrland or mellansverige or smaland or stockholm* or sydsverige or vastsverige or blekinge or dalarna or gavleborg* or gotland* or halland* or jamtland* or jonkoping* or kalmar or kronoberg* or norrbotten* or orebro or ostergotland* or skane or sodermanlands or uppsala or varmland* or vasterbotten* or vasternorrland* or vastmanland* or vastergotland* or gotaland* or gothenburg or goteborg or malmo or vasteras or linkoping or helsingborg or halsingborg or norrkoping).ab,in,ti.                                                                                                                                                                                                                                                                                                                                                                                                                                                                                                                                                                                                                                                                                                                                                                                                                                                                                                                                                                                                                                                                                                                                                                                                                                                                                                                                                                                                                                                                                                                                                                                                                                                                                                                                                                                                                                                                                 | 503472  |
| 260 | exp United Kingdom/                                                                                                                                                                                                                                                                                                                                                                                                                                                                                                                                                                                                                                                                                                                                                                                                                                                                                                                                                                                                                                                                                                                                                                                                                                                                                                                                                                                                                                                                                                                                                                                                                                                                                                                                                                                                                                                                                                                                                                                                                                                                                                                                                                                                                                                                                                                                                                                                                                          | 384393  |
| 261 | exp British citizen/                                                                                                                                                                                                                                                                                                                                                                                                                                                                                                                                                                                                                                                                                                                                                                                                                                                                                                                                                                                                                                                                                                                                                                                                                                                                                                                                                                                                                                                                                                                                                                                                                                                                                                                                                                                                                                                                                                                                                                                                                                                                                                                                                                                                                                                                                                                                                                                                                                         | 1359    |
| 262 | ('gb' or 'united kingdom' or 'uk' or britain or british or england or english or scotland or scottish or scots or wales or cymru or welsh or 'north ireland' or 'northern ireland' or irish or avon or bedfordshire or berkshire or bristol or buckinghamshire or cambridgeshire or 'isle of ely' or cheshire or cleveland or cornwall or cumberland or cumbria or derbyshire or devon or dorset or durham or essex or gloucestershire or hampshire or southampton or (hereford and worcester) or hertfordshire or herefordshire or humberside or huntingdon or huntingdonshire or 'isle of wight' or kent or lancashire or leicestershire or lincolnshire or london or manchester or merseyside or middlesex or norfolk or northamptonshire or northumberland or nottinghamshire or oxfordshire or peterborough or rutland or shropshire or salop or somerset or yorkshire or staffordshire or suffolk or surrey or sussex or (tyne and wear) or warwickshire or midlands or westmorland or wiltshire or worcestershire or 'isle of man' or jersey or guernsey or 'channel islands' or aberdeen or aberdeenshire or angus or forfarshire or argyll or ayrshire or banffshire or berwickshire or bute or caithness or clackmannanshire or cromartysire or dumfriesshire or dunbartonshire or dumbarton or dundee or lothian or haddingtonshire or edinburgh or fife or glasgow or 'inverness shire' or kincardineshire or 'kinross shire' or kirkcudbrightshire or lanarkshire or midlothian or moray or elginshire or nairnshire or orkney or peebleshire or perthshire or renfrewshire or (ross and cromarty) or 'ross shire' or roxburghshire or selkirkshire or shetland or zetland or stirlingshire or sutherland or linlithgowshire or wigtownshire or anglesey or brecknockshire or caernarfonshire or carmarthenshire or cardiganshire or ceredigion or clwyd or denbighshire or dyfed or flintshire or glamorgan or gwent or gwynedd or merionethshire or montgomeryshire or monmouthshire or pembrokeshire or powys or radnorshire or antrim or aontroim or 'contae aontroma' or anthrim or antrim or entrim or armagh or 'ard mhacha' or airmagh or belfast or (down and (district or council or county)) or 'an dun' or 'an duin' or doon or doun or fermanagh or 'fear manach' or 'fhear manach' or fermanay or londonderry or doire or dhoire or lunnonderrie or derry or birmingham or leeds or sheffield or bradford or liverpool).ab,in,ti. | 3558263 |
| 263 | exp Liechtenstein/                                                                                                                                                                                                                                                                                                                                                                                                                                                                                                                                                                                                                                                                                                                                                                                                                                                                                                                                                                                                                                                                                                                                                                                                                                                                                                                                                                                                                                                                                                                                                                                                                                                                                                                                                                                                                                                                                                                                                                                                                                                                                                                                                                                                                                                                                                                                                                                                                                           | 112     |

|     |                                                                                                                                                                                                                                                                                                                                                                                                                                                                                                                                                                                                                                                                                                                                                                                                                                                                                             |          |
|-----|---------------------------------------------------------------------------------------------------------------------------------------------------------------------------------------------------------------------------------------------------------------------------------------------------------------------------------------------------------------------------------------------------------------------------------------------------------------------------------------------------------------------------------------------------------------------------------------------------------------------------------------------------------------------------------------------------------------------------------------------------------------------------------------------------------------------------------------------------------------------------------------------|----------|
| 264 | (liechtenstein or lienchtensteiner* or balzers or eschen or gamprin or mauren or planken or ruggell or schaan or schellenberg or triesen or triesenberg or vaduz).ab,in,ti.                                                                                                                                                                                                                                                                                                                                                                                                                                                                                                                                                                                                                                                                                                                 | 3694     |
| 265 | exp Norway/                                                                                                                                                                                                                                                                                                                                                                                                                                                                                                                                                                                                                                                                                                                                                                                                                                                                                 | 38549    |
| 266 | exp "Norwegian (people)"/ or exp "Norwegian (citizen)"/                                                                                                                                                                                                                                                                                                                                                                                                                                                                                                                                                                                                                                                                                                                                                                                                                                     | 1307     |
| 267 | (norway or norwegian* or norge or noreg or norgga or akershus or 'aust agder' or buskerud or finnmark or hedmark or hordaland or 'more og romsdal' or (more and romsdal) or 'more romsdal' or nordland or trondelag or oppland or oslo or ostfold or rogaland or 'sogn og fjordane' or (sogn and Fjordane) or 'sogn fjordane' or telemark or troms or romsa or romssa or 'vest agder' or vestfold or bergen or stavanger or sandnes or trondheim or trondhjem or kaupangen or nidaros or drammen or fredrikstad or skien or tromso or sarpsborg).ab,in,ti.                                                                                                                                                                                                                                                                                                                                  | 204437   |
| 268 | exp Switzerland/                                                                                                                                                                                                                                                                                                                                                                                                                                                                                                                                                                                                                                                                                                                                                                                                                                                                            | 35145    |
| 269 | exp Swiss/                                                                                                                                                                                                                                                                                                                                                                                                                                                                                                                                                                                                                                                                                                                                                                                                                                                                                  | 2594     |
| 270 | (switzerland or schweiz or schweizerische or swiss or suisse* or svizzera or svizzeri or svizzers or svizra or helvetica or aargau or argovia or ausserrhoden or 'outer rhodes' or innerrhoden or 'inner rhodes' or basel or bale or basilea or bern or berne or berna or fribourg or freiburg or friburg or geneva or geneve or genf or ginevra or genevra or glarus or graubunden or graubunden or grisons or grigioni or grischun or jura or lucerne or luzern or neuchatel or nidwalden or nidwald or obwalden or obwald or schaffhausen or schaffhouse or schwyz or solothurn or soleure or thurgau or thurgovia or ticino or tessin or uri or valais or wallis or vaud or zug or zurich or zuerich or zurigo or lausanne or losanna or winterthur or winterthour or 'st gallen' or 'saint gallen' or 'sankt gallen' or 'saint gall' or 'san gallo' or 'son gagl' or turitg).ab,in,ti. | 717154   |
| 271 | exp Iceland/                                                                                                                                                                                                                                                                                                                                                                                                                                                                                                                                                                                                                                                                                                                                                                                                                                                                                | 5403     |
| 272 | exp Icelander/                                                                                                                                                                                                                                                                                                                                                                                                                                                                                                                                                                                                                                                                                                                                                                                                                                                                              | 117      |
| 273 | (iceland or icelandic* or islenska* or icelander* or islendinga* or islendigar or inslenska or reykjavik or reykjavikurborg or hofudborgarsvaedi or sudurnes or vesturland or vestfirdir or westfjords or nordurland or austurland or sudurland or kopavogur or hafnarfjordur or akureyri or gardabaer or mosfellsbaer or keflavik or akranes or selfoss or seltjarnarnes).ab,in,ti.                                                                                                                                                                                                                                                                                                                                                                                                                                                                                                        | 15187    |
| 274 | 151 or 152 or 153 or 154 or 155 or 156 or 157 or 158 or 159 or 160 or 161 or 162 or 163 or 164 or 165 or 166 or 167 or 168 or 169 or 170 or 171 or 172 or 173 or 174 or 175 or 176 or 177 or 178 or 179 or 180 or 181 or 182 or 183 or 184 or 185 or 186 or 187 or 188 or 189 or 190 or 191 or 192 or 193 or 194 or 195 or 196 or 197 or 198 or 199 or 200 or 201 or 202 or 203 or 204 or 205 or 206 or 207 or 208 or 209 or 210 or 211 or 212 or 213 or 214 or 215 or 216 or 217 or 218 or 219 or 220 or 221 or 222 or 223 or 224 or 225 or 226 or 227 or 228 or 229 or 230 or 231 or 232 or 233 or 234 or 235 or 236 or 237 or 238 or 239 or 240 or 241 or 242 or 243 or 244 or 245 or 246 or 247 or 248 or 249 or 250 or 251 or 252 or 253 or 254 or 255 or 256 or 257 or 258 or 259 or 260 or 261 or 262 or 263 or 264 or 265 or 266 or 267 or 268 or 269 or 270 or 271 or 272 or 273   | 12710169 |
| 275 | 25 and 150 and 274                                                                                                                                                                                                                                                                                                                                                                                                                                                                                                                                                                                                                                                                                                                                                                                                                                                                          | 24055    |
| 276 | limit 275 to (conference abstract or conference paper or editorial or letter or note)                                                                                                                                                                                                                                                                                                                                                                                                                                                                                                                                                                                                                                                                                                                                                                                                       | 6617     |
| 277 | 275 not 276                                                                                                                                                                                                                                                                                                                                                                                                                                                                                                                                                                                                                                                                                                                                                                                                                                                                                 | 17438    |
| 278 | limit 277 to yr="2009 -Current"                                                                                                                                                                                                                                                                                                                                                                                                                                                                                                                                                                                                                                                                                                                                                                                                                                                             | 8832     |

**Supplementary Table S1c. Search string – Cochrane Library**

| Search | Terms                                                                                                                                                                                                                                                                                                                                                                                                                                                               | Results |
|--------|---------------------------------------------------------------------------------------------------------------------------------------------------------------------------------------------------------------------------------------------------------------------------------------------------------------------------------------------------------------------------------------------------------------------------------------------------------------------|---------|
| #1     | MeSH descriptor: [Prevalence] explode all trees                                                                                                                                                                                                                                                                                                                                                                                                                     | 4656    |
| #2     | MeSH descriptor: [Population Surveillance] explode all trees                                                                                                                                                                                                                                                                                                                                                                                                        | 625     |
| #3     | MeSH descriptor: [Seroepidemiologic Studies] explode all trees                                                                                                                                                                                                                                                                                                                                                                                                      | 117     |
| #4     | MeSH descriptor: [Epidemiological Monitoring] explode all trees                                                                                                                                                                                                                                                                                                                                                                                                     | 29      |
| #5     | (seroepidemiolog* OR epidemiolog* OR surveillance* OR serolog* OR serosurvey* OR seroprevalen* OR seropositiv* OR (sero NEXT/2 (survey* OR epidemiolog* OR prevalen* OR positiv*)):ti,ab,kw (Word variations have been searched)                                                                                                                                                                                                                                    | 60204   |
| #6     | #1 OR #2 OR #3 OR #4 OR #5                                                                                                                                                                                                                                                                                                                                                                                                                                          | 60702   |
| #7     | MeSH descriptor: [HIV Infections] this term only                                                                                                                                                                                                                                                                                                                                                                                                                    | 8989    |
| #8     | MeSH descriptor: [HIV] explode all trees                                                                                                                                                                                                                                                                                                                                                                                                                            | 2896    |
| #9     | (hiv OR (human NEXT/3 (immune* OR immune*) NEXT/3 virus*)):ti,ab,kw (Word variations have been searched)                                                                                                                                                                                                                                                                                                                                                            | 19254   |
| #10    | #7 OR #8 OR #9                                                                                                                                                                                                                                                                                                                                                                                                                                                      | 19254   |
| #11    | #6 AND #10                                                                                                                                                                                                                                                                                                                                                                                                                                                          | 3283    |
| #12    | MeSH descriptor: [HIV Seroprevalence] explode all trees                                                                                                                                                                                                                                                                                                                                                                                                             | 19      |
| #13    | MeSH descriptor: [HIV Seropositivity] explode all trees                                                                                                                                                                                                                                                                                                                                                                                                             | 702     |
| #14    | ((((prevalen* OR seroprevalen* OR "sero prevalent" OR "sero prevalents" OR "sero prevalence" OR "sero prevalences" OR serodiagnos* OR serolog* OR diagnos* OR screen*) NEAR/10 hiv) OR ((prevalen* OR seroprevalen* OR "sero prevalent" OR "Sero prevalents" OR "sero prevalence" OR "sero prevalences" OR serodiagnos* OR serolog* OR diagnos* OR screen*) NEAR/10 human NEXT/3 (immune* OR immuno*) NEXT/3 virus*)):ti,ab,kw (Word variations have been searched) | 5208    |
| #15    | #12 OR #13 OR #14                                                                                                                                                                                                                                                                                                                                                                                                                                                   | 5700    |
| #16    | #11 OR #15                                                                                                                                                                                                                                                                                                                                                                                                                                                          | 7203    |
| #17    | MeSH descriptor: [Emigrants and Immigrants] explode all trees                                                                                                                                                                                                                                                                                                                                                                                                       | 148     |
| #18    | MeSH descriptor: [Transients and Migrants] explode all trees                                                                                                                                                                                                                                                                                                                                                                                                        | 64      |
| #19    | (emigrant* OR immigrant* OR migrant* OR refugee* OR alien* OR migrat* OR emigrat* OR immigrat* OR minorit* OR foreigner* OR minority OR minorities OR origin* OR nationality OR (foreign* NEAR/2 born*) OR resettlement* displaced* OR asylum*:ti,ab,kw (Word variations have been searched)                                                                                                                                                                        | 21094   |



|     |                                                                                                                                                                                                                                                                                                                                                                                                                                                                                                                                                                             |       |
|-----|-----------------------------------------------------------------------------------------------------------------------------------------------------------------------------------------------------------------------------------------------------------------------------------------------------------------------------------------------------------------------------------------------------------------------------------------------------------------------------------------------------------------------------------------------------------------------------|-------|
| #20 | #17 OR #18 OR #19                                                                                                                                                                                                                                                                                                                                                                                                                                                                                                                                                           | 21094 |
| #21 | MeSH descriptor: [Prisoners] explode all trees                                                                                                                                                                                                                                                                                                                                                                                                                                                                                                                              | 286   |
| #22 | MeSH descriptor: [Prisons] explode all trees                                                                                                                                                                                                                                                                                                                                                                                                                                                                                                                                | 107   |
| #23 | (incarcerat* OR inmate* OR prisoner* OR confinement OR gaol* OR jail* OR penitentiary* OR prison* OR reformatory* OR custodial OR custody OR custodies OR remand* OR detention* OR detainee* OR imprison* OR cellmate* OR convict* OR offender OR offenders OR ((correctional* OR penal OR internment OR closed) NEXT/5 (facilit* OR institution* OR camp* OR setting*)):ti,ab,kw                                                                                                                                                                                           | 4522  |
| #24 | #21 OR #22 OR #23                                                                                                                                                                                                                                                                                                                                                                                                                                                                                                                                                           | 4523  |
| #25 | MeSH descriptor: [Bisexuality] explode all trees                                                                                                                                                                                                                                                                                                                                                                                                                                                                                                                            | 49    |
| #26 | MeSH descriptor: [Homosexuality, Male] explode all trees                                                                                                                                                                                                                                                                                                                                                                                                                                                                                                                    | 293   |
| #27 | MeSH descriptor: [Sexual and Gender Minorities] explode all trees                                                                                                                                                                                                                                                                                                                                                                                                                                                                                                           | 39    |
| #28 | msm OR masm OR msmw OR gbmsm OR gb-msm OR cruisin* OR queer* OR ((men OR man OR male OR males) NEXT/3 (who OR has OR have OR having OR had OR report* OR inform*) NEXT/3 sex* NEXT/3 (men OR man OR male OR males)) OR ('male to male' NEAR/3 sex* NEAR/3 contact) OR ((gay* OR homosexual* OR bisexual* OR "non heterosexual" OR "non heterosexuals" OR "non binary" OR lesbigay* OR lbg) NEAR/5 (men OR man OR male OR males))                                                                                                                                            | 1507  |
| #29 | #25 OR #26 OR #27 OR #28                                                                                                                                                                                                                                                                                                                                                                                                                                                                                                                                                    | 1527  |
| #30 | MeSH descriptor: [Transgender Persons] explode all trees                                                                                                                                                                                                                                                                                                                                                                                                                                                                                                                    | 19    |
| #31 | MeSH descriptor: [Transsexualism] explode all trees                                                                                                                                                                                                                                                                                                                                                                                                                                                                                                                         | 26    |
| #32 | (transgender* OR transpeople OR transperson* OR tran*sex* OR transm*n OR transwom?n OR "two spirit person" OR "two spirit persons" OR "two spirit individual" OR "two spirit individuals" OR "two spirit people" OR glbt OR glbtq OR glbtqq OR lgbt OR lgbtq OR lgbtqq OR (trans NEXT/2 (man OR men OR male OR males OR wom?n OR female* OR gender* OR person* OR people OR individual* OR sex*)) OR ((gender* OR sex*) NEXT/3 (variant* OR reassign* OR dissident*)) OR (intersex NEXT/3 (individual* OR people OR person*)):ti,ab,kw (Word variations have been searched) | 8275  |
| #33 | #30 OR #31 OR #32                                                                                                                                                                                                                                                                                                                                                                                                                                                                                                                                                           | 8275  |
| #34 | MeSH descriptor: [Sex Work] explode all trees                                                                                                                                                                                                                                                                                                                                                                                                                                                                                                                               | 96    |
| #35 | MeSH descriptor: [Sex Workers] explode all trees                                                                                                                                                                                                                                                                                                                                                                                                                                                                                                                            | 49    |
| #36 | ((sex* NEAR/3 (transactional OR work* OR industr* OR exchange OR survival OR paid)) OR prostitut* OR fsw OR msw OR whore* OR "call girl" OR "call girls" OR streetwalker* OR nightwalker* OR "lad of the night" OR "lads of the night" OR "walk the pavement" OR "walk the pavements"):ti,ab,kw (Word variations have been searched)                                                                                                                                                                                                                                        | 771   |

|     |                                                                                                                          |        |
|-----|--------------------------------------------------------------------------------------------------------------------------|--------|
| #37 | #34 OR #35 OR #36                                                                                                        | 771    |
| #38 | MeSH descriptor: [Gravidity] explode all trees                                                                           | 56     |
| #39 | MeSH descriptor: [Pregnancy] explode all trees                                                                           | 6925   |
| #40 | MeSH descriptor: [Pregnant Women] explode all trees                                                                      | 182    |
| #41 | MeSH descriptor: [Prenatal Care] explode all trees                                                                       | 1268   |
| #42 | MeSH descriptor: [Prenatal Diagnosis] explode all trees                                                                  | 749    |
| #43 | (pregnant* OR pregnanc* OR gravid* OR "child bearing" OR childbearing OR antenatal OR "ante natal"):ti,ab,kw             | 51627  |
| #44 | #38 OR #39 OR #40 OR #41 OR #42 OR #43                                                                                   | 51816  |
| #45 | MeSH descriptor: [Substance Abuse, Intravenous] explode all trees                                                        | 378    |
| #46 | (pwid OR idu OR ivdu OR<br>((inject* OR intraven* OR parenteral OR use OR misuse) NEAR/3 (drug* OR substance*)):ti,ab,kw | 25441  |
| #47 | #45 OR #46                                                                                                               | 25552  |
| #48 | #20 OR #24 OR #29 OR #33 OR #37 OR #44 OR #47                                                                            | 107802 |
| #49 | #16 AND #48 with Cochrane Library publication date between Jan 2009 and Oct 2019                                         | 2184   |
|     | [Results in Cochrane Database of Systematic Reviews (CDSR)]                                                              | 51     |

**Supplementary Table S2. Inclusion and exclusion criteria**

| Inclusion criteria                                                                                                                                                                   | Exclusion criteria                                                                                                                                                                                                                                                                                                                                                                                                                                                                                                                                                                                                                                                                                                                                                                                                                                                                                                                                                                                                                                                                                                         |
|--------------------------------------------------------------------------------------------------------------------------------------------------------------------------------------|----------------------------------------------------------------------------------------------------------------------------------------------------------------------------------------------------------------------------------------------------------------------------------------------------------------------------------------------------------------------------------------------------------------------------------------------------------------------------------------------------------------------------------------------------------------------------------------------------------------------------------------------------------------------------------------------------------------------------------------------------------------------------------------------------------------------------------------------------------------------------------------------------------------------------------------------------------------------------------------------------------------------------------------------------------------------------------------------------------------------------|
| Articles published in 2009 or later reporting data from populations sampled in 2004 or later, including studies with data collection ending after 2004 (irrespective of start date). | Articles falling outside the specified sampling period or publication date range.                                                                                                                                                                                                                                                                                                                                                                                                                                                                                                                                                                                                                                                                                                                                                                                                                                                                                                                                                                                                                                          |
| Articles reporting data from one or more EU/EEA Member States (see Table 4) and/or any of their regions/districts (overseas territories included).                                   | Articles reporting data on non-EU/EEA countries only or not separating EU/EEA data out from non-EU/EEA country data.                                                                                                                                                                                                                                                                                                                                                                                                                                                                                                                                                                                                                                                                                                                                                                                                                                                                                                                                                                                                       |
| Articles with the main purpose of assessing HIV prevalence in humans.                                                                                                                | Articles not reporting data on HIV prevalence, or if virological markers tested for were not specified in the article.<br>Articles with the main aim of offering testing or assessing/evaluating a testing intervention but also reporting on positivity (will often be biased toward high-risk groups, previous positives will be excluded).<br>Articles reporting only self-reported HIV prevalence.                                                                                                                                                                                                                                                                                                                                                                                                                                                                                                                                                                                                                                                                                                                     |
| Articles reporting data from key population groups listed in Table 1.<br>Studies conducted in healthcare settings such as STI clinics, OST centres, gynaecologist etc.               | Studies sampling only MSM practicing chemsex.<br>Studies of health care workers, military personnel or in/outpatients (patients in hospital settings and emergency departments, including specific diagnosis-related populations such as persons with hepatitis, tuberculosis, concurrent STIs and other indicator conditions, as well as blood donors                                                                                                                                                                                                                                                                                                                                                                                                                                                                                                                                                                                                                                                                                                                                                                     |
| Peer-reviewed published literature.                                                                                                                                                  | Grey literature, including prevalence data published in national reports, conference abstracts or similar.<br>Modelling studies with no new measured prevalence estimates.<br>Articles reporting only data from a study not conducted in humans, environmental studies, technology assessments (studies on diagnostic and/or laboratory methods).<br>Opinion papers, editorials, guidelines or recommendations, perspectives, position papers, correspondence articles, systematic reviews or meta-analyses without original prevalence data.<br>Articles reporting data on <u>pregnant women</u> in countries with a population of >5 million inhabitants, but with a sample size <100 participants or with a sample size <50 participants for countries with a population of <5 million.<br>Articles reporting data on <u>risk groups</u> with a sample size of <100 participants. Sample sizes <100 and ≥50 are accepted for: <ul style="list-style-type: none"> <li>- Studies of transgender (TG) or groups with KP overlap</li> <li>- Any risk group study from countries with a population of ≤1 million.</li> </ul> |
| Studies reporting HIV prevalence data in individuals aged 15 years or older.                                                                                                         | Studies specifically focused on children (aged 0-14 years), unless migrants.                                                                                                                                                                                                                                                                                                                                                                                                                                                                                                                                                                                                                                                                                                                                                                                                                                                                                                                                                                                                                                               |

**Supplementary Table S3. Criteria for assessing the risk of bias in MSM/PWID/SW/TG and migrants**

| Population group | Data item               | Criteria                                                                                                       | Score |
|------------------|-------------------------|----------------------------------------------------------------------------------------------------------------|-------|
| MSM/PWID/SW/TG   | Sampling venue coverage | Single venue                                                                                                   | 0     |
|                  |                         | Multi-centre/single venue type                                                                                 | 1     |
|                  |                         | Multi-centre/multiple venue types                                                                              | 2     |
|                  | Sampling method         | Convenience (non-random or non-exhaustive)                                                                     | 0     |
|                  |                         | Exhaustive or random                                                                                           | 1     |
|                  | Sample size*            | 100-199                                                                                                        | 0     |
| 200+             |                         | 1                                                                                                              |       |
| Migrants         | Age                     | Clear age bias (i.e. juvenile offenders only) or no information                                                | 0     |
|                  |                         | No clear age bias in age profile of subjects                                                                   | 1     |
|                  | Gender                  | Clear bias in gender or no information                                                                         | 0     |
|                  |                         | No clear bias in gender distribution of subjects; could be considered representative if information is limited | 1     |
|                  | PWID                    | Exclusively among PWID/former PWID prisoners                                                                   | 0     |
|                  |                         | PWID not used to select subjects; no bias toward PWID                                                          | 1     |
|                  | Population coverage     | Single centre/local                                                                                            | 0     |
|                  |                         | Multi-centre/local or regional                                                                                 | 1     |
|                  |                         | Multi-centre/national                                                                                          | 2     |
|                  | Sampling method         | Convenience (non-random or non-exhaustive)                                                                     | 0     |
|                  |                         | Exhaustive or random                                                                                           | 1     |
|                  | Sample size             | 100-199                                                                                                        | 0     |
| 200+             |                         | 1                                                                                                              |       |

MSM: men who have sex with men; PWID: people who inject drugs; SW: sex workers; TG: transgender people.

\* For studies of transgender people, the sample size criteria for study inclusion was >50; studies with 50-100 participants were scored 0; studies with 100+ participants were scored 1.

**Supplementary Table S4. Overview of included HIV seroprevalence studies with key results parameters, by population group and EU/EEA country**

| Population group          | Country             | Author (year)        | Geographical coverage | N    | Sampling method <sup>a</sup>     | Sampling period | HIV prevalence (95% CI) | Total bias score <sup>b</sup> |
|---------------------------|---------------------|----------------------|-----------------------|------|----------------------------------|-----------------|-------------------------|-------------------------------|
| Men who have sex with men | Belgium [29]        | Vanden Berghe (2011) | Antwerp and Ghent     | 379  | Time Location Sampling (TLS)     | 2009-2010       | 6.0% (4.9-9.1%)         | 4                             |
|                           | Belgium [24]        | Mirandola (2018)     | Brussels              | 582  | TLS                              | 2013-2014       | 12.3% (7.6-19.4%)       | 4                             |
|                           | Bulgaria [24]       | Mirandola (2018)     | Sofia                 | 361  | TLS                              | 2013-2014       | 3.0% (0.9-9.1%)         | 4                             |
|                           | Croatia [25]        | Kolaric (2011)       | National (7 cities)   | 387  | Convenience, NGO-based           | 2003-2006       | 3.0% (1.3-6.3%)         | 3                             |
|                           | Croatia [26]        | Bozicevic (2012)     | Zagreb                | 232  | Respondent-driven sampling (RDS) | 2010-2011       | 3.6% (1.1-5.1%)         | 3                             |
|                           | Cyprus [27]         | Pylli (2014)         | National              | 200  | TLS                              | 2011-2012       | 2.5% (0.08-5.7%)        | 3                             |
|                           | Czech Republic [28] | Mirandola (2009)     | Prague                | 387  | TLS                              | 2008-2009       | 2.6% (1.0-4.2%)         | 4                             |
|                           | France [34]         | Velter (2012)        | Paris                 | 2646 | TLS                              | 2009            | 17.7% (15.3-20.4%)      | 4                             |
|                           | France [35]         | Sommen (2018)        | National              | 886  | TLS                              | 2015            | 14.3% (12.0-16.9%)      | 4                             |
|                           | Germany [24]        | Mirandola (2018)     | Hamburg               | 390  | TLS                              | 2013-2014       | 7.5% (3.9-13.8%)        | 4                             |
|                           | Hungary [30]        | Amirkhanian (2009)   | Budapest              | 153  | Convenience, community-based     | 2007            | 9.2% (5.1-14.9%)        | 2                             |
|                           | Italy [28]          | Mirandola (2009)     | Verona                | 390  | TLS                              | 2008-2009       | 11.8% (8.6-15.0%)       | 4                             |
|                           | Italy [24]          | Mirandola (2018)     | Verona                | 397  | RDS                              | 2013-2014       | 9.6% (4.5-14.9%)        | 4                             |
|                           | Lithuania [24]      | Mirandola (2018)     | Vilnius               | 322  | RDS                              | 2013-2014       | 3.4% (0.0-6.9%)         | 4                             |
|                           | Netherlands [38]    | Achterbergh (2017)   | Amsterdam             | 994  | Exhaustive, STI-clinic based     | 2011            | 29% (26.3-32.0%)        | 1                             |
|                           | Poland [24]         | Mirandola (2018)     | Warsaw                | 405  | TLS                              | 2013-2014       | 7.2% (4.3-11.9%)        | 4                             |
|                           | Portugal [24]       | Mirandola (2018)     | Lisbon                | 371  | TLS                              | 2013-2014       | 17.1% (12.4-23.0%)      | 4                             |
|                           | Romania [28]        | Mirandola (2009)     | Bucharest             | 345  | TLS                              | 2008-2009       | 4.6% (2.4-6.8%)         | 4                             |
|                           | Romania [24]        | Mirandola (2018)     | Bucharest             | 181  | RDS                              | 2013-2014       | 18.0% (9.1-27.0%)       | 4                             |
|                           | Slovakia [28]       | Mirandola (2009)     | Bratislava            | 342  | TLS                              | 2008-2009       | 6.1% (3.5-8.6%)         | 4                             |
| Slovakia [24]             | Mirandola (2018)    | Bratislava           | 400                   | RDS  | 2013-2014                        | 4.3% (2.2-6.2%) | 4                       |                               |

|                         |                            |                       |                                               |                                                |                                                 |                                              |                                                                        |   |
|-------------------------|----------------------------|-----------------------|-----------------------------------------------|------------------------------------------------|-------------------------------------------------|----------------------------------------------|------------------------------------------------------------------------|---|
|                         | Slovenia [23] <sup>c</sup> | Klavs (2009)          | Ljubljana                                     | 124<br>137                                     | Convenience, NGO-based                          | 2007<br>2008                                 | 2.4% (-)<br>2.2% (-)                                                   | 0 |
|                         | Slovenia [28]              | Mirandola (2009)      | Ljubljana                                     | 389                                            | TLS                                             | 2008-2009                                    | 5.1% (2.9-7.3%)                                                        | 4 |
|                         | Slovenia [24]              | Mirandola (2018)      | Ljubljana                                     | 347                                            | TLS                                             | 2013-2014                                    | 4.4% (2.1-8.9%)                                                        | 4 |
|                         | Spain [28]                 | Mirandola (2009)      | Barcelona                                     | 388                                            | TLS                                             | 2008-2009                                    | 17.0% (13.3-20.7)                                                      | 4 |
|                         | Spain [36]                 | Etcheverry (2010)     | Madrid and Barcelona                          | 299                                            | Convenience, NGO-based                          | 2005                                         | 4.7% (2.6-7.7%)                                                        | 3 |
|                         | Spain [37]                 | Folch (2010)          | Catalonia                                     | 321<br>323                                     | Convenience, community-based                    | 2004<br>2006                                 | 24% (19.4-29.0%)<br>19.8% (15.6-24.6%)                                 | 3 |
|                         | Spain [24]                 | Mirandola (2018)      | Barcelona                                     | 400                                            | TLS                                             | 2013-2014                                    | 14.2% (10.1-19.5%)                                                     | 4 |
|                         | Sweden [24]                | Mirandola (2018)      | Stockholm                                     | 356                                            | TLS                                             | 2013-2014                                    | 2.4% (1.1-5.2%)                                                        | 4 |
|                         | United Kingdom [31]        | McDaid (2011)         | Glasgow and Edinburgh                         | 1344<br>1228                                   | TLS                                             | 2005<br>2008                                 | 4.4% (3.4-6.0%)<br>4.6% (3.5-6.0%)                                     | 4 |
|                         | United Kingdom [32]        | Wallace (2014)        | Glasgow and Edinburgh                         | 1218                                           | TLS                                             | 2011                                         | 4.8% (3.8-6.2%)                                                        | 3 |
|                         | United Kingdom [33]        | Aghaizu (2016)        | London                                        | 1 377<br>1 503<br>1 153<br>1 106<br>965<br>782 | Convenience, community-based                    | 2004<br>2005<br>2006<br>2008<br>2011<br>2013 | 13% (-)<br>13% (-)<br>17% (-)<br>15% (-)<br>8% (-)<br>14% (11.2-16.2%) | 3 |
|                         | United Kingdom [24]        | Mirandola (2018)      | Brighton                                      | 402                                            | TLS                                             | 2013-2014                                    | 17.6% (13.8-22.3%)                                                     | 4 |
| People who inject drugs | Croatia [25]               | Kolaric (2011)        | National (7 cities)                           | 323                                            | Convenience, NGOs and harm reduction sites      | 2003-2006                                    | 0.6% (0.0-2.2%)                                                        | 3 |
|                         | Croatia [39] <sup>d</sup>  | Kolaric (2010)        | Split, Zagreb, Rijeka, national prison system | 601<br>200                                     | Convenience, harm reduction sites and prisons   | 2007                                         | PWID 0.0% (-)<br>- PWID/prisoners 0.0% (-)                             | 3 |
|                         | Croatia [40]               | Kolovrat (2010)       | Brod-Posavina County                          | 103                                            | Exhaustive, drug treatment centres              | 2009                                         | 0.0% (-)                                                               | 3 |
|                         | Croatia [41]               | Vilibić-Čavlek (2018) | National                                      | 153                                            | Convenience, VCT, NGOs and harm reduction sites | 2011-2013                                    | 0.7% (0.0-3.6%)                                                        | 2 |
|                         | Croatia [42]               | Handanagic (2016)     | Zagreb, Split, Rijeka                         | 820                                            | RDS                                             | 2014-2015                                    | 0.5% (0.1-1.2%)                                                        | 4 |

|                             |                          |                             |      |                                                                 |           |                                                                                                                                                             |   |                  |
|-----------------------------|--------------------------|-----------------------------|------|-----------------------------------------------------------------|-----------|-------------------------------------------------------------------------------------------------------------------------------------------------------------|---|------------------|
| Estonia [64]                | Uusküla (2011)           | Tallinn                     | 350  | RDS                                                             | 2005      | 54% (-)                                                                                                                                                     | 4 |                  |
|                             |                          |                             | 350  |                                                                 |           | 2007                                                                                                                                                        |   | 55% (-)          |
|                             |                          |                             | 327  |                                                                 |           | 2009                                                                                                                                                        |   | 50% (44.6-55.7%) |
| Estonia [65]                | Uusküla (2015)           | Kohtla-Järve                | 370  | RDS                                                             | 2012      | 63% (59-67%)                                                                                                                                                | 4 |                  |
| France [53]                 | Jauffret-Roustide (2009) | National                    | 2389 | TLS, harm reduction and community sites                         | 2004-2005 | 10.8% (6.8-16.6%)                                                                                                                                           | 4 |                  |
| France [54]                 | Weill-Barillet (2016)    | National                    | 1389 | Random, harm reduction sites                                    | 2011      | 13% (10.2-17.2%)                                                                                                                                            | 4 |                  |
| Germany [43] <sup>e</sup>   | Wenz (2016)              | Eight cities                | 2077 | RDS                                                             | 2011-2014 | Berlin 3.9% (-)<br>Cologne 6.1% (-)<br>Essen 0.0% (-)<br>Frankfurt 9.1% (-)<br>Hamburg 1.6% (-)<br>Hannover 8.7% (-)<br>Leipzig 3.0% (-)<br>Munich 5.0% (-) | 4 |                  |
| Germany [66] <sup>d,e</sup> | Derks (2018)             | Eight cities                | 1526 | RDS                                                             | 2011-2014 | PWID/non-migrants 4.6% (-)<br>PWID/migrants 5.8% (-)                                                                                                        | 4 |                  |
| Greece [55]                 | Hatzakis (2015)          | Athens                      | 3308 | RDS                                                             | 2012-2013 | 15.1% (13.9-16.4%)                                                                                                                                          | 4 |                  |
| Greece [56]                 | Fotiou (2016)            | Central and southern Greece | 562  | Exhaustive, OST sites                                           | 2013      | 15.7% (12.8-18.9%)                                                                                                                                          | 4 |                  |
| Hungary [44]                | Gyarmathy (2010)         | Budapest                    | 186  | Convenience, NSP sites and outreach                             | 2005-2006 | 0.0% (-)                                                                                                                                                    | 2 |                  |
| Italy [57]                  | Camoni (2009)            | National                    | 807  | Random, drug treatment centres                                  | 2005      | 14.4% (11.7-17.4%)                                                                                                                                          | 3 |                  |
| Lithuania [44]              | Gyarmathy (2010)         | Vilnius                     | 297  | Convenience, NSP sites and outreach                             | 2008-2009 | 9.8% (6.6-13.7%)                                                                                                                                            | 2 |                  |
| Luxembourg [45]             | Removille (2011)         | National                    | 202  | Convenience, drug treatment centres and prisons                 | 2005      | 2.5% (0.3-4.6%)                                                                                                                                             | 3 |                  |
| Poland [58]                 | Rosinska (2015)          | National (6 regions)        | 763  | Convenience, community, harm reduction and drug treatment sites | 2005      | 18.0% (9.2-27.0%)                                                                                                                                           | 3 |                  |
| Spain [59]                  | Huntington (2010)        | Catalonia                   | 296  | Convenience, community-based                                    | 2006      | 58.1% (52.5-63.7%)                                                                                                                                          | 3 |                  |

|           |                                  |                  |                           |                          |                                                                                                                        |                              |                                                                                  |   |
|-----------|----------------------------------|------------------|---------------------------|--------------------------|------------------------------------------------------------------------------------------------------------------------|------------------------------|----------------------------------------------------------------------------------|---|
|           | Spain [60]                       | Sanvisens (2014) | Barcelona                 | 1170                     | Exhaustive, OST sites                                                                                                  | 1992-2010                    | 61.3% (58.4-64.1%)                                                               | 3 |
|           | Spain [61] <sup>d</sup>          | Folch (2011)     | Catalonia                 | 748                      | Convenience, harm reduction sites                                                                                      | 2008-2009                    | 34.5% (31.1-38.0%)<br>- PWID/non-migrants 43.0% (-)<br>- PWID/migrants 22.4% (-) | 2 |
|           | Spain [62] <sup>d</sup>          | Folch (2013)     | Catalonia                 | 810<br>159<br>-          | Convenience, harm reduction sites                                                                                      | 2008-2011                    | Men 31.5% (-)<br>Women 38.7% (-)<br>- PWID/FSW 53.3% (-)                         | 3 |
|           | Spain [63]                       | Folch (2016)     | Catalonia                 | 761                      | Convenience, harm reduction sites and community                                                                        | 2010-2011                    | 33.2% (29.8-36.5%)                                                               | 3 |
|           | Sweden [46]                      | Blome (2011)     | Malmö                     | 1183                     | Exhaustive, NSP site                                                                                                   | 1997-2005                    | 0.3% (0.0-0.9%)                                                                  | 2 |
|           | United Kingdom [47] <sup>d</sup> | Marongiu (2012)  | National                  | 8671<br>317<br>8354      | Exhaustive, harm reduction and drug treatment sites                                                                    | 1998-2007                    | 0.9% (0.7-1.1%)<br>- PWID/MSM 3.2% (-)<br>- PWID/MSW 0.8% (-)                    | 3 |
|           | United Kingdom [48]              | Hickman (2009)   | Bristol                   | 299                      | RDS                                                                                                                    | 2006                         | 0.7% (0.1-2.4%)                                                                  | 3 |
|           | United Kingdom [49]              | Hope (2014)      | National                  | 7149<br>6054             | Exhaustive, harm reduction and drug treatment sites                                                                    | 2004-2007<br>2008-2011       | 1.4% (-)<br>1.4% (1.1-1.7%)                                                      | 4 |
|           | United Kingdom [50]              | Hope (2016)      | National                  | 383<br>228               | Exhaustive, harm reduction and drug treatment sites (only men injecting image and performance enhancing drugs (IPEDs)) | 2010-2011<br>2012-2013       | 1.2% (-)<br>0.8% (0.1-3.1%)                                                      | 4 |
|           | United Kingdom [51]              | Hope (2017)      | National                  | 5261                     | Exhaustive, harm reduction and drug treatment sites                                                                    | 2011-2014                    | 1.1% (0.8-1.4%)                                                                  | 4 |
|           | United Kingdom [52]              | McAuley (2019)   | Greater Glasgow and Clyde | 927<br>865<br>915<br>821 | Convenience, NSP sites                                                                                                 | 2012<br>2014<br>2016<br>2018 | 0.1% (0.0-0.6%)<br>1% (-)<br>3% (-)<br>5% (3.4-6.2%)                             | 3 |
| Prisoners | Croatia [68] <sup>d</sup>        | Burek (2010)     | National                  | 3348<br>815              | Convenience                                                                                                            | 2005-2007                    | 0.15% (0.1-0.4%)<br>- Prisoners/PWID 0.5% (-)                                    | 6 |
|           | Estonia [80]                     | Kivimets (2014)  | National                  | 3289                     | Exhaustive                                                                                                             | 2012                         | 15.6% (14.5-17.1%)                                                               | 6 |
|           | Finland [69]                     | Viitanen (2011)  | National                  | 88<br>295                | Random                                                                                                                 | 2006                         | Female 1.1% (0.0-6.2%)<br>Male 0.7% (0.1-2.4%)                                   | 7 |



|             |                           |                            |                          |                         |                                      |                              |                                                                                                                                                                                                                                                                                                                                                                      |   |
|-------------|---------------------------|----------------------------|--------------------------|-------------------------|--------------------------------------|------------------------------|----------------------------------------------------------------------------------------------------------------------------------------------------------------------------------------------------------------------------------------------------------------------------------------------------------------------------------------------------------------------|---|
|             | France [73] <sup>d</sup>  | Semaille (2013)            | National                 | 1351                    | Random                               | 2010                         | 2.0% (1.0-4.2%)<br>- Prisoners/non-migrants 1.1% (0.4-2.5%)<br>- Prisoners/migrants (SSA) 15.4% (6.6-31.8%)<br>- Prisoners/migrants (north Africa) 3.2% (0.4-24.6%)<br>- Prisoner/migrants (Americas) 3.5% (0.8-13.5%)<br>- Prisoners/migrants (Asia) 0.0%<br>- Prisoners/migrants (eastern Europe) 0.0%<br>- Prisoners/migrants (western Europe) 0.04% (0.005-0.4%) | 7 |
|             | Germany [70]              | Schulte (2009)             | National                 | 14537                   | Convenience                          | 2006                         | 1.2% (1.0-1.4%)                                                                                                                                                                                                                                                                                                                                                      | 7 |
|             | Hungary [71]              | Treso (2012)               | National                 | 4894                    | Exhaustive                           | 2009                         | 0.04% (0.0-0.15%)                                                                                                                                                                                                                                                                                                                                                    | 6 |
|             | Hungary [72] <sup>d</sup> | Vanya (2017)               | Country's largest prison | 200                     | Convenience                          | 2014                         | Prisoners/MSM and/or PWID 0.0% (-)                                                                                                                                                                                                                                                                                                                                   | 2 |
|             | Italy [74]                | Sagnelli (2012)            | National                 | 2339                    | Exhaustive                           | -                            | 3.8% (3.1-4.7%)                                                                                                                                                                                                                                                                                                                                                      | 5 |
|             | Italy [75]                | Siniscalli (2016)          | Tuscany                  | 3229                    | Exhaustive                           | 2012                         | 1.2% (0.9-1.6%)                                                                                                                                                                                                                                                                                                                                                      | 6 |
|             | Italy [76]                | Monarca (2015)             | National                 | 6630                    | Exhaustive                           | 2013                         | 5.1% (4.6-5.7%)                                                                                                                                                                                                                                                                                                                                                      | 5 |
|             | Portugal [77]             | Marques (2011)             | Coimbra                  | 151                     | Exhaustive                           | 2008                         | 6.6% (3.2-11.8%)                                                                                                                                                                                                                                                                                                                                                     | 4 |
|             | Spain [67]                | Hernandez-Fernandez (2010) | National                 | NA                      | Exhaustive                           | 2004<br>2006<br>2008<br>2009 | 11.2% (-)<br>9.0% (-)<br>7.8% (-)<br>7.0% (-)                                                                                                                                                                                                                                                                                                                        | 3 |
|             | Spain [78]                | Ferrer-Castro (2012)       | Ourense                  | 425                     | Exhaustive (clinical records)        | 2009                         | 8.5% (6.0-11.5%)                                                                                                                                                                                                                                                                                                                                                     | 4 |
|             | Spain [79] <sup>d</sup>   | Marco (2012)               | National                 | 371<br>87<br>229<br>149 | Random                               | 2008                         | 10.8% (7.5%-14%)<br>- Prisoners/PWID 39.0% (-)<br>- Prisoners/non-migrants 15.7% (-)<br>- Prisoners/migrants 2.7% (-)                                                                                                                                                                                                                                                | 6 |
| Sex workers | Italy [84] <sup>d</sup>   | Zermiani (2012)            | Verona                   | 354<br>286              | Convenience, outreach and STI clinic | 1999-2007                    | FSW 4.6% (2.7-7.4%)<br>- FSW/Africa 4.9% (-)                                                                                                                                                                                                                                                                                                                         | 2 |

|                                  |                     |                                 |                                      |                                               |                                          |                                                                                                                                                                                                                                                                                       |   |
|----------------------------------|---------------------|---------------------------------|--------------------------------------|-----------------------------------------------|------------------------------------------|---------------------------------------------------------------------------------------------------------------------------------------------------------------------------------------------------------------------------------------------------------------------------------------|---|
|                                  |                     |                                 | 2                                    |                                               |                                          | - FSW/South America 0.0% (-)                                                                                                                                                                                                                                                          |   |
|                                  |                     |                                 | 57                                   |                                               |                                          | - FSW/Eastern Europe 3.5% (-)                                                                                                                                                                                                                                                         |   |
| Netherlands [81] <sup>d</sup>    | van Veen (2010)     | Rotterdam, Amsterdam, the Hague | 547<br>69<br>88<br>390               | Convenience, community-based                  | 2002-2005                                | SW 5.7% (4.0-7.9%)<br>- FSW 1.5% (0.6-3.2%)<br>- SW/PWID 13.6% (7.6-22.0%)<br>- SW/TG 18.8% (10.9-29.4%)                                                                                                                                                                              | 3 |
| Netherlands [82] <sup>d</sup>    | Fournet (2016)      | National                        | 2688<br>1881                         | Exhaustive, STI clinic                        | 2006-2012                                | SW/male 2.5% (1.9-3%)<br>- SW/MSM 3.4% (-)                                                                                                                                                                                                                                            | 3 |
| Netherlands [83]                 | Verscheijden (2015) | National                        | 5770                                 | Exhaustive, STI clinic                        | 2013                                     | 0.1% (0.0-0.2%)                                                                                                                                                                                                                                                                       | 3 |
| Portugal [87] <sup>d</sup>       | Dias (2015)         | Lisbon                          | 213<br>9<br>28<br>176                | Convenience, community-based                  | 2011                                     | 8.9% (5.5-13.6%)<br>- SW/TG 22.2% (0.0-56.0%)<br>- SW/male 10.7% (0.0-23.0%)<br>- SW/female 8.0% (4.0-12.0%)                                                                                                                                                                          | 2 |
| Portugal [88] <sup>d</sup>       | Dias (2017)         | National                        | 176<br>88<br>44<br>44                | Convenience, community-based                  | 2011                                     | 8.0% (4.4-13.0%)<br>- FSW/non-migrant 8.0% (-)<br>- FSW/documented migrant 2.3% (-)<br>- FSW/undocumented migrant 13.6% (-)                                                                                                                                                           | 2 |
| Spain [36]                       | Etcheverry (2010)   | Barcelona and Madrid            | 337                                  | Convenience, NGOs                             | 2005                                     | 4.2% (2.3-6.9%)                                                                                                                                                                                                                                                                       | 3 |
| Spain [85] <sup>d</sup>          | Folch (2014)        | Catalonia                       | 400<br><br>400<br><br>400<br><br>400 | Convenience, community-based                  | 2005<br><br>2007<br><br>2009<br><br>2011 | 1.8% (-)<br>- FSW/non-migrant 9.3% (-)<br>- FSW/migrant 0.8% (-)<br>2.5% (-)<br>- FSW/non-migrant 8.9% (-)<br>- FSW/migrant 1.5% (-)<br>2.5% (-)<br>- FSW/non-migrant 11.4% (-)<br>- FSW/migrant 1.4% (-)<br>1.5% (0.6-3.2%)<br>- FSW/non-migrant 14.7% (-)<br>- FSW/migrant 0.3% (-) | 3 |
| United Kingdom [86] <sup>d</sup> | Platt (2011)        | London                          | 268<br>105                           | Convenience, NGOs, clinic and community-based | 2009                                     | 1.1% (0.1-2.4%)<br>- FSW/non-migrant 0.9% (-)                                                                                                                                                                                                                                         | 3 |

|                    |            |                |         |           |                          |           |                                                                     |   |
|--------------------|------------|----------------|---------|-----------|--------------------------|-----------|---------------------------------------------------------------------|---|
|                    |            |                |         | 163       |                          |           | - FSW/migrant 1.2% (-)                                              |   |
| Transgender people | Italy [89] | Luzzati (2016) | Trieste | 20<br>173 | Exhaustive, clinic-based | 2000-2014 | Female-to-male 0.0% (0.0-16.8%)<br>Male-to-female 12.1% (7.7-18.0%) | 2 |

MSM: men who have sex with men; PWID: people who inject drugs; SW: sex workers; TG: transgender people; SSA: Sub-Saharan Africa.

<sup>a</sup> Sampling method: TLS = Time Location Sampling, RDS = Respondent Driven Sampling (both community-based).

<sup>b</sup> Bias score range: From 0 (high risk of bias) to 4 (low risk of bias) for MSM, PWID, SW and TG; and from 0 (high risk of bias) to 7 (low risk of bias) for prisoners. Detailed criteria for the risk of bias assessments are available in supplementary Table 3.

<sup>c</sup> Excluded from forest plot due to a high risk of bias (summary bias score = 0) and since other studies were available for MSM in Slovenia.

<sup>d</sup> Study including data for multiple (overlapping) risk groups.

<sup>e</sup> Both studies are based on the same data source; hence only Wenz [36] (original paper reporting on the full study population) was included in the forest plot while Derks [59] (later paper reporting on a sub-set of the original study population) is listed here because it reports prevalence data for a different population sub-group (migrant PWID versus non-migrant PWID).

**Supplementary Table S5. Articles excluded after full-text review, grouped by reasons for exclusion**

| Reasons for exclusion                                                                                                                      | Number of excluded articles |
|--------------------------------------------------------------------------------------------------------------------------------------------|-----------------------------|
| Notification or incident data; or no HIV prevalence data; or data from evaluation of testing interventions; study protocol; clinical focus | 79                          |
| Self-reported serological status; unclear confirmation of serological status                                                               | 9                           |
| Duplicate reference/data                                                                                                                   | 22                          |
| No original data (commentary, erratum, guidelines, etc.)                                                                                   | 18                          |
| Review or overview article                                                                                                                 | 50                          |
| Modelled data only                                                                                                                         | 10                          |
| Sampling period outside defined criteria                                                                                                   | 9                           |
| Sample size too small                                                                                                                      | 5                           |
| Did not address relevant key population group or did not distinguish drug injectors from drug users who did not inject                     | 16                          |
| Study not conducted in the EU/EEA                                                                                                          | 14                          |
| Study not related to HIV                                                                                                                   | 9                           |
| Sampled only persons with a hepatitis, tuberculosis or a concurrent STI                                                                    | 7                           |
| In-patient setting                                                                                                                         | 7                           |
| Grey literature                                                                                                                            | 4                           |
| TOTAL                                                                                                                                      | 259                         |
